# Supplementary material for: N-acetyl-l-leucine lowers pS129-synuclein and improves synaptic function in models of Parkinson’s disease
Source: Research Square preprint supplement (doi:10.21203/rs.3.rs-6298077/v1), 2025-04-09
Supplement: Supplementary file 1 [file b4c6cb8d6e90c3689ff42b99.xlsx]

## Sheet: Lysosomal
UniProt ID	Gene Name	CTRL_1	CTRL_2	CTRL_3	5nM_NALL_1	5nM_NALL_2	5nM_NALL_3	10nM_NALL_1	10nM_NALL_2	10nM_NALL_3	10nM NALL/CTRL	ANOVA_p_value	BH_corrected_p_value
P06865	HEXA	1231242	1041586	1187742	2048824	1843857	2060491	2555135	2543732	2780802	2.27699	1.63e-05	0.00272896
P10619	CTSA	87042	56969	68393	108274	101290	109985	138386	143457	176658	2.15863	0.00167402	0.0147079
Q9UHL4	DPP7	2197586	1714114	1587827	2715813	2714098	2726620	3280953	4019606	4032395	2.06071	0.00078327	0.011521
P07686	HEXB	2469990	2098590	2314340	3747872	3754141	3838867	4612823	4547090	4979084	2.05421	8.12e-06	0.00272896
P13473-2	LAMP2	22708	23156	23568	29633	33368	38877	40128	46361	50194	1.96859	0.00141012	0.0136757
Q8NCC3	PLA2G15	37699	35765	39518	54188	66572	64950	65394	71065	78022	1.89836	0.000698809	0.0107622
P34059	GALNS	143635	143410	141823	195721	193372	196907	250912	264806	296112	1.89296	7.36e-05	0.00441264
P50897	PPT1	136217	125328	128716	146948	169861	177423	204924	199702	224825	1.6129	0.000665327	0.0104812
P20645	M6PR	42545	41014	47347	51136	54742	54634	63544	67588	79450	1.60865	0.00239212	0.0169835
P16278	GLB1	70831	53130	59265	76076	70951	76247	90483	88764	114023	1.60059	0.0104248	0.0392681
P08236	GUSB	587809	458797	490894	689594	678120	672549	744398	785242	908795	1.58597	0.00332011	0.019745
O00754	MAN2B1	1566802	1265278	1418629	1747338	1739929	1694324	1993762	2162234	2245284	1.50593	0.000816707	0.0116358
Q13510	ASAH1	1205852	1153348	1139884	1374507	1392652	1512944	1698847	1827807	1732311	1.50295	7.39e-05	0.00441264

## Sheet: Synaptic
UniProt ID	Gene Name	CTRL_1	CTRL_2	CTRL_3	5nM_NALL_1	5nM_NALL_2	5nM_NALL_3	10nM_NALL_1	10nM_NALL_2	10nM_NALL_3	10nM NALL/CTRL	ANOVA_p_value	BH_corrected_p_value
Q9UPR5	SLC8A2	1422277	1423848	873504	2630634	2778067	2067477	2647075	2820168	2887708	2.24618	0.00143251	0.0136917
P56730	PRSS12	228469	208505	136188	280961	298515	296837	359191	346802	379212	1.89337	0.00131505	0.013505
P55287	CDH11	344839	298388	213202	412091	469012	386283	447636	562156	560040	1.833	0.00774397	0.0325144
Q4KMQ2	ANO6	142185	126600	110759	186355	195717	187454	204694	227952	243353	1.78108	0.000508053	0.0093147
O75379	VAMP4	135831	137227	114441	184613	178225	171280	233235	228330	224011	1.76923	2.7e-05	0.00311236
Q9BTU6	PI4K2A	100373	86734	95645	134391	142548	137094	144354	150625	185105	1.6979	0.00273375	0.017868
Q7L1I2	SV2B	28671	33710	23954	30269	41621	38106	44146	49901	52413	1.69642	0.00777266	0.0325272
P51608	MECP2	164117	238585	180815	234727	238149	228863	322857	351487	271868	1.62157	0.01033	0.0390242
P50897	PPT1	136217	125328	128716	146948	169861	177423	204924	199702	224825	1.6129	0.000665327	0.0104812
P10114	RAP2A	41291	37791	37718	51990	56518	56458	55275	61516	71065	1.60836	0.00302699	0.0187841
Q9H2U2	PPA2	832539	812763	742776	1016632	1126118	1001600	1125073	1227655	1291515	1.52602	0.000840785	0.0118509
Q96BY6	DOCK10	6221	7087	5961	7812	7687	7551	9741	9057	10125	1.50101	0.000455008	0.00892541

## Sheet: Mitochondrial
UniProt ID	Gene Name	CTRL_1	CTRL_2	CTRL_3	5nM_NALL_1	5nM_NALL_2	5nM_NALL_3	10nM_NALL_1	10nM_NALL_2	10nM_NALL_3	10nM NALL/CTRL	ANOVA_p_value	BH_corrected_p_value
O94925	GLS	887960	876392	876686	1444968	1987988	1929496	1750929	2048547	2486325	2.38005	0.00399515	0.021867
O75521	ECI2	1164432	859597	964254	1443990	1578977	1559520	2078631	2311874	2332994	2.24995	6.57e-05	0.00441264
Q02318	CYP27A1	35879	26271	25607	40832	48038	41868	54917	60024	61142	2.00648	0.000581947	0.00975072
P51398	DAP3	21663	20635	18153	23829	33624	31288	33279	43224	40240	1.9312	0.00523187	0.0256117
P12235	SLC25A4	1581757	1700681	1714787	1879087	2527807	2488869	2667256	2983252	3705581	1.87226	0.00914639	0.0360548
Q8TB22	SPATA20	2689	2153	2246	2739	3098	3414	4115	4050	4832	1.83366	0.00149244	0.0137643
P21912	SDHB	844002	829009	847948	1000041	1299172	1159691	1283730	1504440	1781086	1.81251	0.00735443	0.0315759
Q3SY69	ALDH1L2	111878	97467	74719	119597	134035	109967	159262	177489	176156	1.8056	0.00163595	0.0145401
P00403	MT-CO2	852385	889431	928620	1105634	1099170	1248419	1466049	1460817	1758847	1.75466	0.000960789	0.0121946
O60783	MRPS14	61087	59182	59143	76726	84162	81027	92800	105436	109562	1.71559	0.000243053	0.00701639
A3KMH1	VWA8	5330	4688	5140	6772	6893	7158	6635	9294	9538	1.6801	0.0130999	0.0453122
Q7Z4W1	DCXR	89747	98611	97061	126559	138280	134272	148590	157613	170604	1.67055	0.000167997	0.00609674
Q9BSH4	TACO1	119675	113748	112648	134606	150382	172786	194184	191983	189817	1.66435	0.000526873	0.00944422
Q96BW9	TAMM41	394766	412180	398455	596519	634216	574586	631902	663639	700818	1.65618	5.08e-05	0.00419249
Q86WA6	BPHL	2015565	2076568	2028286	2631577	2963588	2668300	3023630	3705972	3355366	1.64776	0.00109002	0.0126416
P51553	IDH3G	72912	69220	67311	91340	101524	104476	105629	108030	131176	1.64644	0.00270469	0.0178313
P33121	ACSL1	830800	782016	766111	960738	1120267	1050208	1183586	1314350	1413612	1.64425	0.000890683	0.0118696
Q16795	NDUFA9	382208	360847	401939	500378	544863	530947	543466	612010	716471	1.6349	0.00415102	0.0222214
O95299	NDUFA10	412317	380118	401061	486932	548019	554270	586236	637835	723481	1.6318	0.00172108	0.0147788
P82933	MRPS9	81151	78959	76891	97874	108257	104364	118981	126510	140826	1.63002	0.000458027	0.00892541
O75306	NDUFS2	50916	51630	55997	75337	74126	76054	83341	84657	90387	1.62975	1.65e-05	0.00272896
Q9ULD0	OGDHL	239711	250602	239987	302924	334536	343536	365226	387686	430744	1.62078	0.00061938	0.0100982
Q9Y399	MRPS2	6649	6381	5791	7305	7693	8494	8874	10742	10730	1.61235	0.00234465	0.0169696
Q9NZ45	CISD1	160721	170237	159189	208176	238951	233287	243602	255458	289622	1.60907	0.00109538	0.0126554
P55809	OXCT1	2158547	2316195	2158898	2711479	3365499	3027083	3283096	3313570	4028293	1.60168	0.00564891	0.0266276
P30048	PRDX3	978363	945440	947323	1198901	1374153	1355087	1460120	1477352	1637168	1.59333	0.000372801	0.008496
Q8N2F6	ARMC10	198763	186877	188549	248000	273148	266537	288961	288899	335061	1.58993	0.000637354	0.0102026
P22830	FECH	339198	300142	276160	412766	452225	406888	439089	500690	512602	1.58643	0.00145198	0.0137056
P09669	COX6C	298103	285544	284631	356318	350180	346230	418489	438692	514074	1.57928	0.00126923	0.0133743
O75380	NDUFS6	122705	124543	116708	145431	150828	139637	187305	194246	191588	1.57475	3.93e-06	0.00186871
O95169	NDUFB8	78189	78372	74679	87892	100082	97434	103948	118498	139269	1.56424	0.00813436	0.0335608
Q96BP2	CHCHD1	25826	24647	23624	28630	33440	31105	37969	40157	37421	1.5594	0.000211859	0.00671593
Q6NVY1	HIBCH	395865	386756	338797	522410	512685	436250	542861	628242	574758	1.55683	0.00237605	0.0169835
O00483	NDUFA4	28890	29048	30194	35893	39281	38177	41312	46974	48431	1.55128	0.000556238	0.00961931
Q9Y4W6	AFG3L2	1009846	956069	930483	1271937	1464439	1297727	1341758	1529109	1613125	1.54813	0.00194945	0.0156093
Q9H078	CLPB	59005	56236	54059	76584	82933	73728	88196	86455	87442	1.5481	5.18e-05	0.00419249
O43676	NDUFB3	22345	22133	22699	28081	30867	27644	32814	32693	37921	1.53963	0.000968131	0.0121946
P28331	NDUFS1	827870	815759	789228	1004608	1103004	1046250	1163515	1251318	1330782	1.5396	0.00026059	0.00720001
Q9BV79	MECR	75166	74260	64345	78619	94890	96587	101025	113995	113750	1.53795	0.00315668	0.019121
P57105	SYNJ2BP	19361	22433	21889	24404	29032	25893	30143	32500	35270	1.53751	0.00228769	0.0169129
P82673	MRPS35	16337	15631	16172	19144	19115	17877	22387	28411	23121	1.5355	0.00448463	0.0231787
P05141	SLC25A5	5600359	5918731	5493431	6476933	7408338	6961003	7933116	8911198	9224425	1.53233	0.000846395	0.0118509
P82912	MRPS11	84655	84971	77276	110145	110439	105361	118147	125481	133553	1.52765	0.000183251	0.00636042
Q9H2U2	PPA2	832539	812763	742776	1016632	1126118	1001600	1125073	1227655	1291515	1.52602	0.000840785	0.0118509
P51687	SUOX	86894	75242	75158	97507	108142	101793	116050	119471	126002	1.52352	0.000367521	0.008496
O76031	CLPX	25266	22238	25156	30922	30263	29928	36214	38188	36240	1.52274	4.65e-05	0.00411363
P49748	ACADVL	1053076	952156	950044	1365195	1432482	1303515	1325396	1473176	1686933	1.5178	0.00420736	0.0223219
Q9UIJ7	AK3	2088205	1890479	1964356	2234743	2603507	2399632	2701704	2956821	3334611	1.51322	0.00387137	0.0215303
Q9HBH5	RDH14	29819	28348	29602	38694	35499	37134	43747	42592	46352	1.51182	6.09e-05	0.00441264
O95167	NDUFA3	65535	57605	61253	72817	77888	75271	86956	89855	101323	1.50838	0.00094149	0.0120587
O43678	NDUFA2	106671	105926	91508	125054	124295	114050	145367	153688	159492	1.50786	0.000402019	0.008496
Q9Y2R5	MRPS17	60802	62389	61053	71648	75533	85582	83187	100662	93893	1.50747	0.0034728	0.0201152
P31930	UQCRC1	1249309	1440020	1420020	1683481	1739047	1659086	1983093	2087595	2112765	1.50473	9.87e-05	0.0051327
Q9P0J0	NDUFA13	90214	95493	88842	105776	108581	105431	136605	124294	151775	1.5031	0.00133976	0.013505
