# Supplementary material for: N-acetyl-l-leucine lowers pS129-synuclein and improves synaptic function in models of Parkinson’s disease
Source: Research Square preprint supplement (doi:10.21203/rs.3.rs-6298077/v1), 2025-04-09
Supplement: Supplementary file 4 [file f9a0d25a196a6c710b2211c3.xlsx]

## Sheet: pp_Vol
UniProt ID	Gene Name	NT_1	NT_2	NT_3	5mM_NALL_1	5mM_NALL_2	5mM_NALL_3	10nM_NALL_1	10mM_NALL_2	10mM_NALL_3	10 mM NALL/CTRL	ANOVA_p_value	BH_corrected_p_value
P46940	IQGAP1	697330	578331	689374	567387	521764	524798	430037	403429	473904	0.665316	0.00333819	0.019745
P52758	HRSP12	1456246	1213918	1556767	1114887	939502	1083155	1003555	909502	897351	0.664881	0.00692368	0.030308
P07355	ANXA2	5434053	4256982	4659588	3520781	3470184	3644437	3022646	3055362	3451673	0.66406	0.00456934	0.0235845
P00813	ADA	222230	200540	209135	163616	136105	153845	145107	138793	135379	0.663516	0.000376773	0.008496
P50454	SERPINH1	5417675	4323655	4844434	3728066	3734087	4023546	2898620	3259464	3514349	0.663142	0.00497779	0.0248498
Q9NR12	PDLIM7	35883	29742	32837	25277	21337	22663	21260	22284	21543	0.661037	0.00135973	0.013505
O00291	HIP1	224682	218736	231714	185766	175599	176360	155456	150252	140471	0.660877	2.44e-05	0.00300639
P21333	FLNA	15061266	12290289	13656566	10396804	10732561	10029285	8196996	9043032	9753306	0.658244	0.00235714	0.0169835
Q14019	COTL1	673314	688794	746564	597143	509730	577584	504707	473466	409800	0.658221	0.00170541	0.0147079
P11413	G6PD	252901	259209	247395	191132	170190	181991	159454	175237	160518	0.652015	3.48e-05	0.0037526
Q15121	PEA15	392652	369759	414152	288063	305154	293925	240396	269619	254365	0.649672	0.00012326	0.00519087
P11166	SLC2A1	255650	258775	248698	213523	180123	221620	206091	156819	129866	0.645736	0.0150831	0.0490394
P37802	TAGLN2	3423742	3252102	3788550	2349814	2352403	2621215	2075267	2221896	2459293	0.645661	0.00081371	0.0116358
P12036	NEFH	542391	550650	660501	417596	415287	467179	367904	399944	363787	0.645342	0.00272452	0.0178383
Q15942	ZYX	1155550	1066062	1148044	870239	839971	817582	705889	721044	737108	0.642214	1.76e-05	0.0027896
Q05639	EEF1A2	10826428	10702297	12067107	9179510	9634573	9747574	7096589	7019830	7450779	0.641961	0.000169641	0.00609674
P09496-3	CLTA	2256450	2310843	2186079	1821508	1671685	1385877	1574494	1334585	1399384	0.637972	0.00137887	0.0135886
O43175	PHGDH	1061745	1001649	1047834	817238	749575	806672	637370	700994	630154	0.632714	3.64e-05	0.0037526
Q6NZI2	PTRF	44549	43737	42514	36474	37685	39442	24582	25873	31864	0.62935	0.000584567	0.00975072
O00299	CLIC1	2692854	2462112	3095743	2181098	1810337	2143923	1730146	1690496	1748798	0.626545	0.00333498	0.019745
P63172	DYNLT1	385354	349075	423147	333521	263608	287245	286531	239831	198377	0.626083	0.0110784	0.0409944
P78330	PSPH	25379	23366	27671	20264	16954	19350	16695	14740	15713	0.616991	0.00108365	0.0126416
P46937-5	YAP1	90424	73241	83896	63128	56845	60240	48576	52082	51174	0.613311	0.000967035	0.0121946
Q58EX2	SDK2	48241	46932	46123	37964	31072	40343	27742	28253	29855	0.60759	0.000729954	0.011107
Q9Y696	CLIC4	586442	542166	613392	453233	458988	502245	346953	354514	352449	0.605003	0.00011631	0.00519087
Q14117	DPYS	778815	560059	592096	470847	516158	518516	374200	372329	420043	0.604138	0.0137577	0.046727
Q9BWD1	ACAT2	2193333	2195149	2339669	1686528	1550956	1719613	1365661	1313713	1370438	0.60192	1.61e-05	0.00272896
Q9H3Q1	CDC42EP4	387101	337999	383312	313024	241107	273179	246019	217697	198809	0.597724	0.00237597	0.0169835
P00966	ASS1	870119	734224	689953	617275	667829	708517	392089	411631	551970	0.590896	0.00737753	0.0316394
P14136	GFAP	953397	934566	1001482	592181	610780	673761	502286	621528	582158	0.590415	0.000103059	0.0051327
Q15149	PLEC	5327066	4517532	5286033	3515002	3524470	3516803	2779107	2915104	3184083	0.586776	0.000299983	0.00771037
Q9BU89	DOHH	50260	46413	52957	32514	27124	28679	29407	28218	28210	0.573648	7.3e-05	0.00441264
P29966	MARCKS	730744	738258	686862	585064	490377	412348	491131	355248	388763	0.572922	0.00334273	0.019745
Q08345	DDR1	144617	129449	152245	117220	93068	100004	92103	79521	69728	0.566141	0.00194133	0.0155828
Q14315	FLNC	2103290	1734778	1909919	1477005	1294623	1496898	1007362	1067506	1086384	0.549975	0.000491657	0.00921312
Q15582	TGFBI	355732	306835	341065	221616	234894	246677	143163	154196	254022	0.549386	0.00844877	0.0343279
P04792	HSPB1	3306287	2693924	2924399	2382431	2004451	2115579	1541725	1655531	1700749	0.54882	0.000799167	0.0115591
Q9H313	TTYH1	67891	71585	75535	53411	44160	52902	49252	37630	30501	0.54594	0.0026118	0.0175746
Q8N3V7-2	SYNPO	23775	18493	23503	15627	17297	20425	9913	12521	13368	0.544343	0.00713753	0.0309591
Q9UBG0	MRC2	76845	70403	65216	59025	43041	52319	38567	39192	37552	0.542732	0.0013525	0.013505
P80370	DLK1	3593	3057	3168	2827	2762	3000	2280	1432	1589	0.539927	0.00281029	0.0182118
Q9NPH2	ISYNA1	449393	469042	509212	315429	267946	317844	275235	259350	212626	0.523386	0.000232564	0.00685793
P12109	COL6A1	242961	222359	262714	163899	149207	171237	126772	121919	131110	0.52168	0.000121216	0.00519087
Q5EB52	MEST	369892	353927	377730	205900	206841	250801	216336	185793	170555	0.51989	0.000111748	0.0051327
Q9NZM1	MYOF	173583	146487	167475	119445	116059	125834	77522	80595	95034	0.519236	0.000263092	0.00720001
Q14764	MVP	119450	113900	122989	78471	68608	75890	59862	63247	60789	0.516076	5.92e-06	0.00250219
P12277	CKB	12283687	11140906	14695389	8943879	7309552	8727963	7339048	6176635	6063046	0.513608	0.00226157	0.0168686
P15311	EZR	1904720	1753315	2119140	1343849	1131908	1130985	950750	997266	972467	0.505521	0.000243471	0.00701639
P24821	TNC	89951	73635	124244	51880	41002	46358	57810	43966	43490	0.504694	0.0146143	0.0482996
Q96HC4	PDLIM5	129350	95413	130917	80826	60478	79582	64172	56074	57224	0.49896	0.00416126	0.0222323
Q8WXH0	SYNE2	247999	207871	288787	164372	126681	167117	119530	124689	124019	0.494507	0.00294521	0.0184881
Q9NZI8	IGF2BP1	1079009	980198	1220766	841394	507593	791682	681294	495212	405630	0.482363	0.00942124	0.0367358
P23378	GLDC	872909	879355	1013785	634645	564279	698045	489960	469541	368860	0.480238	0.000494614	0.0092231
Q15758	SLC1A5	143327	155242	170599	97505	100992	102037	83947	71173	67622	0.47476	0.000110079	0.0051327
Q15417	CNN3	1418303	1309344	1721191	861440	768521	847348	678659	724146	671491	0.466256	0.000576542	0.00975072
O43347	MSI1	489427	422300	598525	297626	227570	336855	277723	222812	203466	0.466148	0.00491064	0.0247091
Q8WX93	PALLD	348246	292742	431234	221671	167780	205614	177041	160487	141661	0.446912	0.00356319	0.0204132
P05362	ICAM1	11498	11543	16736	6285	7225	7624	5698	6298	5746	0.446037	0.00496504	0.0248338
P08243	ASNS	1468405	1509019	1720615	987872	1059803	1036458	682708	684155	726700	0.445625	3.95e-05	0.0038875
P02511	CRYAB	596639	647640	719942	518350	460139	416739	280092	298825	285944	0.440307	0.000225476	0.00675748
Q9UKG9	CROT	315134	281043	412546	275287	155207	218344	168032	150114	125621	0.439929	0.0142259	0.0474697
Q9Y617	PSAT1	1815017	1575523	1788165	1202852	1018401	1194863	802722	738503	664731	0.425967	7.54e-05	0.00441264
P09382	LGALS1	169696	171878	171475	89996	77033	88724	77594	73938	63081	0.418309	1.9e-06	0.0018069
Q03135	CAV1	126579	135407	144206	79226	67366	71723	55969	52378	58637	0.411096	1.19e-05	0.00272896
P09486	SPARC	14465	11867	13667	8008	7577	7792	4758	5238	6347	0.408585	0.000110805	0.0051327
Q14894	CRYM	704318	559941	470422	379741	345802	382258	228179	213404	260828	0.404922	0.00286786	0.0183145
Q9NZN4	EHD2	364274	300605	319211	212944	195054	216434	117128	117566	160271	0.40135	0.000197484	0.00642437
P17661	DES	1866644	1742933	2190929	1115579	957863	1100184	805600	837144	683869	0.401105	0.000197595	0.00642437
Q01581	HMGCS1	260406	261684	325891	176428	168104	174544	111828	107476	113086	0.391978	0.000207667	0.00667449
Q53GG5-2	PDLIM3	116405	77595	127511	54869	39442	48762	44034	34543	33230	0.347755	0.00371662	0.0210584
Q99439	CNN2	161636	166563	169798	90460	76369	97689	55078	57853	57357	0.341946	2.86e-06	0.00181324
P19971	TYMP	49398	39009	52702	20749	19523	22195	13299	14487	17430	0.320433	0.000235999	0.00690569
P29373	CRABP2	97253	118931	128858	64873	35347	77897	41077	33345	32255	0.309171	0.00230883	0.0169225
P41219	PRPH	1592540	1309572	1664862	815556	639327	681702	465669	485997	397760	0.295475	0.00010131	0.0051327
Q16527	CSRP2	16005	12443	17665	7733	6077	6328	4387	3795	5424	0.295058	0.000516109	0.00939368
O14745	SLC9A3R1	86789	72213	110047	39116	36957	42313	25024	27636	21908	0.277154	0.00095968	0.0121946
P08670	VIM	67655992	55173263	76363828	33293809	25443330	29623525	19255544	18586443	14488214	0.262711	0.000273384	0.0074021
P04083	ANXA1	17593611	14703823	15380823	7325970	7972608	8349889	3859278	3869196	4405236	0.254491	1.31e-05	0.00272896
P48681	NES	9449650	5678715	8978294	4649854	3849594	4227148	2331187	1809160	1472484	0.232833	0.00251982	0.017242
P54750	PDE1A	48315	73844	32877	134624	142776	87151	126006	191937	144126	2.9804	0.01263	0.0444036
O15090	ZNF536	23736	20562	14682	40430	44087	35243	52803	55598	61257	2.87653	0.000164805	0.00609674
Q9Y646	CPQ	75705	59236	54724	103091	128098	121238	136212	158989	195428	2.58682	0.00246274	0.0171482
O94925	GLS	887960	876392	876686	1444968	1987988	1929496	1750929	2048547	2486325	2.38005	0.00399515	0.021867
P06865	HEXA	1231242	1041586	1187742	2048824	1843857	2060491	2555135	2543732	2780802	2.27699	1.63e-05	0.00272896
Q9UDY2-6	TJP2	1095259	899671	681211	1813732	1883143	1641950	1787549	1904236	2340763	2.2542	0.00174898	0.0148507
O75521	ECI2	1164432	859597	964254	1443990	1578977	1559520	2078631	2311874	2332994	2.24995	6.57e-05	0.00441264
Q9UPR5	SLC8A2	1422277	1423848	873504	2630634	2778067	2067477	2647075	2820168	2887708	2.24618	0.00143251	0.0136917
Q05084	ICA1	1577	1862	1065	3100	3482	2532	3471	3084	3541	2.24156	0.00230401	0.0169198
Q14956	GPNMB	2269921	1476530	1527880	2815707	2925526	2796792	3518693	3443957	4739490	2.2187	0.00537037	0.026002
P10619	CTSA	87042	56969	68393	108274	101290	109985	138386	143457	176658	2.15863	0.00167402	0.0147079
Q8WWI1	LMO7	177710	134286	94179	217069	220369	197339	248937	314335	290344	2.1016	0.00352356	0.0202778
Q13427	PPIG	15089	11366	11863	20226	20756	21039	21963	27932	29807	2.08001	0.00208091	0.0160564
Q9UHL4	DPP7	2197586	1714114	1587827	2715813	2714098	2726620	3280953	4019606	4032395	2.06071	0.00078327	0.011521
P07686	HEXB	2469990	2098590	2314340	3747872	3754141	3838867	4612823	4547090	4979084	2.05421	8.12e-06	0.00272896
Q53EL6	PDCD4	237908	228500	152475	336315	326527	333000	410393	420340	430481	2.03789	0.000245616	0.00702499
Q01860	POU5F1	493912	607125	547551	645597	758724	743244	1107521	1239501	1006359	2.03409	0.000414844	0.00863946
Q02318	CYP27A1	35879	26271	25607	40832	48038	41868	54917	60024	61142	2.00648	0.000581947	0.00975072
Q96CN7	ISOC1	1073479	1070673	967558	1634947	1666245	1625845	1952636	2012161	2210270	1.98446	2.06e-05	0.00298684
P35030	PRSS3	126638	134544	135408	152155	169774	184816	246032	264877	272263	1.97476	4.13e-05	0.0038875
P13473-2	LAMP2	22708	23156	23568	29633	33368	38877	40128	46361	50194	1.96859	0.00141012	0.0136757
P51398	DAP3	21663	20635	18153	23829	33624	31288	33279	43224	40240	1.9312	0.00523187	0.0256117
Q8NCC3	PLA2G15	37699	35765	39518	54188	66572	64950	65394	71065	78022	1.89836	0.000698809	0.0107622
P56730	PRSS12	228469	208505	136188	280961	298515	296837	359191	346802	379212	1.89337	0.00131505	0.013505
P34059	GALNS	143635	143410	141823	195721	193372	196907	250912	264806	296112	1.89296	7.36e-05	0.00441264
P12235	SLC25A4	1581757	1700681	1714787	1879087	2527807	2488869	2667256	2983252	3705581	1.87226	0.00914639	0.0360548
P82970	HMGN5	37992	33160	26515	48007	39533	47564	59191	62381	60856	1.86786	0.000696633	0.0107622
P51692	STAT5B	31719	29155	25882	38387	39531	34414	48907	50915	60280	1.84543	0.00106908	0.0126416
Q8TB22	SPATA20	2689	2153	2246	2739	3098	3414	4115	4050	4832	1.83366	0.00149244	0.0137643
P55287	CDH11	344839	298388	213202	412091	469012	386283	447636	562156	560040	1.833	0.00774397	0.0325144
P21912	SDHB	844002	829009	847948	1000041	1299172	1159691	1283730	1504440	1781086	1.81251	0.00735443	0.0315759
Q3SY69	ALDH1L2	111878	97467	74719	119597	134035	109967	159262	177489	176156	1.8056	0.00163595	0.0145401
Q9H098	FAM107B	71043	67916	67501	96498	90925	93527	120239	124722	124738	1.79066	5.37e-07	0.00168707
Q4KMQ2	ANO6	142185	126600	110759	186355	195717	187454	204694	227952	243353	1.78108	0.000508053	0.0093147
Q7Z5N4	SDK1	44236	49732	43850	62254	60780	55990	80567	87768	76198	1.77432	0.000162192	0.00609674
O75379	VAMP4	135831	137227	114441	184613	178225	171280	233235	228330	224011	1.76923	2.7e-05	0.00311236
P00403	MT-CO2	852385	889431	928620	1105634	1099170	1248419	1466049	1460817	1758847	1.75466	0.000960789	0.0121946
P28827	PTPRM	50809	45025	39712	68315	66334	58206	73167	75213	84493	1.71804	0.00123718	0.0133127
Q68D91	MBLAC2	59702	75201	57077	85985	96175	100176	103947	103247	122458	1.71712	0.00281577	0.0182163
O60783	MRPS14	61087	59182	59143	76726	84162	81027	92800	105436	109562	1.71559	0.000243053	0.00701639
Q8TCZ2	CD99L2	1665	2063	1339	2098	2132	1870	2423	3348	2858	1.70298	0.0149504	0.0486912
Q9P1Z2	CALCOCO1	61349	54734	57403	92860	86156	80258	96336	97738	101339	1.70281	7.48e-05	0.00441264
Q9BTU6	PI4K2A	100373	86734	95645	134391	142548	137094	144354	150625	185105	1.6979	0.00273375	0.017868
Q7L1I2	SV2B	28671	33710	23954	30269	41621	38106	44146	49901	52413	1.69642	0.00777266	0.0325272
A3KMH1	VWA8	5330	4688	5140	6772	6893	7158	6635	9294	9538	1.6801	0.0130999	0.0453122
P16455	MGMT	23004	21149	21329	28062	26660	27518	36532	34318	39016	1.6778	6.65e-05	0.00441264
P06737	PYGL	496803	463726	517051	646426	738801	739045	763481	782319	931882	1.67685	0.00188755	0.0155754
Q96IU4	ABHD14B	323306	269316	254264	410649	404239	424817	417546	467005	533723	1.67469	0.00304494	0.0188374
P11217	PYGM	502267	469814	522583	653846	745100	744592	770992	789382	938844	1.67209	0.001787	0.0150393
Q7Z4W1	DCXR	89747	98611	97061	126559	138280	134272	148590	157613	170604	1.67055	0.000167997	0.00609674
P46100	ATRX	10775	8733	7494	9378	12078	9963	14385	16916	13763	1.66891	0.00843094	0.0343253
Q9BTY2	FUCA2	85425	74665	90403	128043	119920	139577	134353	141472	141491	1.66598	0.000257212	0.00720001
Q9BSH4	TACO1	119675	113748	112648	134606	150382	172786	194184	191983	189817	1.66435	0.000526873	0.00944422
Q96BW9	TAMM41	394766	412180	398455	596519	634216	574586	631902	663639	700818	1.65618	5.08e-05	0.00419249
Q86WA6	BPHL	2015565	2076568	2028286	2631577	2963588	2668300	3023630	3705972	3355366	1.64776	0.00109002	0.0126416
P51553	IDH3G	72912	69220	67311	91340	101524	104476	105629	108030	131176	1.64644	0.00270469	0.0178313
Q9Y2E5	MAN2B2	43983	36198	42276	51639	54151	56336	62633	66898	72017	1.64587	0.000481841	0.00916462
Q9H1E3	NUCKS1	38173	31387	32476	49551	41800	39312	52181	65533	50218	1.64581	0.0128317	0.0448147
P33121	ACSL1	830800	782016	766111	960738	1120267	1050208	1183586	1314350	1413612	1.64425	0.000890683	0.0118696
Q8NDX5	PHC3	15474	15101	12266	17814	20996	16672	21949	25008	23367	1.64151	0.00286547	0.0183145
Q16795	NDUFA9	382208	360847	401939	500378	544863	530947	543466	612010	716471	1.6349	0.00415102	0.0222214
Q6ZVF9	GPRIN3	637750	602467	405546	780784	798574	790598	834855	910383	940757	1.63207	0.00447825	0.0231772
O95299	NDUFA10	412317	380118	401061	486932	548019	554270	586236	637835	723481	1.6318	0.00172108	0.0147788
Q9Y680	FKBP7	206978	198839	165209	271830	274607	258410	289837	324488	316788	1.6306	0.000414441	0.00863946
P82933	MRPS9	81151	78959	76891	97874	108257	104364	118981	126510	140826	1.63002	0.000458027	0.00892541
O75306	NDUFS2	50916	51630	55997	75337	74126	76054	83341	84657	90387	1.62975	1.65e-05	0.00272896
P51608	MECP2	164117	238585	180815	234727	238149	228863	322857	351487	271868	1.62157	0.01033	0.0390242
Q9ULD0	OGDHL	239711	250602	239987	302924	334536	343536	365226	387686	430744	1.62078	0.00061938	0.0100982
P40426	PBX3	2998	3107	3304	3711	3680	4023	4707	4639	5874	1.6176	0.00389071	0.0215602
Q9P2B2	PTGFRN	271825	239327	191695	299191	336011	304046	351552	383418	401794	1.61737	0.00305636	0.0188374
P50897	PPT1	136217	125328	128716	146948	169861	177423	204924	199702	224825	1.6129	0.000665327	0.0104812
Q9Y399	MRPS2	6649	6381	5791	7305	7693	8494	8874	10742	10730	1.61235	0.00234465	0.0169696
P11216	PYGB	1650679	1589906	1744508	2189535	2318361	2305278	2636456	2557775	2838253	1.6113	6.04e-05	0.00441264
Q9NZ45	CISD1	160721	170237	159189	208176	238951	233287	243602	255458	289622	1.60907	0.00109538	0.0126554
P20645	M6PR	42545	41014	47347	51136	54742	54634	63544	67588	79450	1.60865	0.00239212	0.0169835
P10114	RAP2A	41291	37791	37718	51990	56518	56458	55275	61516	71065	1.60836	0.00302699	0.0187841
Q8N3F0	C7orf41	17902	18949	18975	25692	26411	28231	29687	29584	30279	1.60409	9.98e-06	0.00272896
P55809	OXCT1	2158547	2316195	2158898	2711479	3365499	3027083	3283096	3313570	4028293	1.60168	0.00564891	0.0266276
P16278	GLB1	70831	53130	59265	76076	70951	76247	90483	88764	114023	1.60059	0.0104248	0.0392681
P15289	ARSA	234200	200707	198533	270665	277338	301379	312037	327416	371466	1.59592	0.00167746	0.0147079
P30048	PRDX3	978363	945440	947323	1198901	1374153	1355087	1460120	1477352	1637168	1.59333	0.000372801	0.008496
Q8N2F6	ARMC10	198763	186877	188549	248000	273148	266537	288961	288899	335061	1.58993	0.000637354	0.0102026
P22830	FECH	339198	300142	276160	412766	452225	406888	439089	500690	512602	1.58643	0.00145198	0.0137056
P08236	GUSB	587809	458797	490894	689594	678120	672549	744398	785242	908795	1.58597	0.00332011	0.019745
O43301	HSPA12A	498375	507188	448304	622310	721604	648327	679449	800279	825567	1.58563	0.00253348	0.0173023
Q5H9L2	TCEAL5	72759	63656	68883	88651	96150	72135	103512	99333	121752	1.5811	0.00903986	0.0358205
P09669	COX6C	298103	285544	284631	356318	350180	346230	418489	438692	514074	1.57928	0.00126923	0.0133743
O75380	NDUFS6	122705	124543	116708	145431	150828	139637	187305	194246	191588	1.57475	3.93e-06	0.00186871
P22033	MUT	512078	457302	472469	590162	623223	615768	709911	752474	794893	1.56554	0.000123458	0.00519087
O95169	NDUFB8	78189	78372	74679	87892	100082	97434	103948	118498	139269	1.56424	0.00813436	0.0335608
Q96BP2	CHCHD1	25826	24647	23624	28630	33440	31105	37969	40157	37421	1.5594	0.000211859	0.00671593
Q6NVY1	HIBCH	395865	386756	338797	522410	512685	436250	542861	628242	574758	1.55683	0.00237605	0.0169835
P50579	METAP2	198601	235949	230948	282213	281229	279065	308733	362874	364114	1.55631	0.00133347	0.013505
O00483	NDUFA4	28890	29048	30194	35893	39281	38177	41312	46974	48431	1.55128	0.000556238	0.00961931
P15848	ARSB	232113	213239	197843	265430	233150	254566	329534	333879	334104	1.55088	0.00012132	0.00519087
P60033	CD81	76766	93526	77351	111915	126706	125881	117221	122882	143812	1.55028	0.00442463	0.0230882
Q9Y4W6	AFG3L2	1009846	956069	930483	1271937	1464439	1297727	1341758	1529109	1613125	1.54813	0.00194945	0.0156093
Q9H078	CLPB	59005	56236	54059	76584	82933	73728	88196	86455	87442	1.5481	5.18e-05	0.00419249
Q9H6X2	ANTXR1	25224	21907	20559	28379	26244	26819	31750	35288	37655	1.54665	0.00170356	0.0147079
P17302	GJA1	33853	30561	29921	38978	37979	31741	44538	51734	49568	1.54598	0.00192604	0.0155828
Q12857	NFIA	32591	36164	29702	46238	49326	46611	49874	48044	54155	1.54456	0.000486192	0.00920136
Q9NY12	GAR1	251738	186159	205832	263580	283651	243706	298807	334518	360062	1.54318	0.00733973	0.0315484
Q13185	CBX3	594628	580294	504007	676016	675071	671809	829642	941203	816971	1.54135	0.000760549	0.0113903
Q8N335	GPD1L	68629	75083	67073	84899	97047	103838	106628	101515	116697	1.5411	0.00228103	0.0169129
O43676	NDUFB3	22345	22133	22699	28081	30867	27644	32814	32693	37921	1.53963	0.000968131	0.0121946
P28331	NDUFS1	827870	815759	789228	1004608	1103004	1046250	1163515	1251318	1330782	1.5396	0.00026059	0.00720001
Q9BV79	MECR	75166	74260	64345	78619	94890	96587	101025	113995	113750	1.53795	0.00315668	0.019121
P57105	SYNJ2BP	19361	22433	21889	24404	29032	25893	30143	32500	35270	1.53751	0.00228769	0.0169129
O75323	GBAS	189927	170220	208507	224410	240487	254652	290821	288251	294425	1.53608	0.000380715	0.008496
P82673	MRPS35	16337	15631	16172	19144	19115	17877	22387	28411	23121	1.5355	0.00448463	0.0231787
P05141	SLC25A5	5600359	5918731	5493431	6476933	7408338	6961003	7933116	8911198	9224425	1.53233	0.000846395	0.0118509
P82912	MRPS11	84655	84971	77276	110145	110439	105361	118147	125481	133553	1.52765	0.000183251	0.00636042
Q9UBB5	MBD2	24340	27288	22466	29937	31817	25544	33468	41737	37929	1.5269	0.00831977	0.0341039
Q9H2U2	PPA2	832539	812763	742776	1016632	1126118	1001600	1125073	1227655	1291515	1.52602	0.000840785	0.0118509
Q07157	TJP1	387191	342565	308595	449409	481915	417661	493335	527552	561347	1.52379	0.00225011	0.0168161
P51687	SUOX	86894	75242	75158	97507	108142	101793	116050	119471	126002	1.52352	0.000367521	0.008496
O76031	CLPX	25266	22238	25156	30922	30263	29928	36214	38188	36240	1.52274	4.65e-05	0.00411363
P49748	ACADVL	1053076	952156	950044	1365195	1432482	1303515	1325396	1473176	1686933	1.5178	0.00420736	0.0223219
Q92688	ANP32B	524426	499076	484240	628908	685068	689957	727630	739082	817330	1.51488	0.000360403	0.00845326
O43813	LANCL1	138054	133090	119291	164963	169632	183681	184677	195696	210740	1.51399	0.000854182	0.0118509
Q9UIJ7	AK3	2088205	1890479	1964356	2234743	2603507	2399632	2701704	2956821	3334611	1.51322	0.00387137	0.0215303
Q9HBH5	RDH14	29819	28348	29602	38694	35499	37134	43747	42592	46352	1.51182	6.09e-05	0.00441264
Q8IXK0	PHC2	34811	34344	34400	38541	37918	37986	50431	55248	50776	1.51084	2.12e-05	0.00298684
P30042	C21orf33	2004636	1880736	1840682	2375975	2520415	2321104	2698498	2957026	2990674	1.50997	0.000191385	0.00642437
O95167	NDUFA3	65535	57605	61253	72817	77888	75271	86956	89855	101323	1.50838	0.00094149	0.0120587
O43678	NDUFA2	106671	105926	91508	125054	124295	114050	145367	153688	159492	1.50786	0.000402019	0.008496
Q9Y2R5	MRPS17	60802	62389	61053	71648	75533	85582	83187	100662	93893	1.50747	0.0034728	0.0201152
Q00765	REEP5	338386	331365	284984	416725	448732	422090	437904	496393	503894	1.50638	0.00122094	0.0132699
Q7Z3D6	C14orf159	369804	330351	297348	453199	492905	440812	447302	502736	552352	1.50615	0.00501704	0.024997
O00754	MAN2B1	1566802	1265278	1418629	1747338	1739929	1694324	1993762	2162234	2245284	1.50593	0.000816707	0.0116358
P31930	UQCRC1	1249309	1440020	1420020	1683481	1739047	1659086	1983093	2087595	2112765	1.50473	9.87e-05	0.0051327
P24539	ATP5F1	1126615	1136830	1101074	1324032	1622063	1609532	1494756	1629917	1935915	1.5041	0.0138281	0.0467902
Q96CB8	INTS12	69657	59904	56586	70787	68658	65113	92371	97452	90041	1.50346	0.000459879	0.00892541
Q9P0J0	NDUFA13	90214	95493	88842	105776	108581	105431	136605	124294	151775	1.5031	0.00133976	0.013505
Q13510	ASAH1	1205852	1153348	1139884	1374507	1392652	1512944	1698847	1827807	1732311	1.50295	7.39e-05	0.00441264
P07477	PRSS1	36277	46732	42830	45442	46266	53326	59029	62391	67626	1.50228	0.00391077	0.0215602
P07478	PRSS2	36277	46732	42830	45442	46266	53326	59029	62391	67626	1.50228	0.00391077	0.0215602
Q8NHM4	TRY6	36277	46732	42830	45442	46266	53326	59029	62391	67626	1.50228	0.00391077	0.0215602
Q96BY6	DOCK10	6221	7087	5961	7812	7687	7551	9741	9057	10125	1.50101	0.000455008	0.00892541
Q92743	HTRA1	53829	47635	48174	74379	86544	79067	132310	132680	135319	2.67518	8.87e-07	0.00168707
P17568	NDUFB7	4173	4933	4410	6132	4887	4988	6274	7271	6722	1.49948	0.00627688	0.0282571
Q9Y291	MRPS33	62873	61352	57751	78523	81983	76124	80234	92155	100466	1.4994	0.00309468	0.0189263
Q9Y5B9	SUPT16H	282537	283972	258659	366234	384369	374266	414949	446267	374556	1.4976	0.000855103	0.0118509
P82675	MRPS5	94434	101140	93261	102614	126826	119405	130441	136514	165169	1.49609	0.0121879	0.0434514
P22695	UQCRC2	871656	920031	879703	1046263	1222588	1091738	1271964	1331274	1391070	1.49522	0.000501936	0.00931397
Q5SSJ5	HP1BP3	4860696	4651705	4776022	6241778	6174738	5937380	7003917	7421405	6937947	1.49515	1.46e-05	0.00272896
O43837	IDH3B	223476	231792	216954	281987	333353	308832	297540	322275	385039	1.49482	0.0099506	0.0382344
P00390	GSR	385675	418850	397603	503366	515092	574068	590256	606493	599957	1.4946	0.000170181	0.00609674
Q4U2R6	MRPL51	79981	74654	75021	89117	100885	96117	104072	115113	123949	1.49412	0.00162791	0.0145025
P61244	MAX	59310	58567	52359	56627	58781	59121	75729	91945	86616	1.49375	0.00105673	0.0126126
P07602	PSAP	186487	212045	165921	200688	227333	234572	257388	304915	280189	1.49258	0.00546805	0.0260984
P14927	UQCRB	2681964	2835362	2512364	3132454	3408517	3031248	3788454	4062508	4132421	1.49238	0.000320975	0.00806567
Q15031	LARS2	139543	124222	115295	160936	186251	168012	175163	191970	197509	1.48958	0.00215183	0.0164369
P11310	ACADM	984939	912868	849043	1265746	1391985	1277743	1204449	1416789	1466897	1.4883	0.00265579	0.0176311
O43181	NDUFS4	32793	34502	33906	37987	38768	35936	48266	51548	50570	1.48599	1.62e-05	0.00272896
Q92552	MRPS27	113720	105295	107141	130613	148044	137837	146799	158368	179032	1.48456	0.00321697	0.0193601
Q5JPH6	EARS2	66457	64801	59837	78299	91132	94510	90629	93727	99201	1.48385	0.00156258	0.0141453
O75880	SCO1	41265	43789	39404	54633	57422	52845	58927	63425	62155	1.48248	0.0001063	0.0051327
Q8N490-2	PNKD	5439	5445	4788	5791	7116	7157	7612	7247	8369	1.48213	0.00611326	0.0278835
Q99714	HSD17B10	233926	266906	245162	313888	321941	349890	346445	360105	398960	1.48193	0.00133067	0.013505
Q9UDR5	AASS	44054	41077	41458	53460	53343	54324	54352	65091	68023	1.4809	0.00335699	0.019789
Q969X5	ERGIC1	172205	171598	182582	224476	213182	226933	251333	254305	273274	1.47974	7.4e-05	0.00441264
Q96TC7	RMDN3	49796	45544	53258	59671	61217	57203	71636	68220	79919	1.47899	0.00150793	0.0137888
Q5VUB5	FAM171A1	33789	30869	29497	38594	43576	41266	44710	46394	48076	1.4782	0.000400892	0.008496
Q9Y2Z9	COQ6	51183	53399	45702	59687	61349	56097	68939	77733	75240	1.47662	0.000741923	0.0111995
Q9UI09	NDUFA12	63156	60050	63767	68109	76283	74356	86963	93765	95164	1.47557	0.000192601	0.00642437
O43761	SYNGR3	11384	12726	11633	13662	15184	16655	15729	18320	18659	1.47464	0.00586901	0.0272726
P78559	MAP1A	1802275	1678228	1768541	2095591	2184375	2154239	2405497	2465476	2868907	1.47453	0.00167109	0.0147079
P48735	IDH2	1499830	1775505	1629131	2053431	1986601	2022678	2421020	2562804	2243145	1.47355	0.000790481	0.011521
Q9HBM6	TAF9B	38938	42475	36674	39377	36306	37149	52334	54374	67263	1.47324	0.00463758	0.0238397
O00217	NDUFS8	232788	238224	216944	249881	279453	260483	315010	338829	358782	1.47193	0.000562579	0.00968349
O95182	NDUFA7	348768	352598	299167	398693	413604	369176	456517	509386	506350	1.47147	0.00125248	0.013353
Q8NBX0	SCCPDH	610628	613677	628726	714833	818858	845272	861669	854521	1006791	1.46947	0.00413366	0.0222202
P50213	IDH3A	528533	515942	487640	623662	676793	626515	690326	762983	795308	1.46766	0.000718177	0.0109717
Q8N0X4	CLYBL	219898	208232	183711	253403	297521	249700	278623	299074	320010	1.46722	0.00521071	0.0256101
P54819-2	AK2	4848290	4716380	4392766	5911042	6657713	5965055	6203946	6939823	7332995	1.46709	0.0021843	0.016585
O75746	SLC25A12	470726	552064	485315	612152	712355	642555	669513	713495	828927	1.4667	0.00923554	0.0363309
O14880	MGST3	69223	68473	66254	78653	78805	88118	97675	101977	99388	1.46624	9.69e-05	0.00511955
O75964	ATP5L	302225	293232	277431	321232	385242	406283	400669	404375	473718	1.46498	0.0100095	0.038291
O00584	RNASET2	99345	102144	94544	116055	113736	113698	137703	152908	142459	1.46291	9.47e-05	0.00507379
Q5JRX3	PITRM1	349810	352631	333250	411440	447189	414812	472195	528066	513283	1.46139	0.000283114	0.00753123
P42126	ECI1	1022385	1014143	999308	1205971	1287666	1221672	1367203	1503401	1564496	1.46092	0.000337793	0.00808154
P09455	RBP1	1067842	975738	986363	1253476	1254674	1580778	1522120	1352922	1549590	1.4603	0.0104702	0.0393954
Q9UPY8	MAPRE3	984301	959072	976398	1163846	1306609	1262788	1358679	1359779	1544977	1.46019	0.00100821	0.0124019
P19404	NDUFV2	205375	216335	194668	241964	236800	227186	293905	300939	304961	1.45983	2.3e-05	0.00300639
Q9P273	TENM3	148249	144433	136866	160957	167485	179579	193848	216719	216477	1.45978	0.000556322	0.00961931
P31040	SDHA	957836	966675	961891	1193006	1398754	1280881	1305050	1412098	1493513	1.45879	0.00135063	0.013505
Q9NSE4	IARS2	415810	377022	388522	465388	556071	519185	531612	581034	610422	1.45855	0.00264265	0.0175746
P49821	NDUFV1	385710	385276	384340	485873	493990	471834	523404	571931	589058	1.45794	0.000140685	0.00569325
P43304	GPD2	370066	398123	371597	465153	528673	510293	505174	560417	595577	1.45744	0.00193412	0.0155828
Q1KMD3	HNRNPUL2	973295	806580	762788	977248	1118319	989365	1216182	1289110	1199809	1.45717	0.00373493	0.0211109
P42704	LRPPRC	1881478	1900805	1793183	2272689	2519738	2376949	2455138	2700732	2965076	1.45655	0.00228973	0.0169129
Q96M27	PRRC1	397519	338592	331704	430779	459724	448588	471063	507292	575434	1.45511	0.00579972	0.0271367
Q86TX2	ACOT1	82428	84725	76266	119134	101950	102883	111015	118506	124588	1.45473	0.00204604	0.0159164
P49753	ACOT2	82428	84725	76266	119134	101950	102883	111015	118506	124588	1.45473	0.00204604	0.0159164
Q92544	TM9SF4	42570	45468	47689	64474	56667	58706	65724	63925	67716	1.45413	0.000393167	0.008496
Q00577	PURA	212233	195468	202677	230816	227320	256359	280835	291617	314694	1.45344	0.000660091	0.0104624
Q9BRG1	VPS25	195949	189439	191299	228057	248730	271769	273425	271477	292377	1.45188	0.000889926	0.0118696
Q16666	IFI16	615889	643250	478946	716176	784863	708457	776996	862744	879654	1.44952	0.00748707	0.03182
O75914-2	PAK3	2719063	2601760	2374368	3341080	3454576	3301761	3638571	3619276	3892686	1.44903	0.0001621	0.00609674
P05165	PCCA	661373	700720	671181	803908	870655	818239	944103	1013963	987944	1.4489	6.45e-05	0.00441264
P35637	FUS	2010831	1899052	1767212	2220294	2345107	2069615	2498888	2829892	2893560	1.44834	0.00195989	0.0156093
Q9Y6M9	NDUFB9	217916	244296	209228	260913	240914	248991	310085	312964	349406	1.44831	0.00104157	0.0125384
P47985	UQCRFS1	2275607	2475858	2242017	2499612	2728460	2524448	3249452	3490314	3377566	1.44668	0.000122768	0.00519087
Q96EY7	PTCD3	207432	207969	196613	244560	264821	242062	267075	311203	306011	1.44488	0.00140114	0.0136757
Q53H12	AGK	80449	90438	88641	108687	100995	112571	127210	122565	124897	1.44367	0.000197125	0.00642437
Q8NBU5	ATAD1	299277	340262	308025	371007	377892	377046	461935	471341	434237	1.44319	0.000161106	0.00609674
Q9NW13	RBM28	5839	5152	4981	6930	6729	6594	7054	7437	8542	1.44209	0.00447075	0.02317
P51531-2	SMARCA2	297303	276364	246266	364033	353450	349012	369595	396864	412529	1.43791	0.00087648	0.0118696
O96000	NDUFB10	257866	277380	264111	304084	306180	310012	369300	393923	386051	1.43775	1.5e-05	0.00272896
P62745	RHOB	196556	235638	202282	265617	265497	283523	316865	293925	300531	1.43634	0.000863255	0.011855
Q9Y3B7	MRPL11	93813	90003	81858	105932	114857	116737	118089	124683	138336	1.43449	0.00247812	0.0171482
P04066	FUCA1	143490	135238	128876	169840	178701	168251	180291	209961	193198	1.43141	0.00114266	0.0128221
Q9NVJ2	ARL8B	211493	196896	197553	246813	226580	265481	287957	276157	303098	1.43118	0.000986222	0.0123815
O75251	NDUFS7	30025	31036	31015	34424	38836	38268	44442	41621	45683	1.43084	0.00039947	0.008496
Q96C86	DCPS	107580	92089	93321	136468	124057	128319	129595	136418	152670	1.429	0.00339974	0.0198353
P09001	MRPL3	56830	54545	60591	68251	78600	72985	76636	81902	87140	1.42864	0.00173964	0.0148507
Q92599	SEPTIN8	81618	72745	67990	97997	87090	97053	107384	101410	108841	1.42852	0.00149801	0.0137643
Q96C01	FAM136A	93291	99957	79714	109251	119567	103977	127694	130059	132078	1.42815	0.00233462	0.0169557
P08559	PDHA1	728331	635654	629777	853104	952491	866203	866720	942458	1037703	1.42789	0.00444093	0.0231099
P11182	DBT	686316	634434	643486	828780	871340	811312	828052	982122	992418	1.42681	0.00301528	0.0187621
Q8WTS6	SETD7	40758	37007	38132	50772	51404	50170	50831	54571	59886	1.42616	0.00105624	0.0126126
Q9UJ14	GGT7	178031	203620	184086	222546	254210	235526	275044	262646	269078	1.42605	0.000666787	0.0104812
Q9NX14	NDUFB11	126030	134932	125885	160987	153678	142158	166216	185305	199662	1.42481	0.00334113	0.019745
P17050	NAGA	494425	517159	545389	645592	570115	655414	787481	743233	686621	1.42413	0.00214628	0.0164369
P10253	GAA	1613955	1312578	1410168	1792950	1694720	1695304	2040898	1973009	2161266	1.42393	0.0014403	0.0136962
Q9Y679	AUP1	54247	51851	54090	62197	59203	58319	70783	78935	78251	1.42313	0.000227381	0.00675748
Q8IYQ7	THNSL1	73798	74555	69896	85503	102899	93878	95583	101690	112655	1.42007	0.00539312	0.0260348
Q86V48	LUZP1	4769	3615	3760	3880	4668	4297	5891	5622	5728	1.41971	0.00610306	0.0278704
Q9Y5L4	TIMM13	130315	125670	122745	135761	157293	153979	174467	166957	195771	1.41841	0.00339319	0.0198353
Q8N183	NDUFAF2	410268	415713	406913	457095	544081	502819	548819	590776	608735	1.41807	0.00149163	0.0137643
O95139	NDUFB6	651390	668205	590996	701281	753339	670342	852554	950399	906143	1.41794	0.00079351	0.011521
P53597	SUCLG1	877205	885959	884187	956299	1078485	1131758	1231655	1269256	1246613	1.41558	0.000463868	0.00895713
Q2TAA2	IAH1	90942	77061	87937	100795	107587	113239	117792	116660	127820	1.41546	0.00169438	0.0147079
Q06587	RING1	57391	57795	51008	69674	69048	65472	77966	78149	79102	1.41532	0.000109348	0.0051327
P43897	TSFM	206515	183241	186839	243883	270470	269638	271218	257441	287137	1.41485	0.000921292	0.01188
Q5T3F8	TMEM63B	7205	7707	8312	9016	10073	10616	10943	11115	10800	1.41483	0.00133159	0.013505
P49411	TUFM	5718693	5692096	5035637	6896130	7309372	6225236	7510571	8269757	7484017	1.41455	0.00287427	0.0183145
P07858	CTSB	348504	281602	302159	367811	361504	418205	431622	417869	469059	1.41435	0.00637008	0.0285226
Q9NPI1	BRD7	30809	28482	25636	31283	34816	33786	37530	43624	38940	1.41409	0.00431564	0.0227063
Q96BM9	ARL8A	117868	114596	111501	141372	122196	148476	165593	154330	166346	1.41372	0.00193228	0.0155828
Q12789	GTF3C1	105321	108173	100644	111071	110316	126605	138778	152675	152387	1.41288	0.000912593	0.0118696
P25440	BRD2	49070	48690	50303	56306	68575	63733	64688	74922	69239	1.41054	0.00487121	0.0245814
Q5VWQ0	RSBN1	7812	8214	7673	9163	10248	9493	12036	10745	10630	1.40981	0.00142256	0.0136757
P51649	ALDH5A1	839858	909090	866179	1096362	1139892	1127437	1177319	1196846	1310076	1.40882	0.00026223	0.00720001
Q9Y5Z4	HEBP2	525903	471653	453321	623798	638493	611688	629289	698560	711691	1.40573	0.00112422	0.0127497
Q9NX58	LYAR	214172	200820	196864	247294	282653	245722	258285	304477	297220	1.40553	0.00547631	0.0261013
Q86UP2	KTN1	3422360	3042459	3076012	3660590	3924468	3679636	4140507	4598514	4669574	1.40539	0.00119002	0.0130457
Q9UFN0	NIPSNAP3A	18300	21133	19183	25046	27338	25475	25159	27617	29576	1.40494	0.0026284	0.0175746
O60313	OPA1	3083333	3031141	2851157	3692890	4253429	3801830	3933312	4244119	4408560	1.4038	0.0016769	0.0147079
P00492	HPRT1	601001	695632	597688	799292	871345	890218	830623	865611	962902	1.40374	0.00329829	0.0196966
Q13423	NNT	2113973	2235196	2075452	2624787	2943689	2656901	2851153	3148528	3016995	1.40346	0.000792556	0.011521
P31937	HIBADH	2298621	2175564	2197973	2682850	2878088	2671172	2921332	3200130	3241311	1.40326	0.000393507	0.008496
Q9UEU0	VTI1B	193880	169142	172072	214603	244745	208905	239880	250276	260589	1.40302	0.00295013	0.0184881
Q96A73	KIAA1191	127136	122989	105794	159459	157025	139408	171895	159991	167473	1.40301	0.00251858	0.017242
P24752	ACAT1	2751281	2718596	2576750	3142652	3768553	3398905	3392487	3865849	4026935	1.40248	0.00690016	0.0302416
Q9C0B1	FTO	94136	100308	90508	126739	123608	129445	138920	124735	135771	1.40173	0.000290249	0.0076478
O75503	CLN5	102791	90869	100120	121752	97488	120535	138991	128780	143964	1.40151	0.00745053	0.03182
Q9NRG7-2	SDR39U1	119355	125233	120306	129653	142116	142648	156456	168153	185697	1.3985	0.00237853	0.0169835
P21953	BCKDHB	217022	210522	196446	227937	238823	261980	287433	294341	290175	1.39738	0.00043955	0.0088783
Q15554	TERF2	35717	35214	34515	43286	39266	36934	53277	51116	42942	1.39726	0.00933043	0.0365736
Q9BUR5	APOO	126614	122160	129094	160579	185487	170277	158272	179666	189329	1.39537	0.00369055	0.0209849
Q14004	CDK13	13573	11968	12772	13517	13042	14036	17427	17200	18813	1.39483	0.000334455	0.00808154
Q5XKP0	QIL1	74695	70871	70768	82753	93760	86387	93284	104133	104026	1.39341	0.00135422	0.013505
A0FGR8	ESYT2	343559	294605	294733	372159	394703	372060	386058	446317	466547	1.39235	0.00742376	0.0318018
O43660	PLRG1	574797	527490	508239	640787	641444	585735	698475	788331	754645	1.39175	0.00142725	0.0136757
Q9Y5J6	TIMM10B	21586	23307	19034	23486	24208	23585	26476	33150	29259	1.39041	0.0115494	0.0419617
Q99963	SH3GL3	166451	202980	163850	198309	219311	214184	246308	247771	247304	1.39023	0.0028798	0.018319
P11177	PDHB	3108768	2810007	2714535	3541987	3920861	3599934	3667510	4082568	4251340	1.39013	0.00320769	0.0193601
Q05048	CSTF1	10217	11089	10670	13357	12219	13237	15051	13701	15698	1.39011	0.00135716	0.013505
Q8N488	RYBP	7864	7637	6673	8958	8514	8605	9602	10980	10227	1.38942	0.00219486	0.016632
O95819	MAP4K4	85797	104006	87578	105505	99304	104291	130270	134941	119639	1.38744	0.00308088	0.0189027
Q8NHP8	PLBD2	774243	738613	784549	914566	882874	994516	1033628	1013552	1137969	1.38641	0.00142001	0.0136757
Q8N6R0	METTL13	128567	119413	112382	148190	142078	150283	155181	153925	189991	1.38499	0.0133605	0.0458695
O95831	AIFM1	2626398	2561607	2437780	3153872	3473875	3277172	3240224	3512177	3800871	1.38389	0.00201096	0.0158444
Q9BQI5	SGIP1	93418	99055	84797	109524	122739	109084	117191	130028	136140	1.38262	0.00559172	0.0264741
Q92665	MRPS31	396426	400272	376309	467187	513344	476608	489872	554522	576897	1.38217	0.00277301	0.0180625
O94826	TOMM70A	1198312	1356229	1237807	1485981	1652579	1546620	1738557	1758890	1743742	1.38204	0.00038529	0.008496
P09622	DLD	1007336	1137231	977934	1192803	1195218	1185136	1435381	1434977	1437381	1.37958	0.000185439	0.00636042
Q9BQC6	MRP63	83454	75564	74313	84867	101857	98027	99105	104423	118269	1.37914	0.0129409	0.0449758
Q8N5N7	MRPL50	67296	73381	60906	79166	83040	82246	86160	93355	98462	1.37897	0.00290069	0.0183443
P11717	IGF2R	293269	297915	288019	322947	311334	314575	391560	417849	402818	1.37878	1.11e-05	0.00272896
Q96RL7	VPS13A	5522	6014	6172	7406	6916	7238	7442	7722	9243	1.3783	0.0119364	0.042887
P10606	COX5B	446432	479375	447949	440521	448040	466516	548509	707162	637658	1.37821	0.00587438	0.0272726
O14662	STX16	97124	104765	85732	117255	103677	108238	130590	133844	131843	1.37777	0.0019187	0.0155828
Q96EY1	DNAJA3	115636	114427	116384	131639	151724	146309	145139	164024	167836	1.37683	0.00336579	0.019789
Q96KM6	ZNF512B	50970	50317	49664	59607	61392	60241	76044	68221	63536	1.37661	0.00232371	0.0169539
Q16762	TST	158662	157712	157206	195508	185170	185230	195439	236764	219721	1.37659	0.00336273	0.019789
O94813	SLIT2	10161	8008	9059	8860	9841	8617	12984	11842	12654	1.37652	0.00289597	0.0183443
Q6UXV4	APOOL	161133	171276	155966	185595	197666	180219	214364	238118	219454	1.37586	0.00084897	0.0118509
Q9NVS2	MRPS18A	55085	52759	47171	56429	60173	61908	66352	73514	73231	1.37469	0.00197664	0.0156975
Q9H6R3	ACSS3	75393	67404	65207	97468	90328	101564	86837	93832	105170	1.3742	0.00510759	0.0252656
Q9P291	ARMCX1	168619	166320	146575	178120	203147	187933	208480	222059	230717	1.37329	0.00263452	0.0175746
Q13084	MRPL28	669380	638771	579867	651102	728511	682035	767898	931979	892720	1.37318	0.00749494	0.03182
Q01484	ANK2	3761377	3608289	3121208	4140839	4956657	4291350	4394816	4918578	5091826	1.37312	0.0136538	0.0465823
P99999	CYCS	1704763	1672903	1466508	1809873	2191480	1998995	2113597	2186432	2350148	1.37282	0.00748084	0.03182
Q9NQ66	PLCB1	848983	869709	816561	976178	1135631	999766	1081060	1159547	1237384	1.37185	0.00401965	0.0218944
Q96GY0	ZC2HC1A	246412	233305	239177	279620	316939	313956	332713	313449	340005	1.37178	0.000848085	0.0118509
P06576	ATP5B	43737818	42712250	40821497	45484883	55979066	48568511	52311391	59256718	63018374	1.37176	0.0148259	0.0484935
Q9ULH1	ASAP1	38234	30876	31721	37616	39054	41257	43341	46072	48885	1.37158	0.00670827	0.0296085
P45880	VDAC2	875459	894866	835360	959523	945194	1053240	1165246	1241178	1166432	1.37118	0.000383449	0.008496
Q9Y277	VDAC3	240967	242652	212958	264569	266621	277797	293059	334235	327613	1.37086	0.00207611	0.0160519
Q9BQ69	MACROD1	247166	244801	223064	284210	294975	289328	333412	320736	326046	1.37084	6.39e-05	0.00441264
Q9GZT3	SLIRP	400883	418553	401844	474163	502604	437681	535209	573585	564503	1.37012	0.000580048	0.00975072
Q9BTA9	WAC	54828	50832	48343	59678	64849	56224	68166	71932	70841	1.36971	0.00131745	0.013505
Q16718	NDUFA5	3561546	3460530	3266506	4024830	4245920	4022679	4415691	4600914	5071291	1.36927	0.00143702	0.0136962
O75940	SMNDC1	4217	5471	4692	4785	5092	4847	6312	7033	6345	1.36926	0.00471416	0.0240707
O75390	CS	2613902	2564387	2504510	3047526	3416201	3266966	3298986	3508706	3711252	1.36916	0.00101746	0.0124262
O95202	LETM1	1265052	1283223	1168890	1555688	1845232	1508624	1518369	1758120	1808740	1.36804	0.015341	0.0496235
P13804	ETFA	2399814	2106197	2037001	2419105	2724747	2526820	2731951	3035863	3182814	1.36797	0.00694016	0.0303104
P29992	GNA11	664874	599430	603637	706153	827226	777719	826945	859306	868512	1.36769	0.00173825	0.0148507
Q5T0B9	ZNF362	8044	7064	6476	8158	8086	7689	10021	10665	8830	1.36749	0.010604	0.0397416
Q8NDC0	MAPK1IP1L	51690	49325	49058	57102	39969	53845	65064	73039	67112	1.36743	0.0129235	0.0449758
O00165	HAX1	40797	39945	34794	44664	49198	46435	48824	54123	55020	1.36725	0.00345931	0.0201093
Q13151	HNRNPA0	439207	377779	367998	419629	445056	440704	509168	553562	557443	1.36725	0.00193129	0.0155828
Q7Z3K3	POGZ	39271	42791	36119	53073	50847	50138	54563	56006	50941	1.36663	0.00105768	0.0126126
O75431	MTX2	110424	117815	111093	129522	119274	133972	155382	155159	152853	1.36561	0.00015789	0.00609674
Q99798	ACO2	3765933	3727415	3733607	4542694	4914081	4815570	4949742	5134478	5241209	1.36506	5.37e-05	0.00425573
Q16836	HADH	197696	192190	189191	244330	274510	264271	240074	255284	292910	1.36125	0.00519394	0.0256101
O15394	NCAM2	325134	350535	300449	393200	413175	441614	436691	419553	470968	1.35968	0.00299821	0.0186971
Q9BWM7	SFXN3	617950	667958	545782	710828	823074	716490	791642	815989	882125	1.35927	0.00956065	0.0371109
Q9ULV3	CIZ1	39217	37188	32000	40736	40502	40371	43088	52046	52199	1.3591	0.0137071	0.0467219
Q9Y2Q9	MRPS28	49650	46454	46355	56845	60144	57079	62518	63170	67919	1.35904	0.000282512	0.00753123
P25705	ATP5A1	39086192	39649855	37711482	44241015	53034043	47215387	47513044	53366168	57374278	1.35901	0.0124145	0.043978
Q15262	PTPRK	15735	17294	14518	16784	19671	19641	21311	22166	21138	1.35897	0.00495407	0.0248338
O95168	NDUFB4	35266	34900	31692	36715	37842	36951	42964	46324	49100	1.35864	0.00108091	0.0126416
P16152	CBR1	998700	957392	1029095	1185140	1250682	1282963	1272533	1336553	1444137	1.35778	0.00106119	0.0126149
Q15785	TOMM34	429068	399846	396496	444887	491333	452782	514841	537454	610120	1.35662	0.00524488	0.0256117
Q9UKV3	ACIN1	434335	370047	360340	450628	447319	445139	516136	557210	506611	1.35651	0.00272362	0.0178383
Q9Y2R9	MRPS7	139694	127903	131851	156381	172518	162192	168719	179933	193143	1.35636	0.00204561	0.0159164
Q14108	SCARB2	357651	335640	340839	434321	459026	443650	457893	454477	490178	1.35626	0.000124177	0.00519087
P46459	NSF	2510252	2558022	2260100	2945692	3191328	3118237	3046464	3199504	3682300	1.35477	0.00798794	0.0332089
P42785	PRCP	512443	488962	511256	633602	553195	619659	649873	677355	721511	1.35439	0.00180072	0.0150973
P07339	CTSD	2769345	2495930	2421398	2824661	2682899	2966152	3490675	3546504	3373242	1.35435	0.000630886	0.0101789
O43795	MYO1B	1623419	1402494	1239090	1814940	1905044	1952367	1786402	1842878	2141103	1.35296	0.0154373	0.0498079
P08574	CYC1	351780	371294	362551	418970	447302	411132	467130	484077	517102	1.3525	0.000570139	0.00975072
P53396	ACLY	1143818	1266123	1161274	1359150	1429688	1512433	1550644	1600665	1676339	1.35182	0.000914758	0.0118696
Q6P1L8	MRPL14	524036	471510	414218	485352	531599	507530	592959	640809	671742	1.35165	0.00642714	0.0286622
P53634	CTSC	816923	855676	748388	895746	764321	883358	1162883	1002032	1101338	1.34914	0.0054054	0.0260511
Q9BZE1	MRPL37	158851	152655	139293	188257	187632	182499	186465	208169	213474	1.34896	0.00206801	0.0160519
Q9P015	MRPL15	184584	181665	174103	200227	196209	199049	231922	249176	247493	1.34836	5.58e-05	0.0043319
Q9BPW8	NIPSNAP1	7038988	7232556	7502945	8926493	10038568	9830582	9462675	9341598	10544142	1.34783	0.00191298	0.0155828
P11117	ACP2	164670	146809	155277	187362	180155	186878	199993	199440	229602	1.34767	0.00350372	0.0202248
Q9BYD1	MRPL13	291450	279427	284042	326136	342857	344491	365034	375926	410858	1.34728	0.000689921	0.010756
Q9UBP9	GULP1	58994	52726	46486	61178	65459	61775	64544	75797	72384	1.34461	0.0135267	0.046398
Q8IYB3	SRRM1	121008	99149	110506	138115	146272	143835	143049	143174	158357	1.34451	0.00305101	0.0188374
Q14966	ZNF638	190613	191688	176658	230595	215740	219179	243695	259339	248337	1.34423	0.000208797	0.00667449
Q9BRJ2	MRPL45	287024	291326	261684	327113	346938	326468	349937	394580	384523	1.34404	0.00166798	0.0147079
O14773	TPP1	469852	391289	472202	522655	458582	472504	590776	610606	590079	1.34359	0.00357117	0.0204281
Q9UGP8	SEC63	32810	29446	33137	36710	33060	37961	40094	43358	44644	1.34282	0.00343815	0.0200286
P03928	MT-ATP8	60300	56756	51394	56497	55348	52307	69817	78148	78158	1.34237	0.00123372	0.0133127
Q96I15	SCLY	85438	77632	75494	97165	96653	95410	106378	102701	110750	1.34064	0.00039469	0.008496
Q14011	CIRBP	4780311	3833865	3778095	4603312	4818413	4671280	5110403	5658005	5840049	1.34023	0.0138188	0.0467902
Q9UKE5	TNIK	223342	221459	192515	258987	266927	239546	282558	286862	284577	1.33999	0.00142541	0.0136757
Q8IW45	CARKD	765257	659229	653452	850767	872363	954399	897105	904813	982388	1.33994	0.00406475	0.0219924
P05091	ALDH2	1032134	997800	933393	1066630	1176416	1175298	1199863	1385632	1383777	1.33946	0.00531353	0.0257815
P07954	FH	2862775	3010273	2771010	3304208	3706065	3392912	3759686	3877620	3939437	1.33927	0.000614514	0.0100982
Q8TAE8	GADD45GIP1	266824	270825	239696	287069	297662	282473	319846	359577	360137	1.33732	0.00217624	0.0165568
P78539	SRPX	115213	146326	115139	142944	134487	130236	174688	165730	162860	1.3361	0.0102811	0.0389533
Q8NEY8	PPHLN1	13186	11170	11417	15342	17046	15009	14425	16459	16910	1.33604	0.00938865	0.0366678
Q9Y6G3	MRPL42	10544	10032	8703	11676	9860	11022	12628	13020	13440	1.33502	0.00655623	0.0291014
P61026	RAB10	652099	658370	686909	792918	842682	843267	859031	839106	967381	1.33451	0.00222147	0.0167336
P30405	PPIF	399151	402996	383777	467221	486059	432296	475075	550093	557026	1.33414	0.00603525	0.0278618
Q5SY16	NOL9	193610	181168	174653	214959	203340	222383	230684	253957	248359	1.33411	0.00118621	0.0130457
Q12931	TRAP1	1298184	1269669	1321033	1471128	1710458	1577049	1591908	1693849	1897733	1.3329	0.00966629	0.0374065
Q13554	CAMK2B	1767929	1783846	1640565	2240222	2127903	2122018	2313716	2279781	2326034	1.33264	6.31e-05	0.00441264
Q15648	MED1	40545	35431	35379	40449	42766	42177	47586	49247	51467	1.33178	0.00126274	0.013353
O60499	STX10	39620	39226	35063	44721	40676	41577	49424	50500	51762	1.33164	0.000748849	0.0112594
P82650	MRPS22	119248	105951	105295	127001	129707	124696	131446	152859	155792	1.33163	0.00756436	0.0319406
O95071	UBR5	106057	106185	101701	120267	116055	122703	136424	142027	139498	1.33129	2.09e-05	0.00298684
Q9HD33	MRPL47	132092	124212	118165	141431	167352	157646	152643	163214	182598	1.3311	0.0149293	0.048664
Q16623	STX1A	18513	20762	17255	22518	24214	25232	23894	24419	26925	1.33094	0.00655358	0.0291014
Q00325-2	SLC25A3	631136	720181	701543	811240	844955	892548	867872	891066	971283	1.32996	0.00290306	0.0183443
Q02218	OGDH	4847260	4762754	4658157	5275441	5677384	5235896	6104092	6524347	6344021	1.32971	0.000186924	0.00636042
O75151	PHF2	104091	93425	92569	114186	107634	105329	125549	137182	122977	1.32964	0.00239155	0.0169835
P40926	MDH2	7904378	8697614	8168474	8884886	9582860	9868933	10958487	10726170	11224153	1.32855	0.000509321	0.0093147
Q9HCC0	MCCC2	693530	753512	699314	818574	880728	818550	913080	984159	953541	1.3282	0.000533782	0.00944422
P40763	STAT3	1439622	1466375	1289355	1682253	1742076	1623149	1689030	1889568	1991866	1.32777	0.00629799	0.0282852
Q96B97	SH3KBP1	210445	207963	180271	238169	257553	227926	243547	280732	270087	1.32686	0.00935493	0.0365736
Q7Z7F7	MRPL55	54631	52833	49195	56254	57818	58547	66235	69346	72189	1.32626	0.000386728	0.008496
P48147	PREP	692562	689356	667460	905468	891647	905433	914371	879962	921977	1.32543	3.57e-06	0.00186871
Q9NTJ5	SACM1L	161696	153600	148501	185728	183058	185273	197328	202558	214480	1.32464	0.000223121	0.00675748
Q9HCK4	ROBO2	79371	73256	65149	85631	85818	91247	92153	96349	99967	1.32461	0.00349905	0.0202248
Q9P2R7	SUCLA2	338226	335579	336755	389793	410085	421411	426796	451839	459522	1.32417	0.000181323	0.00636042
P21796	VDAC1	1817082	1844609	1743346	1930939	2056897	2116052	2293616	2468206	2392541	1.32365	0.000337744	0.00808154
Q14197	ICT1	29914	27997	26462	32981	32145	33153	37816	38021	35784	1.32295	0.000375452	0.008496
Q9UH62	ARMCX3	14930	16788	15920	20398	17660	19297	22109	20271	20571	1.32145	0.00388978	0.0215602
Q96JQ0	DCHS1	124410	102967	105376	125258	112139	120404	150509	143824	145103	1.32061	0.00393958	0.0216563
P50993	ATP1A2	1121857	1301546	1130318	1379840	1538720	1568745	1494405	1476713	1720714	1.32026	0.014107	0.0472386
P13073	COX4I1	599862	650078	580273	665525	675010	580590	788248	799689	826770	1.31936	0.00162289	0.0144917
Q08495	DMTN	69639	65604	58545	73437	79767	72497	77856	86535	91226	1.31905	0.0115803	0.0419939
Q96GK7	FAHD2A	535932	526361	543080	638547	694132	669442	668937	687041	761334	1.31889	0.00167959	0.0147079
O43674	NDUFB5	209279	200371	211082	241169	271663	250226	254172	270283	293131	1.31713	0.00418266	0.0222841
Q9BYN8	MRPS26	96150	101071	98986	118564	122088	114779	121265	131438	137088	1.31594	0.00102485	0.0124262
Q9NX62	IMPAD1	99077	102323	96002	119075	108442	110530	134494	130394	126044	1.31449	0.000424677	0.00868533
P49593	PPM1F	89106	73723	88452	97730	106170	101973	103510	114068	112650	1.31418	0.006668	0.0295117
P78347	GTF2I	1118379	1023839	985545	1204132	1257012	1270186	1316702	1369376	1423423	1.31388	0.000902917	0.0118696
Q8N983-4	MRPL43	64593	62146	64539	73943	80758	81863	81485	81628	88202	1.31387	0.000914768	0.0118696
Q96L91	EP400	44957	46827	46951	52087	49248	53479	61908	61760	58566	1.31354	0.000170334	0.00609674
Q8TAC9	SCAMP5	66696	80916	67406	79116	82308	83539	94532	90705	97000	1.31262	0.00524263	0.0256117
Q8TCS8	PNPT1	104208	111304	108752	122643	128530	122351	136815	147768	141051	1.31262	0.000226222	0.00675748
Q53GQ0	HSD17B12	81935	80558	89443	105788	107940	102408	108725	104709	117189	1.31233	0.00128112	0.0133885
Q9Y6C9	MTCH2	68959	70175	68146	73183	75900	83016	82355	90635	98997	1.31217	0.0096461	0.0373664
Q8NFD5	ARID1B	44267	42945	36386	45976	44358	40722	53270	56522	52378	1.31208	0.00545575	0.0260725
P26440	IVD	270079	244791	244151	310279	348580	322718	290940	347569	357205	1.31184	0.0142843	0.0475395
Q9Y5Q9	GTF3C3	43256	39955	44212	56164	57920	53042	51323	55116	60692	1.31162	0.00407647	0.0219956
P23763	VAMP1	65898	70917	62241	79752	74321	71203	82771	82661	95618	1.31144	0.0112391	0.0413878
O14523	C2CD2L	21728	20681	20662	24858	25784	24336	25519	27556	29631	1.31132	0.00252013	0.017242
P07711	CTSL	30488	31589	32495	33212	26923	29847	40251	42663	41044	1.31073	0.000965879	0.0121946
Q9NU22	MDN1	31366	35732	32820	34516	31895	38338	41139	43290	46468	1.31004	0.00757372	0.0319406
P33316	DUT	588361	675713	585778	676753	699570	654685	816546	842791	763966	1.31	0.00285619	0.0183145
Q70E73	RAPH1	58028	52445	51233	61198	68806	69508	63539	72398	75749	1.30908	0.0150249	0.0488921
O15160	POLR1C	254064	260539	249859	273655	274914	286791	312111	331288	357185	1.30887	0.00126369	0.013353
Q92820	GGH	1158221	1101160	1125782	1313985	1215443	1335764	1474807	1548056	1407248	1.30868	0.000936297	0.0120327
O00178	GTPBP1	69351	65772	66839	78273	75176	77712	87079	90121	86902	1.30768	2.26e-05	0.00300639
Q8TD16	BICD2	144733	140522	138590	157116	158533	150473	171035	193182	189942	1.30746	0.00113286	0.0127497
Q96PE7	MCEE	39591	36863	33656	39201	43599	40539	44375	50245	49343	1.30745	0.00772108	0.0324541
P07305	H1F0	3060587	2643685	2696229	3694978	3267032	3449180	3566847	3979039	3435412	1.30722	0.0114279	0.0416395
Q8IXI2	RHOT1	69134	72611	71168	77730	81563	86715	94538	85906	97682	1.30629	0.0031076	0.0189728
Q9BYD6	MRPL1	15179	13848	16429	18303	19146	18579	17716	20595	21028	1.30542	0.0114082	0.0416078
P10515	DLAT	669759	599292	590814	729823	836666	740514	750146	819997	857440	1.30525	0.01034	0.0390242
Q92785	DPF2	208347	193127	184194	223472	232351	226395	245469	252374	266345	1.30481	0.000885304	0.0118696
Q14166	TTLL12	773896	736041	752837	883061	868201	864633	903603	999262	1049440	1.30473	0.00221955	0.0167336
O95777	NAA38	121829	117359	121606	143758	149601	151958	160137	144779	165653	1.30426	0.00146505	0.0137426
P55084	HADHB	2002581	1699280	1804831	2171016	2346419	2141318	2173191	2458875	2545547	1.30343	0.0126071	0.0443638
O75947	ATP5H	7087817	7082440	6952061	7418614	8568541	7676233	8440691	9563866	9513483	1.30279	0.00609526	0.0278682
Q9NZN3	EHD3	690088	758331	694998	816340	938205	872846	846934	939408	1005971	1.30274	0.0127224	0.0446045
Q92621	NUP205	283214	259426	280421	308471	318068	326271	343715	353023	375462	1.3027	0.000740416	0.0111995
Q9Y276	BCS1L	129596	140169	138468	146766	151815	155099	164097	174111	193213	1.30176	0.00508637	0.0251934
P29558	RBMS1	112336	113291	116483	122054	130466	114646	134349	154175	156792	1.30167	0.00624088	0.0281951
P26599	PTBP1	4802841	4506841	4447516	4936205	5058921	5131754	5709698	5974051	6212427	1.30086	0.000323537	0.00806567
Q96JM3	CHAMP1	179453	198100	157853	203272	203291	193522	234521	240752	220463	1.29945	0.00811551	0.0335608
P49959	MRE11A	164791	158919	134487	171481	165662	163735	185015	202469	206767	1.29693	0.00818079	0.0336793
P78364	PHC1	9349	8804	8284	9755	10362	9054	12051	11426	10788	1.2961	0.00529846	0.0257426
P84095	RHOG	28790	27187	25462	33621	29769	31796	33117	35568	36855	1.29594	0.005048	0.0251014
P12268	IMPDH2	1917658	1926577	1984954	2500301	2343314	2404424	2577343	2466287	2506670	1.29526	4.99e-05	0.00419249
Q9UKV5	AMFR	12206	11228	12341	14499	14399	13787	14184	15230	16914	1.29498	0.00816442	0.0336484
Q6XE24	RBMS3	99862	99299	103120	108758	114981	103263	118142	134542	138704	1.29478	0.00601589	0.0278061
P30084	ECHS1	754430	721058	744501	870499	907020	885131	905951	965529	1001146	1.29398	0.00040073	0.008496
Q09161	NCBP1	15206	13711	12710	16017	15024	16537	19296	17443	17085	1.29301	0.0112239	0.0413878
Q9H492	MAP1LC3A	221793	237429	236645	268071	297015	307917	292261	285659	321776	1.29291	0.00541704	0.0260511
Q9UQ88	CDK11A	311098	251970	298184	336882	353061	338141	349095	385183	379098	1.29274	0.00871888	0.0351341
P21127	CDK11B	311098	251970	298184	336882	353061	338141	349095	385183	379098	1.29274	0.00871888	0.0351341
Q9BTY7	FAM203A	34265	36808	38348	33780	31862	33956	41059	46790	53544	1.29219	0.0105126	0.0394769
P0CB43	FAM203B	34265	36808	38348	33780	31862	33956	41059	46790	53544	1.29219	0.0105126	0.0394769
Q9NVI7-2	ATAD3A	1085461	1097067	1032602	1180615	1296303	1167048	1309014	1402672	1442246	1.292	0.00214832	0.0164369
Q6PML9	SLC30A9	27737	26533	26988	34411	37672	33467	33104	35315	36509	1.29129	0.00147978	0.0137643
P00505	GOT2	7576358	8732570	8106944	8891671	9553202	8918903	10135304	11023977	10361547	1.291	0.0027128	0.0178383
Q04726-3	TLE3	36460	32136	34667	42011	40746	40758	42155	44075	47029	1.29048	0.00201179	0.0158444
P54707	ATP12A	240663	283509	240425	289306	299893	309843	316470	312744	356588	1.28931	0.0139239	0.0467902
O15121	DEGS1	522867	535663	553372	582460	585575	587419	676879	684637	715026	1.28826	3.65e-05	0.0037526
Q3ZCQ8	TIMM50	127726	135672	145388	160534	172251	179874	174738	180475	171315	1.28803	0.00188599	0.0155754
Q7L4I2	RSRC2	141009	131774	144431	155243	141009	154957	168791	176839	191742	1.288	0.00414282	0.0222214
P10109	FDX1	73859	77426	78318	82663	83078	83590	87326	106403	101918	1.28764	0.0100159	0.038291
Q15006	EMC2	369121	378212	408825	431335	418504	417039	475594	486336	525977	1.28694	0.00140299	0.0136757
O14828	SCAMP3	149337	146290	143698	161947	170608	157472	185268	190400	189554	1.28657	7.97e-05	0.00452506
Q93009	USP7	315294	307334	331833	374454	351354	369255	429488	409256	389007	1.28633	0.00108382	0.0126416
Q7L2E3	DHX30	448844	392810	455677	492724	462442	514402	544344	557935	566316	1.28618	0.0032216	0.0193601
P11233	RALA	866322	919629	885709	1106078	1144444	1056193	1089375	1175401	1168645	1.28513	0.000555601	0.00961931
P15374	UCHL3	164727	172653	187316	207593	204255	215690	222695	222051	229140	1.28434	0.00062118	0.0100982
O00429	DNM1L	1025395	1062028	1038380	1233789	1332208	1253668	1280432	1308253	1422965	1.2834	0.00125842	0.013353
Q9HCU5	PREB	45522	43583	52370	54605	54026	53885	57986	60371	63198	1.2833	0.00528703	0.0257426
P52815	MRPL12	1965836	2056141	1804476	2081490	2330726	2140193	2288200	2517652	2665175	1.28226	0.0128781	0.0449022
Q9Y3D9	MRPS23	109840	114441	115910	128116	126531	134733	135660	151511	149032	1.28223	0.00159539	0.0143133
P52948	NUP98	209672	185584	185987	208939	204900	204286	239122	243341	262445	1.28158	0.00195484	0.0156093
P60763	RAC3	152626	141248	163439	180283	193823	203539	199060	178196	208422	1.28069	0.0113188	0.0415604
P05771	PRKCB	94304	83539	74892	103460	103617	105205	101040	110396	112207	1.28056	0.00976416	0.0376702
Q9HD26	GOPC	42215	43330	40848	52491	53965	48434	51991	55919	53884	1.28009	0.00112109	0.0127497
P51991	HNRNPA3	422647	426998	392710	427365	465777	467029	515282	564730	509742	1.27963	0.00308857	0.0189194
Q9Y241	HIGD1A	87487	79826	81531	86564	86258	84363	97509	109597	111277	1.27945	0.00237716	0.0169835
P82909	MRPS36	471226	450840	439384	506865	525676	489491	546225	604614	590794	1.27925	0.00137424	0.0135782
Q14978	NOLC1	473913	413890	479711	433382	456894	434356	513741	629850	605750	1.27921	0.0112372	0.0413878
Q9H6W3	NO66	20353	20351	18994	25183	23415	23138	26179	25134	25029	1.2788	0.000586991	0.00975072
Q9Y2S7	POLDIP2	81536	76110	76488	88335	91939	80693	97619	97776	103991	1.2787	0.00239305	0.0169835
Q4G0F5	VPS26B	57943	54880	58433	70337	75699	76423	70948	68850	79082	1.27809	0.00268542	0.0177349
Q8NF91	SYNE1	455077	441014	406094	505013	513209	504924	508184	582544	573275	1.27785	0.0050749	0.0251934
Q9NX20	MRPL16	82952	78778	74029	87445	99121	88889	94096	100599	106555	1.27779	0.00991935	0.0381529
P30049	ATP5D	2299732	2317645	2237444	2161183	2752959	2422584	2812989	2897009	3048432	1.2777	0.0140838	0.0472026
Q9Y4W2	LAS1L	715833	739241	725212	890062	857128	842812	865950	957499	961720	1.27743	0.00109786	0.0126554
P36957	DLST	857551	832717	778827	894205	929837	864582	1023637	1082435	1046115	1.27666	0.000529185	0.00944422
Q9HA77	CARS2	40732	40040	42459	46204	52279	49429	47764	54216	55332	1.27656	0.00928316	0.0364805
Q9NX40	OCIAD1	80877	83759	84567	96714	93788	97383	104287	106289	107511	1.27642	1.51e-05	0.00272896
Q8IY95	TMEM192	151108	132904	140659	173381	174981	159905	176460	186267	179225	1.27617	0.0020721	0.0160519
Q6IQ22	RAB12	156711	166014	166871	185658	195795	199534	214930	201122	208503	1.27565	0.000448116	0.0088783
Q9Y676	MRPS18B	55184	54740	47124	51738	52965	56976	62160	71131	67031	1.27555	0.00847824	0.0343464
O75489	NDUFS3	578098	628479	560454	655648	711465	636561	708623	768037	776722	1.27524	0.00521089	0.0256101
Q9NVH1	DNAJC11	125958	110375	128502	145570	149415	146574	148194	149129	167923	1.27522	0.00755444	0.0319406
P62873	GNB1	1265627	1389815	1311200	1418080	1294656	1467789	1809458	1652059	1593676	1.27443	0.00583937	0.0271885
P11234	RALB	511455	529378	493308	570385	575687	545089	615942	680575	657401	1.27362	0.000997975	0.0124019
Q96DA6	DNAJC19	310514	339493	303016	347459	360958	333798	391104	405363	417309	1.27361	0.00135097	0.013505
A8MVW0	FAM171A2	68669	65999	58591	75199	82106	76979	81951	83634	80549	1.2736	0.00286966	0.0183145
O43615	TIMM44	542083	550005	534044	572283	677752	646204	640289	698127	730010	1.27199	0.0128216	0.0448147
Q9Y3C6	PPIL1	114516	108944	114302	135057	145089	161772	139403	134566	155576	1.27174	0.0113756	0.0415729
P22626	HNRNPA2B1	2760064	2438002	2141965	2541110	2681944	2581100	2969879	3232167	3132066	1.27167	0.0148725	0.0485476
Q96HA1	POM121	12144	11639	12060	12529	13029	13356	15110	15345	15125	1.27166	2.97e-05	0.00332291
Q13011	ECH1	1108993	1096475	1065771	1197670	1331873	1306001	1313919	1333959	1511963	1.27164	0.00869615	0.0351324
Q8WVC0	LEO1	53638	51205	52719	57858	51944	56169	63656	69530	67172	1.27161	0.00107028	0.0126416
O15042	U2SURP	264062	242143	244993	288471	285995	269368	299684	325691	329784	1.27151	0.00216417	0.016498
P38117	ETFB	1843152	1718529	1701213	1990721	2276454	2131098	2061562	2273892	2355247	1.2713	0.00882847	0.035463
P05166	PCCB	146100	158493	156716	166748	158558	178190	186495	191268	208548	1.27097	0.00494274	0.0248338
Q8TDC3	BRSK1	21099	20118	20213	23994	27322	23897	25332	26207	26524	1.27076	0.00305482	0.0188374
O95140	MFN2	217377	225021	211912	242233	249731	243533	266913	289811	274686	1.27067	0.000332481	0.00808154
P62070	RRAS2	34469	33967	34963	48045	43949	44675	41917	42417	47009	1.27025	0.00126328	0.013353
Q5JTV8	TOR1AIP1	299484	274758	282952	337097	347252	308299	336912	383483	368027	1.26975	0.00808156	0.0335608
Q15555	MAPRE2	1101367	1057572	964393	1152802	1250633	1214151	1257117	1334245	1374034	1.2696	0.00365814	0.0208317
P09471	GNAO1	1968009	2019300	1805417	2087183	2234871	2214509	2338207	2485407	2530298	1.26951	0.00194171	0.0155828
Q9H0D6	XRN2	867720	856374	828966	963274	863044	882377	1072513	1116374	1050572	1.26885	0.000765515	0.0114034
P15586	GNS	1849153	1731935	1709089	2050002	1872823	1847275	2208973	2263278	2239458	1.26871	0.000893397	0.0118696
P05023	ATP1A1	3456069	4085519	3480989	3932399	4325167	4121524	4555198	4521331	4902770	1.26824	0.0111696	0.0412516
Q9Y639-1	NPTN	135175	144285	125108	151596	146001	153393	175148	164736	172807	1.26726	0.00183155	0.0152456
Q08380	LGALS3BP	624835	605978	620773	674429	676904	687231	780517	773370	792539	1.26725	1.45e-06	0.0018069
Q13555	CAMK2G	761730	730505	751662	942842	962814	961923	916329	894100	1032371	1.2669	0.00191509	0.0155828
O75439	PMPCB	216331	210805	234549	260024	273117	262624	263311	281421	293409	1.26668	0.00232648	0.0169539
Q9NR28	DIABLO	79254	85216	73830	81726	90103	79248	99206	108786	93808	1.26647	0.0147923	0.0484252
Q9H0P0	NT5C3A	29497	29816	31490	33038	33050	35194	35847	39025	40125	1.26644	0.00243023	0.0170909
Q9NY27	PPP4R2	35974	35999	41755	46917	47726	44422	47539	47387	49098	1.26639	0.00306283	0.0188374
Q96S55	WRNIP1	113831	108245	114095	129509	142074	140475	138453	142910	144356	1.26638	0.000505821	0.0093147
Q9GZY8-2	MFF	1009348	914891	928703	1037689	1208811	1105782	1174359	1183569	1254845	1.26633	0.00730721	0.0314585
Q16698	DECR1	268954	252797	246985	293583	306984	309744	292661	338926	341756	1.26616	0.00906318	0.0358738
Q9BPX6	MICU1	55286	57283	52587	61356	63736	57823	67386	72621	69089	1.26605	0.00159297	0.0143133
P42025	ACTR1B	305560	309538	279441	255061	294257	307515	378093	343308	411080	1.26599	0.0113679	0.0415729
Q9HC52	CBX8	49981	47002	46154	56316	51192	52141	65192	60024	55600	1.26324	0.0113878	0.0415729
O60563	CCNT1	28592	26988	26610	30714	29618	28163	34605	34162	35049	1.26312	0.000295326	0.00769466
Q9UMS0	NFU1	151589	161936	144876	164245	186962	169691	183343	203709	191335	1.26175	0.00931093	0.0365519
Q66LE6	PPP2R2D	135215	128658	132245	155636	171163	166884	160884	156203	182641	1.26156	0.00748587	0.03182
P0CG12	CHTF8	15425	15410	16531	18949	16921	15966	20612	20648	18467	1.26097	0.0151522	0.04918
Q8WY54	PPM1E	122738	122941	111648	146857	142092	153630	156931	150015	143503	1.26061	0.00169973	0.0147079
P49792	RANBP2	1449919	1379847	1348154	1603965	1618680	1585952	1668255	1772123	1824770	1.26023	0.000631499	0.0101789
Q9NVH2	INTS7	35694	41647	34387	38462	43269	40263	46464	48416	45864	1.2597	0.01364	0.046577
P43155	CRAT	277704	279172	261290	257460	284602	280988	328659	359784	341839	1.25926	0.00108605	0.0126416
Q4VC05-2	BCL7A	33960	31105	29596	32438	31548	31842	41595	40971	36609	1.25897	0.0044043	0.0230453
Q99653	CHP1	87461	88724	89131	101089	113941	102085	101823	115239	116912	1.25878	0.0106333	0.0398069
P78406	RAE1	53919	47080	53302	58711	53662	60566	63618	67594	62813	1.25744	0.00842147	0.0343253
Q12907	LMAN2	471165	427762	458386	491970	515490	487320	568365	569077	567615	1.2562	0.000291517	0.0076478
P12270	TPR	5411621	5186907	4904785	5947657	6120711	5470556	6242747	6681504	6545458	1.25584	0.00326097	0.0195043
Q8WXI9	GATAD2B	23816	21688	20814	22921	25803	24603	27903	27386	27950	1.25515	0.0040701	0.0219924
Q9H9P8	L2HGDH	20211	20255	19260	23655	21825	21461	23111	25876	25939	1.2545	0.00609414	0.0278682
P14866	HNRNPL	3130611	3025470	2750639	3019868	3057739	3050734	3722573	3874224	3561870	1.25284	0.00132176	0.013505
Q6IQ49	SDE2	77782	75419	73332	83983	82055	84692	95616	90413	97529	1.25173	0.000335047	0.00808154
P63000	RAC1	647808	621510	665177	789908	781230	808387	797167	765111	859031	1.25165	0.0012793	0.0133885
Q9P013	CWC15	149971	132552	138777	153779	152754	154821	169690	176155	181406	1.25149	0.00119961	0.013113
Q8TCJ2	STT3B	196389	190497	174406	207361	194866	191439	223152	242828	236378	1.25132	0.00284123	0.0183145
P07741	APRT	2288827	2028814	1950805	2285132	2234357	2402846	2444946	2625256	2772899	1.2512	0.0137748	0.0467435
P07311	ACYP1	341457	380482	338173	404168	449332	443319	443319	424356	457508	1.25004	0.00479419	0.0243812
Q9H2W6	MRPL46	273413	245343	250210	307025	367978	320949	300423	324245	336241	1.24961	0.0139391	0.0467999
P61457	PCBD1	31783	33384	31002	36246	33713	36975	39091	40371	40681	1.24929	0.000890569	0.0118696
Q16630	CPSF6	363386	367348	371145	405059	373972	384376	479061	456205	440543	1.2486	0.000616893	0.0100982
P52306	RAP1GDS1	149110	152651	139600	161915	163676	167556	171104	187385	192498	1.24838	0.00346256	0.0201093
O60502	MGEA5	2817516	2722414	2892227	3657666	3349576	3493162	3618680	3351293	3556255	1.24834	0.000859848	0.0118509
P00367	GLUD1	3607020	3765565	3976340	4120944	4207967	3913682	4616552	4888475	4652160	1.24745	0.00110157	0.0126598
Q86U86	PBRM1	105046	98265	91579	105704	113189	103503	114761	128539	124522	1.24732	0.00946867	0.036829
Q8NC96	NECAP1	135936	139792	135350	161203	167380	160786	177014	164138	171551	1.24722	0.000225569	0.00675748
O95319	CELF2	459226	425579	422388	480123	472433	466035	547759	556525	526063	1.24721	0.000396552	0.008496
Q9BS26	ERP44	742844	763735	775337	869977	781351	854034	976733	985157	883096	1.24675	0.0054258	0.0260603
Q8WUM4	PDCD6IP	2662212	2489318	2354881	2918150	2883026	2682770	3003135	3199269	3149263	1.24582	0.0033947	0.0198353
Q7Z3B4	NUP54	119451	124635	129866	147252	143623	150098	147420	159344	158949	1.24538	0.00100147	0.0124019
Q08209	PPP3CA	361267	340188	344677	399908	433923	422630	423800	401275	476610	1.24428	0.0132021	0.0454897
P48047	ATP5O	1162563	1215406	1128051	1359673	1313180	1282268	1386951	1490948	1484546	1.24427	0.00102158	0.0124262
Q9H019	MTFR1L	269793	247857	253017	288419	319067	294378	311787	319763	327284	1.24416	0.00209813	0.0161305
Q4G0J3	LARP7	161886	143741	146958	148673	165771	162485	182049	192373	188492	1.24378	0.00362452	0.0206712
O94992	HEXIM1	108760	106290	107716	119670	125298	119330	124206	139278	137881	1.24352	0.00259675	0.0175454
Q3SXM5	HSDL1	18870	18753	20399	22156	26128	23936	24051	23815	24263	1.24313	0.0057346	0.0268982
P56377	AP1S2	238004	234377	218929	252274	256470	243636	278743	286345	293880	1.24252	0.000472471	0.00903156
P51648	ALDH3A2	258683	214499	238382	282416	289681	293904	281553	288155	314338	1.2424	0.0100247	0.038291
P98175	RBM10	192845	181756	181557	200217	208783	208799	226638	231293	232087	1.24069	0.000108357	0.0051327
Q13263	TRIM28	4697825	4310757	4214963	4976688	4867293	4590781	5288597	5544442	5572609	1.24064	0.00223829	0.0167938
Q8IY67-2	RAVER1	285472	258127	259057	305445	287179	285954	320857	346028	328885	1.24059	0.00291132	0.0183659
O75694	NUP155	104799	109382	108251	119156	111434	114783	134025	134427	131121	1.23925	8.39e-05	0.00462544
Q9BSH5	HDHD3	30856	28632	32543	34673	36487	36446	34971	39971	39053	1.23866	0.0106582	0.0398268
Q15836	VAMP3	271147	277409	262133	319266	347323	336593	315396	322993	365627	1.23847	0.00725208	0.0313132
Q9NXN4	GDAP2	73942	68079	67109	81440	76591	76732	84671	80526	93565	1.23733	0.0142248	0.0474697
P61421	ATP6V0D1	225809	246734	223914	256571	259666	260988	277369	290110	293893	1.23679	0.000882137	0.0118696
Q9NRX2	MRPL17	320057	326130	313911	381789	386198	341071	383391	418099	385126	1.23593	0.00690054	0.0302416
Q6ZVM7	TOM1L2	388572	359648	356746	422192	438044	423412	442873	436280	486061	1.23553	0.00403782	0.0219114
Q93034	CUL5	402115	350474	391152	453383	449870	467978	438433	465474	509023	1.23536	0.0123127	0.0437324
Q7Z478	DHX29	133802	126577	127765	145048	136318	135772	160184	167585	151255	1.23414	0.00228501	0.0169129
Q9Y6D6	ARFGEF1	63031	54954	58656	67629	67371	66928	68199	74662	75066	1.23373	0.00565898	0.026642
Q9BV57	ADI1	69034	65034	64214	78430	76522	83398	80622	81145	82635	1.2326	0.000694189	0.0107622
O43426	SYNJ1	128551	143023	141488	155924	168315	172253	165952	164769	178049	1.2317	0.00522695	0.0256117
Q5J8M3	EMC4	65749	62899	68848	70119	72253	75286	79724	79539	83969	1.23158	0.00136897	0.0135614
Q12996	CSTF3	224200	209631	218924	226702	222217	237533	252897	273537	277000	1.23084	0.00175961	0.0149077
P63151	PPP2R2A	399469	381357	396764	436772	474955	449160	456087	464059	529187	1.23076	0.0147875	0.0484252
Q9UNK0	STX8	173310	169277	169186	184124	145773	167051	214737	215959	199174	1.23076	0.00889838	0.0355549
Q9H267	VPS33B	280352	288352	290098	354458	374411	364254	340625	338765	376968	1.23004	0.00101067	0.0124019
Q9Y2T2	AP3M1	118818	113754	127910	135955	142526	154610	144545	144950	153782	1.22968	0.00781581	0.0326718
Q8IXI1	RHOT2	39979	41527	41713	49605	42386	47430	48016	50797	52610	1.22889	0.0122066	0.0434673
Q9P0I2	EMC3	168309	162805	167915	180044	178626	170944	204869	205357	202649	1.22814	2.63e-05	0.00311236
Q9NRW7	VPS45	79129	71687	79365	92601	87259	88870	91895	93632	97004	1.22743	0.00170896	0.0147079
P11279	LAMP1	504246	448949	448547	493132	503403	494967	553546	578915	586479	1.22629	0.00229618	0.0169198
P31943	HNRNPH1	3741766	3664652	3511614	4125080	3873050	3870057	4427614	4561827	4397435	1.22613	0.00044738	0.0088783
Q8NFH5	NUP35	163497	143790	138477	157401	142883	148450	175464	182036	189037	1.22607	0.00796255	0.0331395
Q92576	PHF3	133254	124745	121223	145830	141902	128514	152947	158473	153498	1.22598	0.00529139	0.0257426
Q99459	CDC5L	1225545	1193168	1164955	1391236	1297659	1245358	1461437	1518362	1413539	1.22593	0.00289542	0.0183443
Q6P1J9	CDC73	86264	89331	82985	95949	104921	106491	104865	107831	104200	1.22552	0.00190515	0.0155828
Q9NUJ1	ABHD10	99321	95822	105732	106842	125642	117160	125640	119680	123343	1.2253	0.0124476	0.0440063
Q96PK6	RBM14	124116	122351	122501	134952	131495	138296	150091	155061	146926	1.22525	0.000111991	0.0051327
Q9H6R4	NOL6	7731	7179	7477	7645	7500	7166	9071	8809	9541	1.22486	0.000670596	0.0104977
Q9H9B4	SFXN1	1048909	1202148	1064598	1126948	1184096	1173114	1307237	1390231	1360425	1.22386	0.00429357	0.0226259
P60510	PPP4C	53200	51648	56862	56582	55912	59705	63892	67091	66910	1.22375	0.00138555	0.0136193
Q92947	GCDH	30362	33006	30185	37896	35064	37928	38439	37203	38772	1.22299	0.00190733	0.0155828
P20073	ANXA7	1065173	1121677	1050926	1143471	1134721	1175389	1273197	1272946	1413561	1.22297	0.0037705	0.0211861
Q16513	PKN2	114218	124894	110258	113678	119821	123795	134110	144278	148801	1.22274	0.00645907	0.0287709
Q93050	ATP6V0A1	396396	419885	368480	442937	470596	457910	472503	462693	513026	1.22237	0.00845744	0.0343279
Q9NZ53	PODXL2	122448	130400	113514	134101	126118	142701	153626	150528	143570	1.22208	0.0123933	0.0439777
Q9H0L4	CSTF2T	441955	423534	433450	462544	462977	453338	502297	536832	547875	1.22177	0.000602265	0.00996094
Q8WUM0	NUP133	103649	100766	99739	112060	106880	111207	116362	121099	133815	1.22068	0.00756897	0.0319406
Q08211	DHX9	2552221	2427179	2375343	2463047	2396075	2521487	3088598	3009975	2874750	1.22007	0.000456747	0.00892541
O60885	BRD4	156143	154287	149935	165634	165983	165966	187971	195815	177718	1.21969	0.000882802	0.0118696
Q15111	PLCL1	30814	31113	30555	33103	37784	32701	39378	36655	36755	1.21957	0.0125889	0.0443638
P50148	GNAQ	1021759	1002728	1005417	1148431	1179724	1093367	1239847	1208908	1242517	1.21828	0.00021953	0.00675748
Q16594	TAF9	82598	90263	78763	80019	77701	80925	97137	100712	108567	1.21775	0.0028484	0.0183145
Q9C0D9	EPT1	221238	251084	235926	245474	266753	266626	273321	299909	289231	1.21774	0.0102718	0.0389533
Q8IZL8	PELP1	156464	143132	138269	153514	165807	153030	171268	178032	183895	1.21772	0.00676184	0.0298054
Q9HCP0	CSNK1G1	151248	143444	131865	171865	163219	160445	169617	172200	177592	1.21768	0.00406395	0.0219924
Q99719	SEPTIN5	583764	572273	542715	701202	749227	702592	700707	700309	667021	1.21739	0.000416779	0.00863946
O96013	PAK4	84932	82644	83192	95357	83627	93588	101070	97866	105863	1.21546	0.00681374	0.0299647
Q86V81	ALYREF	3042729	2669538	2870486	3246742	3264142	3136811	3432605	3546742	3443799	1.21443	0.00234649	0.0169696
Q5XPI4	RNF123	209382	186177	198473	226561	222753	241971	223887	252031	245459	1.21437	0.0130749	0.0452979
P09960	LTA4H	903682	856344	792815	1017079	916551	922680	1008992	1025050	1064569	1.21379	0.010855	0.0403641
P19086	GNAZ	150526	154844	151990	185593	184782	184773	178361	185513	191167	1.21358	7.27e-05	0.00441264
Q01085	TIAL1	156015	155005	148386	171976	166861	158484	189233	184190	183835	1.213	0.000555703	0.00961931
Q86U44	METTL3	233662	209309	221560	237555	244334	227953	268304	264370	273264	1.21279	0.00170661	0.0147079
Q68E01	INTS3	95512	89440	85093	102735	106104	99207	109338	116107	102000	1.21256	0.0135862	0.0464648
Q92520	FAM3C	80762	83237	86763	92726	88045	87544	105074	100923	97966	1.21216	0.0013005	0.013505
Q14690	PDCD11	5952	6383	5865	6328	6923	6510	7236	7656	7165	1.21192	0.00415336	0.0222214
Q9P032	NDUFAF4	606287	665224	606414	700059	777121	710988	730049	762132	783519	1.21182	0.00788156	0.0329105
Q8IZP0-3	ABI1	453564	402596	407200	464148	468929	450345	494371	512240	523969	1.21152	0.0038524	0.0214845
Q9UJY5	GGA1	103949	99011	98738	104129	106758	108585	120078	114768	130489	1.21093	0.00559547	0.0264741
Q86TS9	MRPL52	83197	85224	81249	84562	75533	86757	101119	102462	98703	1.21073	0.0015928	0.0143133
O94811	TPPP	616943	646051	588208	691199	711698	644466	725153	759032	756640	1.21047	0.00397567	0.0218232
Q6DD88	ATL3	32285	32781	34637	39263	35910	37013	38200	39386	43073	1.21018	0.0117899	0.0425106
Q92896	GLG1	422346	381288	384944	435028	445188	450657	487795	488913	461555	1.21007	0.00248274	0.0171482
O15270	SPTLC2	23451	23866	25680	23758	25517	25100	29497	28200	30617	1.20983	0.00242261	0.0170909
Q969G3	SMARCE1	215364	219927	204140	231047	222100	215476	252370	265230	255980	1.20979	0.000816573	0.0116358
Q2TAL8	QRICH1	62929	63777	61902	68113	62201	70632	73251	75438	79145	1.20798	0.00537919	0.026002
Q9BQ39	DDX50	52240	44186	48769	45711	48029	44636	57309	61281	56801	1.20797	0.00439706	0.0230392
Q9UMX0	UBQLN1	747297	727706	730373	815025	804132	810661	889890	861492	912052	1.2077	7.94e-05	0.00452506
P51116	FXR2	244831	211812	219905	255176	229330	241384	269780	273136	273682	1.20701	0.010308	0.0390167
Q7L775	EPM2AIP1	185703	182151	187915	221999	195060	212939	230017	221573	219159	1.20688	0.00474801	0.024211
Q9BXB4	OSBPL11	32365	28104	29361	30637	29497	29287	34535	36516	37347	1.2067	0.00402318	0.0218944
P33240	CSTF2	670604	643735	626735	718403	707385	676938	768397	817351	753360	1.20506	0.00241582	0.0170814
O14562	UBFD1	169416	172655	169076	193735	204339	192710	187985	208162	219502	1.20445	0.0124977	0.0441422
Q6P996	PDXDC1	198338	175496	197681	203464	197590	204925	235995	225815	225663	1.2029	0.00382882	0.0213874
P09651	HNRNPA1	788831	748519	688665	733205	756286	761730	923242	904806	848460	1.20238	0.0046722	0.0239529
Q6L8Q7	PDE12	273066	289291	298502	314676	301198	307395	341468	327170	365337	1.2011	0.00637334	0.0285226
Q99496	RNF2	140143	145858	136172	149991	139205	140479	174906	169803	161611	1.19932	0.00196142	0.0156093
Q96JH7	VCPIP1	26882	25978	25947	30185	30548	31248	30630	31124	32720	1.1988	0.000337181	0.00808154
P22694	PRKACB	347719	331292	327770	406303	401509	388166	423104	390336	392204	1.19752	0.00148989	0.0137643
Q9BW27	NUP85	130546	123437	117272	130441	127287	123827	145544	141971	157052	1.19747	0.00607291	0.0278682
Q7Z6E9	RBBP6	85176	81423	86103	92755	92332	84191	101668	103415	97457	1.19722	0.0035897	0.0205033
P18754	RCC1	374614	406312	355025	381062	353926	358382	453104	472769	433944	1.19707	0.00376752	0.0211861
Q96EY8	MMAB	94206	98362	96918	107983	107253	103863	109910	115698	120828	1.19673	0.00201888	0.0158667
Q99623	PHB2	664146	677508	682619	749066	734800	692094	761097	811742	849631	1.19671	0.00577215	0.027041
Q92925	SMARCD2	140256	137010	142883	154465	139989	146417	164318	170576	167835	1.19655	0.00111158	0.0127363
P62879	GNB2	662019	698469	677913	704310	598511	688892	854917	805519	777578	1.19604	0.00846466	0.0343279
Q8WWI5	SLC44A1	34485	33633	34358	33507	32753	36288	44340	38240	39913	1.19533	0.0129455	0.0449758
Q92796	DLG3	75635	83321	80723	90339	94028	96935	91161	94328	100898	1.19488	0.00670939	0.0296085
O95292	VAPB	733925	733924	717150	831382	801113	792158	872018	862866	874911	1.19441	4.46e-05	0.00403949
Q14155	ARHGEF7	141894	138764	143399	156347	157826	153172	166936	169057	170044	1.19332	1.38e-05	0.00272896
Q9NZW5	MPP6	482458	490682	445316	521473	505402	514624	550191	562201	580039	1.19315	0.00183028	0.0152456
Q15007	WTAP	55448	49181	55436	59323	53939	54301	64572	65232	61049	1.19235	0.0138802	0.0467902
P09661	SNRPA1	982451	906842	981949	1013034	1021733	1064398	1100743	1175016	1147224	1.19216	0.00255375	0.0173473
O95248-4	SBF1	486336	454128	474222	515812	546930	501841	548009	562620	575453	1.19184	0.00262618	0.0175746
Q8TAQ2	SMARCC2	441336	419324	428915	478351	438202	436820	508222	527185	500765	1.19122	0.00254743	0.0173353
O60613	SEPTIN15	236432	252399	237952	256691	272822	266588	266899	296145	302688	1.19118	0.0137572	0.046727
Q9Y2Z0	SUGT1	526737	541040	510095	606578	604180	608502	578590	634504	665674	1.1907	0.00869997	0.0351324
O95782	AP2A1	874150	862083	904571	961122	948897	1023272	1062438	1009384	1071427	1.19026	0.00223757	0.0167938
O75400	PRPF40A	836724	810389	785716	879799	865244	794691	956673	985719	953092	1.19017	0.00244091	0.0171314
P09429	HMGB1	2586116	2622768	2572239	2942093	2717033	2888539	3254651	3156647	2848953	1.19009	0.0147775	0.0484252
Q9Y657	SPIN1	54976	52115	50462	56671	56500	53591	61515	64850	61134	1.19007	0.00254043	0.0173186
P55196	MLLT4	371855	357902	343897	425946	406388	402438	419132	434211	423787	1.18952	0.00091737	0.0118696
Q9UBL3	ASH2L	97384	96179	96723	102092	97776	102842	105332	118817	121042	1.18914	0.0113537	0.0415729
Q96RP9	GFM1	1172170	1191530	1163521	1334870	1312195	1261075	1316685	1462312	1412435	1.18831	0.00418206	0.0222841
P33527	ABCC1	36516	40292	37336	35242	35961	40537	43126	45049	47451	1.1882	0.0116301	0.0420539
Q9C0B5	ZDHHC5	248382	258998	241178	273388	276098	275498	286214	297244	305613	1.18771	0.000910721	0.0118696
Q8N8A6	DDX51	19132	20041	18392	20199	19712	17198	22643	23794	21913	1.18735	0.0131964	0.0454897
Q14684	RRP1B	134652	140889	134217	140025	132969	138590	160883	169634	155975	1.18727	0.00118868	0.0130457
Q86Y82	STX12	1008636	1009508	1034803	1107080	1158245	1158921	1211751	1149632	1263083	1.1872	0.00239901	0.0169941
Q96KR1	ZFR	81952	90203	74127	76914	74647	74703	101692	101738	88898	1.18696	0.0138916	0.0467902
Q66K74	MAP1S	120769	111300	125234	136978	126759	138198	147298	137408	139136	1.18623	0.0130398	0.0452172
Q7L014	DDX46	529612	525342	494277	570585	534334	551276	600941	632092	603968	1.18575	0.00189544	0.0155828
Q9P016	THYN1	398857	371998	398962	453972	417926	453942	479382	463046	444432	1.18554	0.00686457	0.0301534
P25490	YY1	229103	236284	208163	248544	234976	229280	258512	274894	264339	1.18439	0.0107449	0.040072
Q9H845	ACAD9	247581	236610	220198	276749	287611	260000	267867	274456	291624	1.18393	0.0129873	0.0450763
Q9NR45	NANS	1064975	1076753	1028671	1142640	1107888	1151844	1246481	1215745	1291171	1.18389	0.000574645	0.00975072
Q9HAU5	UPF2	47711	43323	46314	50102	57291	51757	54583	53011	54968	1.18358	0.0147626	0.0484252
Q96AT9	RPE	250006	230576	241828	261629	255857	270922	288873	286478	279437	1.18324	0.00126328	0.013353
Q96H20	SNF8	82668	78885	75501	87303	82073	84294	97118	89597	93616	1.18256	0.00544118	0.0260725
Q14669-2	TRIP12	185090	178385	197340	189195	192498	204557	211030	234496	217320	1.18193	0.0147281	0.0483816
Q8N1F7	NUP93	459675	447930	440487	503480	510349	510224	486267	542732	564041	1.1817	0.0146786	0.0483816
P55795	HNRNPH2	2702721	2611325	2430344	2863087	2698196	2594507	2984713	3183395	2980264	1.18129	0.0117121	0.0422704
P52597	HNRNPF	1487165	1430088	1482611	1601383	1534449	1652031	1654045	1720634	1821354	1.18095	0.00580963	0.0271453
Q96TA2	YME1L1	123993	130587	128476	126039	127883	130651	146715	150266	155300	1.18072	0.000256191	0.00720001
O95208	EPN2	12769	11320	11698	13743	14201	12839	13720	14234	14300	1.18071	0.0122152	0.0434673
Q6ZXV5	TMTC3	69197	68158	73102	66091	72435	70380	80819	84002	83495	1.17989	0.00127541	0.0133885
P19338	NCL	16628827	15871826	15342349	17161552	17009360	16613589	18373551	19703059	18368348	1.1798	0.00311449	0.0189728
Q6VY07	PACS1	253132	266622	265632	296110	307876	308756	305324	305734	315223	1.1794	0.000262355	0.00720001
Q68DH5	LMBRD2	19532	19592	18373	19608	20084	19636	22746	21760	23236	1.17818	0.0010074	0.0124019
Q7KZI7	MARK2	79633	79655	77182	85316	82266	88509	91535	94430	92575	1.17791	0.000638332	0.0102026
Q5VTR2	RNF20	158361	154417	144579	175759	161416	160683	173491	188215	176997	1.17786	0.0152412	0.0493845
Q9UHX1-6	PUF60	1330625	1403137	1394419	1470445	1454561	1528788	1615775	1634309	1612215	1.17783	0.00029994	0.00771037
Q9Y2U8	LEMD3	118484	119369	115201	124041	121863	106764	136479	140154	138907	1.17699	0.00598691	0.0277059
O15269	SPTLC1	79118	85869	74818	77051	66708	64682	96201	101165	84641	1.17598	0.0145982	0.0482885
Q9BQ70	TCF25	61165	56466	54008	59254	56052	56700	65862	65800	70117	1.1756	0.00604653	0.0278682
Q15118	PDK1	52363	48305	48700	58077	68689	65693	55752	60568	59156	1.17479	0.00890742	0.0355549
O15226	NKRF	9055	8798	9103	8013	9093	7491	10802	10464	10383	1.1741	0.00321591	0.0193601
Q9NSD9	FARSB	639058	636855	654399	726665	688883	774945	766697	730004	769531	1.17402	0.00693399	0.0303104
P67870	CSNK2B	879610	913839	952718	948602	927851	1018052	1106629	1036128	1080810	1.17384	0.00749489	0.03182
Q8NFC6	BOD1L1	82170	78635	77415	86789	87073	83149	89364	94146	96112	1.1738	0.00262767	0.0175746
Q8N163	CCAR2	1143001	1092036	1122155	1299819	1185253	1231004	1296935	1303683	1339817	1.17373	0.0024763	0.0171482
O75150	RNF40	203396	199825	182832	208093	203737	195128	225512	240496	221354	1.17287	0.0103408	0.0390242
P61978-2	HNRNPK	4530327	4257173	4216857	4453996	4449013	4590066	4930067	5052917	5265739	1.17259	0.00180183	0.0150973
Q9UBU9	NXF1	45607	45645	43690	50661	47567	44439	52614	52317	53280	1.17244	0.00714913	0.0309741
Q9HAV7	GRPEL1	33034	34715	32638	35658	35395	37280	39788	37981	39887	1.17202	0.0017463	0.0148507
Q5VT52	RPRD2	50847	51178	46195	52520	54223	55803	55993	57776	59920	1.17183	0.00908162	0.0358738
Q10567	AP1B1	231539	228438	232618	260139	270662	281941	255079	267403	288879	1.17148	0.00898516	0.0357494
Q13523	PRPF4B	254674	233121	243042	259249	247661	248562	268332	293012	294376	1.17088	0.00843695	0.0343253
O14776	TCERG1	564014	527142	505748	577718	572668	548457	631592	613282	624892	1.17087	0.00402944	0.0218971
P35658	NUP214	348296	330499	337931	334259	346070	317069	378038	397076	414746	1.17029	0.00298334	0.0186348
Q9Y6W5	WASF2	42649	43435	42395	46911	47488	44521	50145	50699	49402	1.16942	0.000417892	0.00863946
P25685	DNAJB1	1328990	1341302	1385585	1460907	1477723	1464145	1546919	1549235	1645652	1.16912	0.00087132	0.0118696
Q9NYU2	UGGT1	3271787	3307030	3346545	3593188	3549005	3740576	3855850	3813186	3932329	1.16886	0.000218548	0.00675748
Q96Q11	TRNT1	342963	325644	329366	382997	393944	354737	374278	398270	393780	1.1687	0.00789676	0.0329357
Q96T37	RBM15	164788	164654	167098	176420	181603	181909	190159	201789	188199	1.16838	0.00102571	0.0124262
P54803	GALC	629995	576596	626250	646131	686120	635681	718014	689948	733234	1.16824	0.00887502	0.0355549
Q9Y2I8	WDR37	51270	50916	54189	62828	62363	61960	63296	58303	60996	1.16767	0.000858932	0.0118509
Q92973	TNPO1	1477070	1378379	1430948	1580246	1521974	1573746	1625222	1638934	1740206	1.1675	0.00315651	0.019121
Q9BY67	CADM1	266930	276897	252126	299635	337276	307593	309451	299231	320126	1.16691	0.0119506	0.042887
Q9UIQ6	LNPEP	32448	31771	31698	34816	35562	35329	35657	37717	38541	1.16679	0.00113259	0.0127497
P16930	FAH	172828	187157	166356	187372	178611	187043	199503	201232	212905	1.16586	0.0110449	0.0409102
Q6DKK2	TTC19	17870	19381	19649	19610	16663	18185	21380	21593	23363	1.16583	0.0148697	0.0485476
P04181	OAT	688253	691293	649866	767057	875949	835989	756972	795362	812925	1.16549	0.00731054	0.0314585
P29083	GTF2E1	24461	24806	23665	28514	29624	25939	27461	29462	28062	1.16526	0.0153768	0.0496728
P26232	CTNNA2	1821295	1784697	1703139	1956211	2092984	1910116	2072057	2009926	2104393	1.16523	0.0056818	0.0266834
O60716-5	CTNND1	1102305	949408	998181	1115117	1127477	1126325	1157227	1197569	1198896	1.16519	0.01323	0.0455448
Q96KP1	EXOC2	137522	135175	134227	134755	136032	140943	150087	158426	165578	1.16506	0.00251541	0.017242
Q96EP5	DAZAP1	229528	215950	222320	240430	231469	241575	261807	254626	261016	1.1642	0.000584699	0.00975072
Q99729-2	HNRNPAB	694641	747520	647580	648540	652981	665795	818316	827379	785015	1.16316	0.0026293	0.0175746
P30153	PPP2R1A	8270044	7944020	7846233	9165735	9753932	9225167	8690388	9299000	9976279	1.16232	0.0142219	0.0474697
P10155	TROVE2	619696	585326	634193	735779	674809	744140	737351	688561	710063	1.16135	0.00836822	0.0342287
Q8IWX8	CHERP	196939	192825	182386	196169	190942	187785	208941	229514	226000	1.16133	0.00537949	0.026002
P49790	NUP153	295986	278836	285520	300574	335265	305992	323658	332781	342595	1.16121	0.0139062	0.0467902
Q8N6M0	OTUD6B	116415	109314	119719	128202	140964	135069	130933	128576	141509	1.16086	0.0142437	0.0474874
O43752	STX6	333932	349012	345133	339139	367791	345818	404837	374988	413245	1.16049	0.00890351	0.0355549
Q8TB96	ITFG1	140603	135727	141020	139598	152908	144906	163301	166185	154527	1.15973	0.00667194	0.0295117
P13489	RNH1	187734	185276	188881	194186	183240	208199	222648	211999	216773	1.15934	0.00900313	0.0357494
P23786	CPT2	40437	37475	43134	48048	48918	47310	44407	49491	46426	1.15926	0.0118607	0.0426852
O43402	EMC8	176129	176135	180410	194937	203548	187274	198386	208229	210812	1.15911	0.00400226	0.0218744
Q15020	SART3	272920	267496	271961	307306	298199	295155	304619	318136	318544	1.1587	0.000362219	0.00845326
Q13526	PIN1	331300	342816	332386	344996	347497	372470	392743	395533	376494	1.15725	0.00337935	0.0198296
P49902	NT5C2	639677	582986	666709	744954	725939	794437	753127	691777	738919	1.15585	0.0137478	0.046727
Q86WC4	OSTM1	12634	12513	12637	13295	12479	13523	15120	13756	14794	1.15578	0.00888878	0.0355549
Q13332-2	PTPRS	281432	282268	269795	332486	310675	315994	317336	317959	327751	1.15543	0.00115276	0.0128495
O00459	PIK3R2	64964	61000	58955	64892	69234	67063	69908	73475	70164	1.15481	0.00894872	0.0356449
P46734	MAP2K3	79563	83318	82318	90592	93054	85069	94904	92406	95790	1.15457	0.00424825	0.0224449
Q9Y6D9	MAD1L1	71587	73465	70494	75492	73142	69095	78529	87024	83296	1.15451	0.00933842	0.0365736
Q9UBQ7	GRHPR	714743	667676	709583	804895	742815	822006	781078	796845	836530	1.15414	0.0138906	0.0467902
Q4KMP7	TBC1D10B	295124	286681	268041	318098	330131	308958	324570	320359	335852	1.15407	0.00635105	0.0284899
Q14694	USP10	427726	408682	420809	455572	480055	457370	472566	488618	489730	1.15407	0.00103943	0.0125384
P33402	GUCY1A2	156705	148070	162611	150891	142453	155490	174030	175331	189413	1.15274	0.00627304	0.0282571
Q96I25	RBM17	331677	333271	306472	338338	325703	318041	364118	382624	372744	1.15242	0.0037201	0.0210584
Q05086	UBE3A	227181	233468	229431	276967	262925	273520	253273	262531	279175	1.15201	0.00262229	0.0175746
O14787-2	TNPO2	1347752	1227531	1281112	1394629	1338855	1349402	1457761	1451646	1532545	1.15184	0.00618646	0.0280762
Q12824	SMARCB1	155065	149638	149835	145669	148439	157327	173492	173558	176423	1.15166	0.000551019	0.00961931
P05556	ITGB1	575459	609085	580100	575906	596572	578898	635437	693653	703135	1.15163	0.00554871	0.0263183
P52272	HNRNPM	4574868	4306376	4148107	4691593	4372383	4544112	4955193	5140044	4904753	1.15125	0.00843603	0.0343253
P46060	RANGAP1	522885	574556	554048	596794	640644	610860	615044	658023	627586	1.15087	0.0113341	0.0415729
Q9UKF6	CPSF3	49873	52630	49315	53910	53299	55397	58713	57794	58202	1.15078	0.000826183	0.0117269
Q9BZE4	GTPBP4	39185	42295	44892	37042	36194	38582	48316	45100	52005	1.15074	0.00639051	0.0285658
Q12849	GRSF1	240374	248148	256938	230149	232884	226000	283077	287879	286687	1.15049	4e-05	0.0038875
O75382	TRIM3	19384	19021	19175	22870	23975	22358	22317	21076	22844	1.15035	0.00142142	0.0136757
Q13404	UBE2V1	344610	356659	350660	408989	388083	410835	405142	399345	404583	1.14938	0.000348676	0.00828977
O76021	RSL1D1	205185	218837	198223	195552	191415	177312	215905	254531	244362	1.14874	0.013595	0.0464648
P16615	ATP2A2	2023743	1939942	1899665	2255652	2055440	2121382	2226397	2243936	2255977	1.14718	0.00641003	0.0286194
Q9H974	QTRTD1	81529	79273	82686	89595	89135	88888	90188	92672	96429	1.14703	0.00115228	0.0128495
Q99747	NAPG	1058184	1082586	1022937	1118852	1191999	1184624	1164838	1194696	1268417	1.14674	0.0105865	0.0397151
Q99816	TSG101	208364	211006	199050	230120	250618	241821	224884	233611	250402	1.1463	0.0116863	0.0422171
O15020	SPTBN2	940507	863991	863802	942640	958411	963246	990532	999582	1067525	1.14591	0.0126955	0.0445515
Q9NYB0	TERF2IP	337223	333341	322676	356625	350564	343354	402431	366055	368130	1.14435	0.0121488	0.0433528
Q8N6H7	ARFGAP2	658705	647721	618067	716984	674051	713591	713689	734034	753516	1.1438	0.0054864	0.0261013
P46087	NOP2	56453	50665	49246	51062	49826	45897	59279	60971	58588	1.14373	0.00868994	0.0351324
Q6NWY9	PRPF40B	43230	41415	40261	43510	43283	42496	45695	49687	47460	1.1436	0.00612189	0.0278894
Q14241	TCEB3	136285	146227	145611	134263	141714	132730	158826	160117	170595	1.14345	0.00268421	0.0177349
Q13177	PAK2	3281034	3217636	3241365	3662319	3569727	3565720	3698596	3640143	3796997	1.1433	0.000166887	0.00609674
P17844	DDX5	2399354	2181702	2333423	2357108	2320554	2296328	2546528	2730385	2626630	1.14304	0.00544361	0.0260725
P78527	PRKDC	4348643	4317731	4060113	4601075	4441471	4595442	4715047	4900321	4929619	1.14289	0.00306529	0.0188374
O00401	WASL	58493	60903	59104	64796	65440	64631	65865	66321	71450	1.14082	0.00520101	0.0256101
P09110	ACAA1	143460	134476	141622	153627	144930	145534	160727	159945	157664	1.1401	0.00294981	0.0184881
P61106	RAB14	961989	957645	951307	1094749	1094463	1028715	1066183	1073780	1132071	1.13971	0.00334189	0.019745
Q9UNP9	PPIE	94705	90873	94824	97312	87459	95711	106961	107149	105319	1.13918	0.00471364	0.0240707
Q9BT78	COPS4	1108822	1016044	1116606	1209036	1198365	1247306	1198411	1201830	1291592	1.13894	0.0138529	0.0467902
Q9GZT6	CCDC90B	22892	24472	23214	24754	23651	23936	27133	26447	26774	1.13851	0.00140927	0.0136757
Q9UHD9	UBQLN2	314698	300244	302557	342394	353346	348616	338015	337188	369214	1.13833	0.00702328	0.0305332
Q16531	DDB1	2018869	1867768	1916195	2082553	2063535	2041746	2221359	2158871	2223853	1.13808	0.00200642	0.0158444
Q92499	DDX1	3441239	3228754	3240156	3115861	3048868	3471602	3718133	3762682	3791608	1.13746	0.009016	0.0357631
Q13620	CUL4B	161496	169831	157975	174768	176482	182098	184551	185942	185751	1.13681	0.00170421	0.0147079
O43809	NUDT21	1749089	1696444	1791095	1855795	1808896	1906533	2031629	1986462	1929584	1.13578	0.00315327	0.019121
Q13043	STK4	22211	23379	22712	22599	23823	24616	26308	25220	26030	1.13552	0.00619242	0.0280762
Q9Y285	FARSA	876611	841073	792382	894496	943608	921372	915406	966277	965576	1.13434	0.014045	0.0471138
Q8WYA6	CTNNBL1	1790504	1758974	1723165	1803369	1664205	1772257	1972584	2029917	1977756	1.1342	0.00146589	0.0137426
P36551	CPOX	49210	50221	50903	59364	57988	60195	58476	59302	52696	1.13397	0.0061666	0.028026
P26368	U2AF2	1427124	1318075	1350624	1327988	1367528	1390636	1529850	1523725	1589140	1.13352	0.00266197	0.0176413
Q5T8P6	RBM26	198769	185614	186072	203933	190632	183230	217858	213698	214748	1.13296	0.0115661	0.0419822
O00273	DFFA	234113	239398	232703	251683	247005	247746	255789	278502	265664	1.13274	0.00471179	0.0240707
Q9C0E8	LNP	59948	63008	62472	71977	73853	74262	72949	68756	68323	1.13267	0.00076742	0.0114034
P62851	RPS25	849666	874666	895530	914419	854550	901562	975451	1007206	981346	1.13136	0.00249611	0.0172014
Q6DN90	IQSEC1	208656	203606	213326	236008	223699	231275	245996	226615	234751	1.13072	0.00811103	0.0335608
O75340	PDCD6	871328	788832	822515	905935	857594	859814	927924	924971	951708	1.12967	0.0131243	0.0453451
Q9Y5K5	UCHL5	256977	263434	252448	290026	309356	291960	296135	293784	281534	1.12757	0.00233564	0.0169557
Q96CP2	FLYWCH2	14729	15161	13835	14066	13177	14695	16677	16794	15820	1.1273	0.00957936	0.0371456
P45985	MAP2K4	420970	422038	443798	478289	455948	502913	479139	481568	488340	1.12608	0.00974995	0.0376702
Q9UIA9	XPO7	93848	100402	99020	98261	86749	95706	113873	111531	104727	1.12569	0.0145647	0.0482193
P49756	RBM25	679903	655019	643932	645542	683687	649742	714644	756358	754476	1.12463	0.00446732	0.02317
Q8IX12	CCAR1	531218	501244	498572	600150	595167	563913	563625	583959	573998	1.12446	0.00279301	0.0181518
P78318	IGBP1	85909	82125	76371	89850	90812	90668	90964	90182	93674	1.12445	0.0112768	0.0414462
Q92769	HDAC2	56711	55541	54394	57423	60347	61192	61243	60883	65244	1.12436	0.0129465	0.0449758
O75122	CLASP2	724002	725887	784265	873642	868902	877616	824446	809355	875975	1.12337	0.00370964	0.0210584
Q96GM5	SMARCD1	172330	167522	174459	184480	166746	181626	189605	193767	194327	1.12325	0.0133075	0.04577
P62826	RAN	2220464	2162568	2178782	2291419	2183651	2300363	2454351	2408682	2507176	1.1232	0.00148915	0.0137643
Q8NCA5	FAM98A	11679	11669	11289	11868	13092	12286	12721	13016	13136	1.1223	0.0139205	0.0467902
Q14CX7	NAA25	148093	151307	149803	148827	142140	146768	170787	175583	157546	1.1218	0.00752042	0.0318926
A2A3N6	PIPSL	204046	201621	186778	233800	222517	220561	219693	224135	220405	1.12117	0.00513826	0.0253843
Q86VP6	CAND1	1798209	1759334	1865002	2019243	2083741	2123298	2010710	1975589	2093218	1.12116	0.00228399	0.0169129
P47895	ALDH1A3	203266	202946	149577	293141	279816	263034	180342	212711	230071	1.12115	0.00840334	0.0343253
Q6Y7W6	GIGYF2	67594	68338	65994	64189	57068	66738	71731	78454	76190	1.12108	0.0126735	0.0445153
Q92574	TSC1	143137	138441	143818	146187	141602	148774	156178	158873	161601	1.12049	0.00123628	0.0133127
Q02790	FKBP4	2864423	2866547	2864033	3208014	3287631	2995659	3088616	3274942	3255647	1.11916	0.0143045	0.047565
Q9UI12	ATP6V1H	952373	976440	925036	1001587	976504	1020044	1029680	1054113	1108925	1.11874	0.011271	0.0414462
Q5SZQ8	CELF3	118813	123590	119369	131788	127158	126353	135137	131972	136871	1.11667	0.00202543	0.0158667
P23246	SFPQ	1716724	1836801	1731253	1866155	1821323	1794422	1949061	2001723	1948429	1.11627	0.0045985	0.0236983
P68400	CSNK2A1	1762437	1785615	1763881	1902401	1897329	1890491	1958251	1982147	1987497	1.11596	2.57e-06	0.00181324
O94776	MTA2	254341	285459	269282	255325	246804	259096	303482	307081	289170	1.11204	0.00621578	0.0281152
P01111	NRAS	580741	624992	624575	658511	631602	667545	687946	677391	667847	1.11084	0.0135581	0.046422
Q86XP3	DDX42	770790	754647	723734	760431	737930	733782	817078	845267	835991	1.11078	0.00161461	0.0144517
Q13627-2	DYRK1A	57235	56500	56262	57728	57493	54898	61604	63557	63523	1.10993	0.000815839	0.0116358
P49257	LMAN1	512994	515666	529059	534233	506101	520513	571043	587693	569401	1.1094	0.00117995	0.0130457
P23588	EIF4B	649975	592826	608982	615187	594267	612064	674728	693846	684522	1.10871	0.00496807	0.0248338
P08754	GNAI3	460555	439537	463769	495226	491440	500954	499370	499646	511368	1.10743	0.00115672	0.0128495
P55265	ADAR	1274019	1218679	1188971	1322320	1272587	1234136	1333557	1365743	1377473	1.10732	0.0148808	0.0485476
Q16881	TXNRD1	744025	737742	757945	769610	790438	798092	816570	830529	831537	1.10668	0.000447947	0.0088783
Q13153	PAK1	986320	998492	1009270	1078685	1140872	1121402	1126475	1107267	1075699	1.10533	0.002099	0.0161305
Q9BV38	WDR18	54616	51219	50828	53076	50528	50607	56352	58754	57729	1.10323	0.00662271	0.0293622
P19784	CSNK2A2	178616	170538	187518	196936	205790	204248	192857	197182	201235	1.10174	0.00776284	0.0325272
P78356	PIP4K2B	392132	397686	398028	471400	442475	448940	451869	420998	435445	1.10142	0.00353175	0.0202942
Q9UBP0	SPAST	110558	106069	115345	120114	116201	122933	122367	121623	121640	1.10139	0.0133471	0.0458649
Q8NDT2	RBM15B	37408	36954	37793	37636	36152	39776	41030	41150	41016	1.09844	0.0114393	0.0416414
P63208	SKP1	973739	923431	923849	1100707	1086728	1063869	986073	1033617	1073311	1.09641	0.0043865	0.0230155
Q9Y224	C14orf166	2677564	2514348	2626265	2914808	2753529	2877589	2885569	2850165	2820557	1.09441	0.00830197	0.0340676
P16298	PPP3CB	511892	494946	507848	541477	575519	544907	552473	539728	564740	1.09392	0.00811977	0.0335608
O75153	CLUH	58442	57765	56540	53692	55234	54258	60801	61250	66699	1.09264	0.00596016	0.0276157
Q9Y4P8	WIPI2	135261	124483	138885	154883	158249	156043	147389	137895	150015	1.09199	0.00727001	0.031355
O43148	RNMT	514137	526885	551185	594734	568404	588052	597102	567536	573846	1.09187	0.0124165	0.043978
Q96ST2	IWS1	162042	167298	169328	167914	169806	167127	185774	177698	180930	1.09171	0.00256618	0.0174006
O60506	SYNCRIP	3030342	3050939	3099596	3359631	3429322	3563330	3258601	3357361	3404227	1.09142	0.00199841	0.0158374
Q92575	UBXN4	344896	339494	333723	353809	337254	329286	372164	371367	367115	1.09089	0.0052276	0.0256117
Q8N684	CPSF7	392601	364854	393082	371526	374980	371203	415892	406838	429927	1.08876	0.00745811	0.03182
Q9NS69	TOMM22	346401	356570	336008	322955	320165	309098	370079	404303	356784	1.08873	0.0108989	0.0404481
Q15393	SF3B3	575184	560692	576980	601615	565890	602232	629047	615063	618503	1.08743	0.0120069	0.0429672
O75145	PPFIA3	329281	335690	324382	359422	390802	358004	356301	357123	361184	1.08617	0.0128412	0.0448147
P62310	LSM3	84689	85446	79167	79335	73318	80603	92296	91183	86455	1.08276	0.0146567	0.0483816
Q06787	FMR1	318870	299302	306537	322829	314762	312748	331177	339388	329113	1.08107	0.0144616	0.0479617
Q15843	NEDD8	266598	275189	264732	266239	251986	264075	291874	285896	293693	1.08052	0.00224401	0.0168035
Q15637	SF1	664696	646605	630876	655525	648342	647540	688038	698738	706633	1.07787	0.00279625	0.0181518
Q9BYT8	NLN	198835	210751	212759	231255	240735	243824	224609	217048	228722	1.07718	0.00379707	0.0213039
P49720	PSMB3	194976	222288	204933	239273	240512	250235	228242	217898	223563	1.07635	0.0088559	0.0355357
Q8NBS9	TXNDC5	537852	526357	558649	540668	492995	505484	570580	596646	571371	1.07132	0.0151337	0.0491617
Q06323	PSME1	450051	413843	407081	510461	494162	477613	443067	454615	463612	1.07106	0.00746291	0.03182
Q92783	STAM	718764	738346	721616	763096	773485	763463	765922	787653	773072	1.06789	0.00152099	0.0138749
O00560	SDCBP	225100	230858	235676	213124	208682	223322	244659	240561	249301	1.06201	0.00243064	0.0170909
P42285	SKIV2L2	337010	328156	334626	320683	318024	305847	343887	370016	347830	1.06195	0.00770825	0.032436
O43252	PAPSS1	357692	334936	369934	338143	322830	337918	374866	369755	382291	1.06056	0.013889	0.0467902
P30086	PEBP1	8810129	9062356	9227564	10008108	9958253	9755370	9828627	9217654	9691245	1.06042	0.0106424	0.0398069
P62993	GRB2	1197316	1162119	1226085	1279416	1297675	1306876	1249704	1260796	1288524	1.05955	0.00496773	0.0248338
P46782	RPS5	1696941	1685338	1738694	1661619	1563061	1524773	1805696	1843073	1727424	1.04984	0.0104261	0.0392681
Q9Y314	NOSIP	30061	30778	31635	27485	25919	29087	33762	32160	30927	1.04731	0.0109384	0.0405552
P20020	ATP2B1	1583569	1525963	1542185	1712152	1795540	1680852	1590040	1586003	1683894	1.04476	0.0128346	0.0448147
P55060	CSE1L	362346	378820	353751	334587	334096	337828	375270	369938	389278	1.03614	0.0038575	0.0214845
Q9Y5G3	PCDHGB1	25929	25684	25060	23751	23476	22224	25482	27831	25994	1.03435	0.0100541	0.038291
Q9Y5G2	PCDHGB2	25929	25684	25060	23751	23476	22224	25482	27831	25994	1.03435	0.0100541	0.038291
Q9UN71	PCDHGB4	25929	25684	25060	23751	23476	22224	25482	27831	25994	1.03435	0.0100541	0.038291
Q9Y5G0	PCDHGB5	25929	25684	25060	23751	23476	22224	25482	27831	25994	1.03435	0.0100541	0.038291
P23443	RPS6KB1	19115	19307	18692	20103	19893	20134	19371	19688	19737	1.02945	0.00489116	0.0246437
O75592	MYCBP2	32929	32423	33344	32479	32504	32977	33984	33844	33703	1.02872	0.00899828	0.0357494
P06744	GPI	7061590	6651034	6551537	7556311	7936730	8049723	6626604	6884739	7301059	1.02705	0.00790491	0.0329357
O75179	ANKRD17	15987	16102	16147	14672	14655	15009	16076	16834	16561	1.0256	0.000421256	0.00866193
Q12872	SFSWAP	80562	77242	78154	75140	69600	70077	82915	80258	77834	1.0214	0.0115945	0.0420051
Q7Z417	NUFIP2	514925	499619	547039	478398	469271	469717	524914	530450	537566	1.02007	0.00608201	0.0278682
P43034	PAFAH1B1	383779	383161	393693	427843	443556	442463	397197	393151	392757	1.01936	0.00011865	0.00519087
Q01968	OCRL	806938	821756	827001	923371	954808	906119	826120	814816	861219	1.01892	0.0013319	0.013505
P54578	USP14	1139841	1152398	1145998	1193995	1173816	1191472	1173823	1160294	1168217	1.01864	0.00301851	0.0187621
Q8NEF9	SRFBP1	43977	46822	47723	40983	38170	36835	46509	49961	44185	1.0154	0.00952991	0.0370294
Q86V88	MDP1	277965	268754	279406	246829	217258	239921	283260	271309	283589	1.01457	0.00331144	0.0197441
P52789	HK2	85505	88417	89613	95128	96443	99996	89765	86025	90052	1.00875	0.00442462	0.0230882
A6NDG6	PGP	218201	232363	218964	195974	201743	205455	227778	217234	225894	1.00206	0.00695889	0.0303574
Q9Y496	KIF3A	452842	459434	445784	481574	488825	479959	462145	442761	440401	0.990609	0.00422575	0.0223882
Q99611	SEPHS2	12232	11797	10853	10304	9532	9972	11635	11260	11576	0.988217	0.00876314	0.0352378
Q13123	IK	590721	575900	565414	538655	523324	531830	551191	583586	574295	0.986742	0.00984683	0.0379123
Q15181	PPA1	2162066	2221928	2212656	2058683	2054082	2089759	2182672	2109846	2193668	0.983255	0.00825503	0.0339116
O15075	DCLK1	4608017	4987849	4717572	5132844	5307712	5103730	4718721	4697248	4646281	0.982451	0.00776509	0.0325272
Q96PU5	NEDD4L	358162	360441	351810	377255	388190	386477	327244	355348	358305	0.972426	0.0138599	0.0467902
Q96C36	PYCR2	13550	12580	12909	10559	9938	9683	13273	13007	11621	0.97085	0.00259206	0.0175448
P23634	ATP2B4	1370979	1332647	1319898	1464963	1527626	1420367	1264068	1267155	1355660	0.966039	0.00833117	0.0341139
O43505	B3GNT1	22252	21668	22122	19598	17481	19458	21594	21095	20578	0.957981	0.00587895	0.0272726
Q9BZI7	UPF3B	68744	73371	68410	77155	76351	78591	67710	70494	63095	0.956176	0.010076	0.0383292
Q96KQ7	EHMT2	116831	112914	119498	104182	84165	93674	107427	111694	114351	0.954842	0.0122536	0.0435631
P11142	HSPA8	35782028	35181592	35276588	33314282	32554184	31286179	33682281	34212698	33342271	0.952909	0.00434847	0.0228475
P50990	CCT8	7007801	6764809	6928931	6572503	6255107	6407649	6586169	6611990	6471755	0.950167	0.00754719	0.0319406
Q9NVS9	PNPO	951426	988723	986797	893950	842924	879435	892713	913222	959106	0.944685	0.0108517	0.0403641
O43324	EEF1E1	376591	369112	372521	355424	353759	342794	343801	353355	357705	0.943336	0.00717814	0.0310291
Q9H089	LSG1	42066	42933	42486	38204	38132	37775	37813	39745	41928	0.937255	0.0119804	0.0429128
P05198	EIF2S1	534393	553869	568579	550682	582884	582999	505782	520682	524199	0.935915	0.0135421	0.0464091
Q9NXR7	BRE	427975	428378	420566	443309	444681	423247	392352	413753	387859	0.935035	0.0116137	0.0420346
O75037	KIF21B	596826	589715	590177	629483	633226	605788	576150	540263	534701	0.929306	0.00392349	0.0215991
Q13765	NACA	14693017	15594462	15055121	13574510	13246719	13006451	13349486	14061859	14678613	0.928265	0.0108884	0.0404481
O43169	CYB5B	405962	417735	422162	378836	389765	385427	385750	388635	381882	0.928088	0.00129417	0.0134877
P32969	RPL9	1549723	1542128	1594594	1388268	1281225	1352200	1419156	1497090	1411375	0.923434	0.00275531	0.017978
Q12979	ABR	117262	108072	113325	116532	114455	119652	102429	104647	104748	0.920761	0.00629467	0.0282852
P48643	CCT5	8992491	8871871	8903661	8541716	8103008	8215785	8144866	8389817	8073982	0.919331	0.00350921	0.0202258
P62899	RPL31	4175151	3934140	4131014	3730120	3629590	3650326	3583488	3915335	3747885	0.918826	0.0152307	0.0493845
P30040	ERP29	3306946	3287422	3457874	2988886	2976021	3032686	3040885	3023850	3086579	0.910375	0.00071716	0.0109717
P50502	ST13	2313979	2231779	2207511	2169860	2077716	2155474	2020287	2099518	2009295	0.907575	0.00762124	0.0321054
Q07812	BAX	185459	180247	167979	156694	146309	148380	167195	162526	154556	0.907421	0.00919305	0.0362012
P13984	GTF2F2	69907	69300	73265	63969	59549	59319	68177	63399	61031	0.906505	0.0147226	0.0483816
Q02878	RPL6	2546459	2358938	2430094	2174279	1936988	2052226	2093682	2317369	2228373	0.90511	0.0131029	0.0453122
P26641	EEF1G	5501368	5282411	5512040	4856888	4689986	4534708	4935272	4926747	4819486	0.900937	0.000910775	0.0118696
Q16637	SMN1	146211	133488	141819	125649	121414	114059	126598	129546	123426	0.900483	0.00942771	0.0367358
P24941	CDK2	39065	39610	42921	33540	31845	34068	37325	36342	35784	0.90012	0.00237686	0.0169835
P11274	BCR	225241	221967	227757	213426	221454	223064	206189	196253	204971	0.899918	0.00248387	0.0171482
O60841	EIF5B	155688	153934	163045	148870	139262	137140	137389	141309	143312	0.892827	0.00934967	0.0365736
P51572	BCAP31	1100815	1151396	1119807	1011912	993038	950671	981708	1071812	954681	0.892107	0.0137391	0.046727
O43776	NARS	2202955	2068080	2140006	2079441	1906914	1935222	1870638	1914238	1925676	0.890737	0.014685	0.0483816
P07900	HSP90AA1	19975950	18532143	19273943	18400178	18973505	17787879	16926506	16967972	17559961	0.890492	0.0119439	0.042887
P25325	MPST	433512	420519	411017	372859	344636	359903	381317	376004	368643	0.890056	0.00112976	0.0127497
Q9HC35	EML4	127875	122414	129705	113142	108438	117398	117479	112127	107988	0.888419	0.011846	0.0426726
Q8IVM0	CCDC50	138649	139767	129702	126203	119203	122808	121265	121695	119589	0.888344	0.00545463	0.0260725
Q3V6T2	CCDC88A	65411	62832	64028	59383	55531	58597	56927	56297	57279	0.886785	0.00154051	0.013986
P41252	IARS	1128432	1149986	1120266	1096777	1044149	1016149	982871	1033493	992706	0.885363	0.00487235	0.0245814
Q9H773	DCTPP1	85076	91359	85750	77841	79880	77065	74382	81212	76402	0.884856	0.0107984	0.0402324
Q9NY33	DPP3	1618697	1651565	1659732	1526327	1448526	1552635	1499180	1464473	1390325	0.883161	0.00607087	0.0278682
O60333	KIF1B	196342	210503	215031	196578	191036	187161	178749	188198	180742	0.880705	0.0125587	0.0443165
O14530	TXNDC9	102959	101904	100801	87660	95558	92212	87842	89498	91727	0.88027	0.00272181	0.0178383
Q4J6C6-4	PREPL	156465	164516	157041	167718	151235	157296	146138	138450	135700	0.879223	0.0153824	0.0496728
Q96A33	CCDC47	73433	87103	80584	59074	63526	63368	67973	69243	74676	0.878782	0.00873083	0.0351451
Q9UQ80	PA2G4	689192	728158	706087	626118	569575	560611	641163	648607	575498	0.878419	0.0100559	0.038291
P13667	PDIA4	9152798	8223156	8949706	7399522	7164009	7587983	7735015	8134148	7234349	0.877604	0.0128132	0.0448147
Q9NRR3	CDC42SE2	64826	63233	69376	56093	53023	52270	55842	61086	56164	0.876704	0.00481439	0.0244512
P30041	PRDX6	2973528	2723604	2974833	3092614	2875703	2959840	2498776	2595366	2498736	0.875566	0.00554548	0.0263183
P41208	CETN2	506855	448316	499241	470848	478769	474694	421187	428789	419626	0.872931	0.0143688	0.0477014
Q53FP2	TMEM35	31295	33270	33489	34315	40828	36649	29945	25744	29727	0.871112	0.0131838	0.0454897
A1X283	SH3PXD2B	123165	119911	129583	117150	111199	111447	109863	111835	102663	0.870396	0.0113807	0.0415729
Q9H9H4	VPS37B	147567	143556	146014	143321	136643	133553	125250	128853	125975	0.869471	0.00120699	0.0131559
Q9NUU7	DDX19A	879065	862301	898278	860797	805884	812212	759983	781320	753694	0.869434	0.00202714	0.0158667
Q6UUV9	CRTC1	146193	141245	138296	141418	143403	132700	128735	117408	123370	0.867943	0.0089239	0.0355833
P39748	FEN1	185851	205196	199775	166006	158137	175869	173923	175946	162253	0.866796	0.011153	0.0412304
P07737	PFN1	4243105	4284861	4712302	4713527	4262002	4820274	3853934	3823631	3798898	0.866785	0.0141622	0.0473818
Q7Z2Z2	EFTUD1	63613	62031	67782	60075	55517	58523	55353	54279	57993	0.86661	0.012034	0.0430192
Q96CT7	CCDC124	478136	474679	479263	446378	389607	414518	414777	418141	404284	0.863921	0.00583781	0.0271885
P47755	CAPZA2	2783809	2690470	2709839	2462397	2492186	2334743	2333190	2302252	2426266	0.862855	0.00111767	0.0127497
P10599	TXN	7438432	7190244	7510018	6899541	6285347	6334293	6583617	6364644	6135079	0.86199	0.00548923	0.0261013
P11586	MTHFD1	3306175	3286235	3145843	2961358	3188217	3083765	2681004	2801538	2910759	0.86189	0.00581583	0.0271453
P52907	CAPZA1	1497904	1443322	1405659	1290020	1253389	1232177	1289150	1252671	1201920	0.861247	0.00147036	0.0137426
Q13363	CTBP1	115265	113470	108932	100126	86325	85618	103039	97791	89624	0.860179	0.0145471	0.0482032
Q03001	DST	239745	224304	238785	191642	201595	197352	200250	200866	201722	0.857725	0.000397891	0.008496
O14653	GOSR2	100211	97533	104977	91878	87003	86404	86389	85810	87375	0.857469	0.00153199	0.0139419
P39019	RPS19	3755444	3540847	3611182	3320917	3078351	2964395	3059165	3134196	3148805	0.856492	0.00338312	0.0198296
P12081	HARS	389120	376746	365284	345609	307289	329643	328084	324406	312978	0.853528	0.00508057	0.0251934
O75874	IDH1	7029189	7083133	6838598	7325984	6834222	7625798	5941038	5604825	6312119	0.852372	0.00529875	0.0257426
Q15084	PDIA6	4018514	4069180	4340845	3714104	3457735	3838997	3428059	3700978	3452203	0.851366	0.0114541	0.0416553
Q9BRJ6	C7orf50	89664	83142	87023	75653	68162	74889	76275	72340	72221	0.849928	0.00381097	0.021319
P46821	MAP1B	34686559	33959020	35751887	33284366	34902181	31808999	30441425	28751679	29533546	0.849893	0.00355524	0.0203984
Q7L099	RUFY3	1065410	1125236	1192268	1048266	1048841	1089765	986210	938157	949547	0.849538	0.00709016	0.0307888
Q15075	EEA1	4642501	4190986	4361416	4268293	4118240	4022643	3779823	3696057	3715314	0.848145	0.00485258	0.0245468
O95359	TACC2	257718	242479	262289	225683	233788	219107	224011	213432	208341	0.846945	0.00389953	0.0215602
Q96PU8	QKI	1081385	1002213	1090625	929356	846976	881179	870703	925427	889333	0.846022	0.00317303	0.0191895
Q9UJU6	DBNL	843631	785635	790303	726562	722867	749321	681407	660982	700533	0.844333	0.00174647	0.0148507
Q92530	PSMF1	181326	181049	176237	171043	156559	164392	147892	148112	158703	0.84422	0.00297321	0.0186021
P07237	P4HB	16475061	15473482	16845427	14757970	14302268	13833952	14572940	13298118	13225926	0.842255	0.00717344	0.0310291
P35269	GTF2F1	247301	254202	247933	210718	192819	205919	221127	208758	200987	0.841796	0.000912591	0.0118696
Q9BT09	CNPY3	92448	93278	99438	84789	79627	79875	82643	83193	72897	0.837178	0.00912379	0.036003
Q9NZ01	TECR	311456	295199	318593	295229	271609	271648	256083	266153	251077	0.83579	0.00466089	0.0239272
Q9UPT6	MAPK8IP3	187303	185729	199918	169913	172709	184145	157225	160476	158104	0.830448	0.00232431	0.0169539
Q9UMR2	DDX19B	1293469	1237631	1303176	1220705	1159423	1137142	1060589	1065073	1051287	0.828566	0.00053068	0.00944422
O60869	EDF1	359404	375635	373404	293394	297446	317282	304949	314752	297643	0.827597	0.000324408	0.00806567
P49327	FASN	2906909	2810668	2944461	2433212	2552146	2623938	2322157	2278993	2562080	0.826968	0.00401336	0.0218944
Q9BRP8-2	WIBG	461255	435831	442417	401356	376434	371198	342032	383315	382064	0.826733	0.0042329	0.0223949
Q9NP72	RAB18	48870	47995	48412	48122	43642	47145	37618	39553	42784	0.825698	0.00567211	0.0266708
P27708	CAD	288457	286738	287008	262157	235582	259669	233221	239256	239030	0.82522	0.0010879	0.0126416
Q92696	RABGGTA	57472	55757	54937	48952	42572	45229	46075	48978	43346	0.82299	0.00411125	0.0221518
Q9UI30	TRMT112	108587	102932	115926	99111	81594	86736	88254	91100	90125	0.822975	0.0147197	0.0483816
Q9NR46	SH3GLB2	1521513	1560620	1490038	1409036	1386237	1323562	1220450	1259431	1281977	0.822773	0.000352387	0.00832596
Q6ZS17	FAM65A	91572	93265	96344	75408	78591	76115	77694	77946	75685	0.822691	4.19e-05	0.0038875
P28482	MAPK1	1388063	1215689	1366609	1196436	1017326	1073091	1097742	1083478	1080460	0.821507	0.0143706	0.0477014
Q16851	UGP2	934983	942340	957742	828319	818845	853513	801706	787479	738943	0.82119	0.000274368	0.0074021
P53611	RABGGTB	299677	316139	326800	275595	274156	274009	255719	253954	263844	0.820607	0.000491141	0.00921312
Q9HCU4	CELSR2	142944	139407	133019	129611	115173	120306	114172	111358	114298	0.818133	0.00286779	0.0183145
P06733	ENO1	60495908	58973955	58443387	60423049	58801469	63604279	47354990	49103570	48501554	0.81478	0.000147993	0.00586422
Q15773	MLF2	66824	68057	68060	63549	52528	53074	57230	55998	52046	0.814394	0.0146998	0.0483816
Q14974	KPNB1	15149972	14560970	15374212	13948225	12185862	13667137	12174530	11504192	13004826	0.81365	0.00981497	0.0378279
O60568	PLOD3	181111	162092	164385	144224	140621	150591	138228	134838	139773	0.813335	0.00311724	0.0189728
Q92930	RAB8B	210931	199113	216117	190683	171264	180377	170489	170042	167643	0.811571	0.00187125	0.0155081
Q9UPN3-2	MACF1	1520008	1398566	1514329	1308790	1341944	1298426	1228779	1183508	1169196	0.807932	0.000786404	0.011521
Q3KQU3	MAP7D1	413503	378646	400418	362500	378601	350447	315790	307543	339656	0.807493	0.00347416	0.0201152
Q12756	KIF1A	167522	177430	194788	162777	158670	161936	145876	144736	145016	0.807107	0.00560425	0.0264756
Q96AY3	FKBP10	577430	564036	515198	533690	474902	471660	447227	461630	426689	0.806166	0.0124434	0.0440063
Q96T51	RUFY1	36568	33795	33449	31749	31855	31015	29036	28036	26556	0.805572	0.00177479	0.0149696
P68133	ACTA1	41553520	37974696	43126789	38021029	35273679	36904932	33959861	32430862	32337011	0.804922	0.00482957	0.0244956
P43487	RANBP1	700782	769481	743184	710650	658011	685000	585889	606958	588748	0.804896	0.00144378	0.0136962
P68032	ACTC1	41598339	38016859	43164476	38054350	35308323	36935539	33987900	32458431	32368827	0.804817	0.00477661	0.0243243
P40123	CAP2	583488	604874	607017	556905	489100	491288	478286	477466	485736	0.802888	0.00221724	0.0167336
P14618	PKM	21285918	20905280	21315886	20453395	20397766	21637439	16488551	17000518	17438384	0.801918	9.18e-05	0.00498867
P30533	LRPAP1	140151	128126	137937	122306	119120	126418	105169	107650	112745	0.801459	0.00145167	0.0137056
Q9H444	CHMP4B	749844	733866	752531	683059	626011	603569	605410	630060	554646	0.800502	0.00375759	0.0211773
Q9HB71	CACYBP	7008745	7767930	7043775	6330833	6204778	5940516	5606459	6235267	5610647	0.799817	0.00484354	0.0245337
Q92974	ARHGEF2	6653	6012	6386	5515	5018	5193	4985	5499	4709	0.797491	0.00620446	0.0280974
Q9Y266	NUDC	585217	596540	599941	532450	497459	506028	481393	477701	460287	0.796645	8.26e-05	0.00462074
Q86US8	SMG6	28031	24352	28041	21644	20642	23708	21921	21438	20688	0.796367	0.0100897	0.038343
P32322	PYCR1	100169	104280	103943	82043	74309	78323	81706	93254	70540	0.796065	0.010681	0.0398731
Q9UBF2	COPG2	478741	487856	507134	444993	380690	400794	403774	405090	363070	0.795216	0.00560972	0.0264756
P49588	AARS	3940693	3612164	3968615	3460933	3527884	3733108	2969373	3056694	3110813	0.793031	0.00156551	0.0141453
Q58FG1	HSP90AA4P	300710	298946	305797	265586	265611	228807	257831	239660	220552	0.793021	0.00812604	0.0335608
O75347	TBCA	790309	839115	769300	719237	627655	604633	661584	656998	582102	0.792373	0.0102581	0.038944
O15484	CAPN5	915126	967435	964378	761563	801237	868628	745152	766043	743929	0.792122	0.00146783	0.0137426
Q6ZU35	KIAA1211	392886	421261	389886	324012	358676	348017	300247	327072	326144	0.791891	0.00238829	0.0169835
O75832	PSMD10	476910	480175	489756	456214	366668	400029	390933	385716	363228	0.787838	0.010017	0.038291
O95197	RTN3	444324	464300	428908	392334	395155	390157	365921	363386	323881	0.787411	0.0015065	0.0137888
P62736	ACTA2	33115631	31084428	34890068	30254428	27116874	28632546	27138712	25846257	24924130	0.786245	0.00420018	0.0223149
Q96EE3	SEH1L	25881	29961	26374	20159	20318	19232	20473	20342	23825	0.786222	0.00446947	0.02317
P63267	ACTG2	33119922	31087442	34893517	30255853	27118114	28633754	27138829	25846451	24925393	0.786175	0.00419085	0.0222965
O60701	UGDH	875519	866769	927425	754272	722707	800389	711554	663639	723075	0.785953	0.00140835	0.0136757
Q14739	LBR	177435	197464	187740	175755	153556	155076	147396	153414	141028	0.785296	0.00679738	0.0299273
Q8TF05	PPP4R1	78306	84430	75747	68138	63844	65469	61931	63027	62317	0.785276	0.00078697	0.011521
P34949	MPI	2124180	1977860	2021653	1931445	1764396	1904281	1589608	1587395	1623924	0.783992	0.000658405	0.0104624
P14649	MYL6B	389357	326581	374809	304318	287420	302917	288912	280544	285411	0.783745	0.00606276	0.0278682
Q13641	TPBG	120071	118490	127735	95397	76224	82274	105429	90270	90932	0.782512	0.00325926	0.0195043
Q96IJ6	GMPPA	107328	102829	107587	90795	80210	94707	80967	81950	85168	0.78077	0.0024601	0.0171482
A5A3E0	POTEF	8001604	7607938	7886162	6643465	6286020	6408096	6303005	5941113	6063810	0.779203	6.95e-05	0.00441264
P07203	GPX1	1784819	1646652	1830485	1544227	1486661	1409081	1372921	1386383	1340341	0.77911	0.00123888	0.0133127
Q9BV44	THUMPD3	95030	92712	92629	78419	71634	79386	68912	70143	78343	0.775394	0.00132698	0.013505
O14639	ABLIM1	144727	145372	138573	123945	125442	119451	104721	109567	117515	0.774025	0.000439449	0.0088783
Q5T8D3	ACBD5	88652	79251	81523	72463	63632	66365	66427	65343	60836	0.772197	0.00322801	0.0193681
Q9C0C2	TNKS1BP1	1282260	1133005	1156887	1068620	995071	994274	872129	915742	970076	0.772069	0.00399423	0.021867
P23381	WARS	2039348	2217949	2155591	1818423	1835207	1861439	1610734	1674952	1656035	0.770592	0.00012982	0.00535562
Q9Y3A5	SBDS	122439	112398	123762	108190	114367	106071	85295	97767	92851	0.769419	0.00286278	0.0183145
Q1ED39	KNOP1	39173	44478	39065	31143	28984	29855	32010	35645	26468	0.766999	0.0125972	0.0443638
P67936	TPM4	7161296	6639669	6231223	5991538	5932466	5555356	4812076	5414800	5131807	0.7667	0.00460385	0.0236983
Q8N8S7	ENAH	229935	206779	231839	169826	173905	181031	174496	184461	152730	0.765365	0.00429439	0.0226259
O60664	PLIN3	2254210	1992819	2201747	1900396	1737779	1836811	1672530	1644255	1616619	0.765014	0.00169689	0.0147079
Q9UPZ6	THSD7A	182137	174452	176903	152239	130981	136155	155861	135479	116106	0.763734	0.0153318	0.0496235
Q9UI10	EIF2B4	60934	53400	55745	50162	43923	44364	42702	44359	42306	0.760629	0.00380778	0.021319
O95396	MOCS3	94502	85061	89651	78112	69087	71338	77472	65830	61211	0.759667	0.0119782	0.0429128
O14730	RIOK3	296913	272837	314098	244439	229091	210952	231983	235291	203928	0.759409	0.00541454	0.0260511
Q9HAR2	LPHN3	38523	36794	36073	31628	29317	30421	28141	30657	25624	0.757896	0.00190796	0.0155828
P47914	RPL29	308244	284984	285718	256411	199775	203413	220117	226101	219814	0.757762	0.0065089	0.0289589
Q13796	SHROOM2	155891	147322	161330	155363	147324	149463	126886	122804	102114	0.757312	0.00413561	0.0222202
P27361	MAPK3	268613	238421	259283	216663	195519	197948	192115	193957	192405	0.75488	0.000994628	0.0124019
P22234	PAICS	1652533	1653121	1700178	1460608	1235879	1366497	1308790	1264890	1183915	0.750643	0.00134211	0.013505
P18206	VCL	4725811	4082813	4750231	3881326	3355358	3622518	3497149	3337689	3332508	0.749868	0.00502043	0.024997
P00167	CYB5A	62168	58580	56816	47341	50309	51906	41325	43650	47242	0.744616	0.00135098	0.013505
P35241	RDX	1074829	1069306	1056171	956715	834737	872399	799381	802365	774759	0.742587	0.000308351	0.00781978
P12814	ACTN1	2301219	2151018	2157072	1756918	1919998	1853118	1566197	1607487	1724066	0.741038	0.000445947	0.0088783
Q9NYL9	TMOD3	455060	381657	412851	353600	334969	338935	305719	307866	307975	0.737503	0.0024486	0.0171482
Q8WZA9	IRGQ	758890	846303	871575	721315	658416	679970	655749	606202	562422	0.736594	0.0037578	0.0211773
P54577	YARS	1401443	1479841	1547813	1226848	1205175	1198514	1114853	1093716	1051950	0.736159	0.000146028	0.00584727
Q6NYC8	PPP1R18	192370	175911	214821	161030	147788	157523	148941	134642	144969	0.734952	0.00607867	0.0278682
O15344	MID1	44044	37154	42490	37042	34494	37376	32948	28102	29422	0.731453	0.00698841	0.0304512
O75223	GGCT	1520172	1506103	1609379	1283424	1231564	1281923	1200962	1136957	1050285	0.730901	0.000304756	0.00778048
Q9UHC6	CNTNAP2	42147	39926	45556	38476	38839	37642	31574	28375	33120	0.729215	0.00185557	0.0154118
O15540	FABP7	172496	146219	155308	124893	114136	126101	131730	107415	106224	0.728591	0.00943504	0.0367358
Q32MZ4	LRRFIP1	40688	41437	45798	34788	34344	29994	31611	30880	30675	0.728297	0.00149679	0.0137643
Q9UNF1	MAGED2	1113839	1146473	1041089	927947	902098	770283	806609	844161	744554	0.725548	0.00294511	0.0184881
P08758	ANXA5	6670923	6379110	7394751	5734948	5367835	5534874	5241809	4854919	4710007	0.72423	0.00181146	0.0151446
Q16822	PCK2	1521477	1467135	1404392	1241469	1230303	1226502	975294	1063545	1141235	0.723895	0.000467297	0.00897777
O60232	SSSCA1	48066	41469	47681	35207	37055	37573	32836	34716	31651	0.72297	0.00177067	0.014968
O95817	BAG3	480301	419653	448840	380631	376913	346001	300155	323129	349695	0.72137	0.00246754	0.0171482
P19022	CDH2	1774279	1717485	1826495	1496023	1241646	1287243	1467070	1264411	1100167	0.72047	0.00824874	0.0339116
P55209	NAP1L1	4224315	4420370	4549578	3863700	3680344	3630193	3100053	3250010	3139794	0.719241	6.47e-05	0.00441264
Q7Z406	MYH14	457107	406387	392875	378210	356275	342868	296342	313391	293659	0.71905	0.00230232	0.0169198
P35749	MYH11	531181	474391	472507	447110	433268	424060	346069	358151	356751	0.717804	0.000531858	0.00944422
Q9NZH0	GPRC5B	12717	11289	10681	8682	8209	9669	8219	7174	9454	0.71632	0.0142711	0.0475371
Q96C19	EFHD2	133409	129890	141340	108160	110226	111923	91023	97238	100563	0.713782	0.000130934	0.00535562
P26038	MSN	2110868	1771072	1893124	1707390	1518597	1584674	1332645	1306346	1465492	0.710725	0.00443436	0.0231073
Q8NBJ5	COLGALT1	34267	32642	30538	24877	22286	23117	23523	21380	24265	0.709801	0.000522593	0.00944422
O75955	FLOT1	567545	530420	551253	428521	377605	412550	383462	407031	368422	0.702706	0.000171491	0.00609674
O43633	CHMP2A	333875	307381	328698	263385	242251	251459	216349	228601	231366	0.697266	0.000100011	0.0051327
P11137	MAP2	16039737	14497176	15963084	13848312	15041966	12678499	11616530	10488288	10274460	0.696329	0.00246115	0.0171482
Q15654	TRIP6	69607	57184	57664	47035	51328	47327	37793	43870	46101	0.692657	0.00907754	0.0358738
Q9BRX8	FAM213A	1335949	1225010	1380958	1148772	1169180	1136916	877305	904122	946577	0.69205	0.000215108	0.00675748
A6NMY6	ANXA2P2	3378554	2653696	2898714	2215563	2162117	2326105	1964526	1934040	2242179	0.687579	0.00701125	0.0305158
P40121	CAPG	103264	101512	105414	82765	84651	87049	66593	74065	72323	0.686615	2.45e-05	0.00300639
P17931	LGALS3	468363	376950	390072	365216	361631	373274	261763	280476	304423	0.685343	0.00627599	0.0282571
P16949	STMN1	5164194	6053245	5128950	4292798	4110032	4103164	4090932	3943824	3161887	0.684961	0.00613938	0.0279357
Q93045	STMN2	2178692	2602078	2078997	1798715	1618366	1605256	1708568	1666598	1315978	0.683863	0.012044	0.0430192
P35579	MYH9	13333720	12496087	12657926	9672369	9706659	9239322	8446025	8996408	8714932	0.679629	1.29e-05	0.00272896
P51178	PLCD1	681339	666855	749821	647803	584341	574692	485923	491820	442326	0.676863	0.000992733	0.0124019
P52788	SMS	3865403	4025911	4492293	3408414	3272144	3435343	2928384	2871516	2522296	0.672033	0.00115862	0.0128495
P60660	MYL6	7530955	6093949	6726738	5467877	4998985	5185426	4279475	4520701	4795943	0.66806	0.00264183	0.0175746
Q27J81	INF2	67354	54602	58739	54075	57156	50182	37034	37060	46604	0.667965	0.00975661	0.0376702
Q9H910	HN1L	94543	94789	100862	76587	64504	68293	65074	66089	62629	0.667802	0.000187268	0.00636042
Q13522	PPP1R1A	125093	135581	138178	99040	95339	92701	88022	86634	91412	0.667085	4.83e-05	0.00417575
Q99848	EBNA1BP2	53980	46551	45074	52743	49659	49719	56933	66230	61157	1.26589	0.0154909	0.0499385
P13010	XRCC5	22378170	22666049	21808397	23397628	23767075	23143170	23074631	23279900	22813406	1.03463	0.0155404	0.0500496
Q5JTH9	RRP12	53914	61312	60422	59852	60952	64092	68610	72138	81942	1.26782	0.0155517	0.0500496
Q96A65	EXOC4	39468	38769	40644	38410	34526	33306	34449	34421	33251	0.859019	0.015604	0.0501754
Q15029	EFTUD2	1325005	1240184	1318650	1338935	1320392	1310447	1377918	1405970	1399694	1.07718	0.0157669	0.0506565
Q15700-3	DLG2	191556	190311	199849	231735	270488	285041	268609	266088	339362	1.50255	0.0157899	0.0506636
Q5U5X0	LYRM7	70083	81367	69073	86139	94803	88440	84293	91361	92623	1.21655	0.0157958	0.0506636
O14964	HGS	386985	374571	370710	391762	382321	370712	397077	411506	412252	1.07822	0.0158189	0.0506952
Q9UQB3	CTNND2	51299	49192	44999	44221	41297	39945	41715	42097	39950	0.850656	0.0159519	0.0510784
Q5TZA2	CROCC	12041	12415	9535	14944	15700	15220	16059	22013	25319	1.86493	0.016082	0.0514517
Q99996	AKAP9	399342	382703	397965	374601	347672	362324	369831	352027	347803	0.906485	0.0161143	0.0514706
Q9Y265	RUVBL1	2229260	2266967	2228000	2409719	2281060	2327033	2368371	2463896	2533617	1.09542	0.016115	0.0514706
P14324	FDPS	138219	148369	149100	128432	125247	134999	132991	120688	118643	0.854561	0.0161317	0.0514806
Q674X7-2	KAZN	19766	18201	20236	22175	22900	21311	21804	24942	23424	1.20561	0.0162519	0.0518151
Q96EV2	RBM33	29947	30958	29522	33308	30245	28025	34391	35272	36680	1.17601	0.0162782	0.0518151
O43854	EDIL3	42749	67662	45376	60228	63680	62869	81414	82827	75685	1.54009	0.0162841	0.0518151
Q9C0C9	UBE2O	207257	199860	194847	188643	172688	181685	185710	182365	175537	0.903064	0.0163034	0.0518151
P22570-3	FDXR	635182	559899	571054	513290	434811	460050	472645	485398	393785	0.765416	0.0163054	0.0518151
P35251	RFC1	40911	41487	36232	44159	42913	41616	44602	48770	48368	1.19481	0.0163182	0.0518151
Q9NYF8	BCLAF1	808883	657198	692577	789503	801650	758093	853020	944360	915391	1.25669	0.0163345	0.0518235
Q9UII2	ATPIF1	58335	62925	54593	66894	87654	76627	81486	79993	94887	1.45784	0.0163986	0.0519834
Q6DKI1	RPL7L1	63717	57285	46090	59418	59763	57279	73592	70811	73804	1.30591	0.0164395	0.0520699
P01889	HLA-B	65838	77519	73534	79930	88252	77536	86742	103837	96185	1.32216	0.0164616	0.0520966
P54727	RAD23B	461234	489535	469693	562019	510416	539359	501100	498392	521683	1.0709	0.0164798	0.0521106
Q9H3M7	TXNIP	51734	45445	40488	58601	54871	60951	55469	55745	59766	1.24198	0.0165284	0.0521729
Q00688	FKBP3	3359876	3281309	3314066	3131857	2819189	2952532	3085142	3015077	2855276	0.899575	0.0165493	0.0521729
O95793	STAU1	190842	188824	202635	179683	158520	165433	169750	177222	164201	0.87785	0.016554	0.0521729
Q96G23	CERS2	109627	89563	105845	113469	118806	111856	121755	130442	141554	1.29084	0.0165543	0.0521729
P35232	PHB	11972576	13123246	11877432	12089754	13237051	12124349	13835953	14911809	14109784	1.15915	0.0166068	0.0522794
Q96KP4	CNDP2	6698462	6489734	6974436	6375411	6290462	6436756	5849073	5856366	6303926	0.893205	0.0166156	0.0522794
O75828	CBR3	134928	125823	132535	146036	151506	159881	148594	150392	167750	1.18676	0.0166544	0.0523582
Q9BVC6	TMEM109	40895	43738	42114	45855	44686	44438	47552	48814	54830	1.1929	0.0167422	0.0525906
Q8WUB8	PHF10	57707	51692	52042	59558	54953	55048	65968	68417	60480	1.20704	0.0167628	0.052612
O75391	SPAG7	132153	131110	116117	135580	129539	129863	142117	152287	146655	1.16258	0.0167927	0.052627
Q9UQL6	HDAC5	77145	72571	70767	78386	86059	79846	82432	83695	86765	1.14699	0.0168336	0.052627
P16070	CD44	35330	36553	45900	31873	27251	23118	22237	28182	23406	0.626788	0.0168343	0.052627
O75976	CPD	220451	198748	212888	216486	221487	206854	233461	235239	237620	1.11744	0.0168408	0.052627
P22087	FBL	152502	124093	125648	131610	152060	147381	162784	186626	182369	1.32203	0.0168495	0.052627
Q9Y3D3	MRPS16	12014	11666	11586	13080	11116	12550	13325	15343	15763	1.25988	0.0168642	0.052627
P00488	F13A1	176005	174434	171989	114542	109595	146000	134991	157255	167746	0.880489	0.0168644	0.052627
Q96IV0	NGLY1	19301	16085	20097	22809	19583	22749	23374	26915	24806	1.35348	0.0169848	0.0529591
Q01081	U2AF1	193483	182457	192226	210344	182611	213607	229936	218511	234804	1.20256	0.0170327	0.0530293
Q96FC7	PHYHIPL	80578	83260	93499	75080	78771	74364	74375	65742	65572	0.799298	0.0170352	0.0530293
Q9NVT9	ARMC1	174942	191642	169480	195635	187903	182192	202458	204856	208620	1.14899	0.0170852	0.0531044
Q6IBS0	TWF2	492699	496183	500510	522420	491905	502356	480179	454699	441833	0.924344	0.0170872	0.0531044
P31153	MAT2A	567603	554835	599675	512046	455397	513157	514504	532895	511999	0.905514	0.0171054	0.0531176
Q9NYV4	CDK12	9430	7595	9034	7524	9575	8299	10863	11020	11048	1.26371	0.0171378	0.0531748
Q8IXB1	DNAJC10	286115	240543	223444	283457	287310	302180	307554	328953	352728	1.3188	0.0171847	0.0532769
P02786	TFRC	130945	160698	156508	106792	103583	99742	133113	128569	101586	0.810593	0.0172056	0.0532982
P27694	RPA1	266369	250293	250728	300891	283818	296086	276934	304952	317558	1.17208	0.017287	0.0534404
P67775	PPP2CA	760970	811474	839105	881965	818777	903006	983889	913622	924964	1.1704	0.0172901	0.0534404
Q9NR56	MBNL1	101606	96546	86589	100842	110670	106731	110611	123075	115829	1.22748	0.0172995	0.0534404
Q9UG63	ABCF2	118784	119944	122087	113359	111290	105551	104360	104731	113717	0.894663	0.0173196	0.0534404
P48634	PRRC2A	577559	509585	528080	459570	462063	448394	493093	536724	540552	0.97223	0.0173218	0.0534404
P12955	PEPD	465018	416996	451086	450829	454629	487230	496820	517711	546292	1.17082	0.0174381	0.0537558
Q8N111	CEND1	22418	21101	21699	25476	36244	33086	31319	35380	41232	1.65493	0.0174689	0.0538069
P05129	PRKCG	190650	156864	165867	209462	214308	222292	194839	212884	229060	1.24037	0.0174914	0.0538329
Q9UN37	VPS4A	361145	340689	353575	369783	377986	387499	379148	375089	395452	1.08933	0.0175352	0.053924
P27824	CANX	7553901	7202614	7870922	7046190	6532418	6735792	6552979	6951826	6485373	0.883449	0.0175751	0.053974
Q8WYP5	AHCTF1	28827	27611	24828	23926	28070	25888	32577	42788	34909	1.35695	0.0175799	0.053974
P61966	AP1S1	459730	443331	489232	401063	385546	369523	446757	404226	389261	0.890792	0.0176111	0.0540161
O15427	SLC16A3	121666	128805	97183	141114	152599	135509	108043	108872	108336	0.935559	0.017627	0.0540161
Q6PEY2	TUBA3E	70028992	71385438	75716238	78706863	81207359	84234091	79124742	75761489	80419447	1.08371	0.0176503	0.0540161
Q9HCN8	SDF2L1	27578	26196	26043	22879	21769	21471	20138	23403	24519	0.852701	0.0176635	0.0540161
P35580	MYH10	28905782	23274706	21360192	21811094	21992706	19980646	16131348	17131108	16420205	0.675581	0.0176646	0.0540161
Q01433	AMPD2	218331	207612	188973	213421	197709	200476	233259	233210	232969	1.13745	0.0176878	0.0540437
O00499	BIN1	1195494	1216454	1190649	1297297	1455264	1364268	1337449	1311686	1415941	1.12837	0.0177204	0.0540898
Q13217	DNAJC3	79093	80332	91212	81705	77117	81919	93679	99145	92490	1.13836	0.0177313	0.0540898
P78344	EIF4G2	687738	679959	701664	736231	759287	707992	734494	762497	779878	1.10028	0.0178316	0.054352
Q9UHB6	LIMA1	780484	722563	708129	632670	686765	610663	586442	654618	613593	0.838763	0.0179913	0.0547948
Q9Y5K6	CD2AP	493603	427374	384802	504253	546124	542849	533110	594189	640471	1.3538	0.0180346	0.054883
P17174	GOT1	2731469	3045480	2679234	2962140	3105406	3254454	3309856	3305124	3266258	1.16852	0.0180991	0.0550353
Q96TA1	FAM129B	59719	47808	56006	42311	46645	43556	37408	39503	44717	0.743752	0.0182271	0.0553346
Q9HD42	CHMP1A	183946	173725	168687	166456	144848	149025	153913	148863	147671	0.855781	0.0182277	0.0553346
P41250	GARS	1233483	1277257	1377471	1219559	1201482	1295199	1150864	1109833	1097997	0.863815	0.0182412	0.0553346
Q96IX5	USMG5	33102	38179	34397	36568	41886	45573	44355	45777	49470	1.32101	0.0183379	0.0555701
Q13596	SNX1	871932	809565	802154	908128	981080	963513	899636	966153	1003195	1.15515	0.0183539	0.0555701
P17612	PRKACA	379950	367249	372097	435369	424096	421199	453658	400751	407278	1.12721	0.0183627	0.0555701
P40939	HADHA	5954977	4872768	5305409	6618313	7008383	6307326	6373930	7131375	7614295	1.30908	0.0183811	0.0555816
O95602	POLR1A	8364	9589	9878	10473	10927	8931	11531	12231	11795	1.2776	0.0185615	0.0560826
Q9NVX2	NLE1	319559	299200	288622	319177	298333	305619	355330	375277	330571	1.1695	0.0186215	0.0561754
Q53H82	LACTB2	33515	31956	36401	29741	24261	28322	28970	27921	28151	0.834793	0.0186218	0.0561754
P54920	NAPA	159991	177972	167878	159569	145948	155784	149059	138761	146056	0.857732	0.018656	0.0562341
O95870	ABHD16A	21204	21009	24260	25542	27657	24551	28608	26148	30662	1.285	0.0187419	0.0564482
Q96QE2	SLC2A13	38913	34792	31552	42251	50468	41247	46858	49812	58476	1.47397	0.0187824	0.0565255
Q9H479	FN3K	99675	88451	95089	109116	117702	117667	98664	101156	112821	1.1039	0.0188235	0.0566044
Q04917	YWHAH	3431977	3537362	3329413	3699950	3694091	3600884	3328219	3200929	3467512	0.970667	0.0188484	0.0566345
Q9NRX4	PHPT1	2883988	2689466	3275742	2653068	2173297	2562728	2345430	1950011	1885664	0.698493	0.0189227	0.0567637
Q9HCM4	EPB41L5	33889	32619	39887	30515	22865	27722	26509	24510	20568	0.672842	0.0189239	0.0567637
Q9Y673	ALG5	52706	47058	56727	55832	57926	63924	64033	64538	70936	1.27488	0.0189361	0.0567637
Q06546	GABPA	73663	76027	69380	74295	83520	84233	87181	88656	83406	1.18338	0.0191071	0.0572069
Q8TDQ7	GNPDA2	18607	17897	17942	20448	23736	25242	21676	23200	25383	1.29043	0.0191417	0.0572069
Q6UN15-3	FIP1L1	207420	192304	185700	206411	207338	194293	217321	220427	224586	1.13137	0.0191536	0.0572069
P04844	RPN2	1213724	1100395	1204435	1141959	1207498	1232037	1327478	1291276	1392344	1.13998	0.0191562	0.0572069
Q7L311	ARMCX2	7143	6002	6445	9982	11431	8533	8630	11342	11613	1.6123	0.0191592	0.0572069
Q15717	ELAVL1	500301	462707	421048	507757	498980	504730	538336	579302	534933	1.19401	0.0192404	0.0574042
P60709	ACTB	84849691	82697371	92372993	81440474	73614462	76358551	77011306	68818333	68769584	0.825635	0.0192667	0.0574295
Q9BYD2	MRPL9	24224	26134	23121	27756	24344	27647	28679	30682	29322	1.20692	0.019279	0.0574295
P08621	SNRNP70	391247	343442	351665	370284	366643	386977	416707	416806	466345	1.19653	0.0193807	0.0576843
A0MZ66	KIAA1598	304465	319682	303521	339215	364135	331142	301823	318715	310996	1.00417	0.0193949	0.0576843
Q9NY65	TUBA8	25162383	26558365	28082364	30072969	29451785	31988902	29980143	28667178	30330423	1.11497	0.0194174	0.057706
Q9NZL9-2	MAT2B	276026	267353	283245	290256	270190	282981	312840	293247	316030	1.11552	0.0194532	0.0577445
P49418-2	AMPH	568878	626841	534299	680177	753849	682651	674444	707442	781428	1.25046	0.0194607	0.0577445
Q9NVE7	PANK4	295616	273456	283999	325099	309616	348061	327061	316428	346566	1.16058	0.0195838	0.0580646
Q14444	CAPRIN1	1216480	1287237	1294265	1134500	1156583	1099695	1145430	1196942	1075699	0.89997	0.0196024	0.0580745
Q5T4S7	UBR4	171595	172279	162136	172312	171604	167122	181613	198408	183476	1.11361	0.0196267	0.0581012
P50402	EMD	264779	246098	245534	232142	229945	220611	241372	237999	234659	0.943971	0.0196749	0.0581638
O95834-2	EML2	44805	46642	47204	49499	56461	60356	58291	60756	71895	1.37714	0.0196784	0.0581638
Q16401	PSMD5	309971	297758	300400	303197	272074	294488	335294	329604	316234	1.08039	0.0197051	0.0581974
P61163	ACTR1A	1266811	1236982	1179865	1277122	1226886	1241808	1407073	1316896	1332721	1.10127	0.0197833	0.0583829
P06396	GSN	17812463	13789913	14835281	14842597	13327499	13796975	10660896	10666057	11965391	0.716926	0.0198019	0.0583925
Q9NY47	CACNA2D2	90185	85750	77065	74923	75822	82438	69626	70463	67867	0.82196	0.0198891	0.0586042
Q9NPL8	TIMMDC1	7345	8160	6294	8715	9436	7728	9984	10040	9323	1.34625	0.0199168	0.0586406
Q9UKN8	GTF3C4	11658	11661	11863	12756	12026	13793	13825	14984	13349	1.19828	0.0199454	0.0586792
P42574	CASP3	9128	8862	9413	7749	6557	7035	8685	6978	7499	0.845236	0.0199837	0.0587465
Q9H0E2	TOLLIP	918832	774290	898501	972626	1014211	1018021	1024703	1095657	1234319	1.29443	0.0200093	0.0587762
Q8TBP5	FAM174A	8858	7529	9031	8195	9435	7858	10854	12120	10100	1.3012	0.0200457	0.0587928
Q66PJ3	ARL6IP4	46869	31632	31209	51263	56499	49248	52627	77095	70021	1.82065	0.0200458	0.0587928
O95298	NDUFC2	103391	108632	102009	118197	162275	130759	139887	164826	155159	1.46441	0.0200767	0.0588287
Q96HD1	CRELD1	133664	129106	144201	152568	151985	165347	163812	158134	185042	1.24576	0.020089	0.0588287
P20674	COX5A	2309623	2715417	1946569	2359964	2906058	2589225	3034035	3362930	3559512	1.42815	0.0202487	0.05923
P42262-2	GRIA2	97999	91647	74305	117176	125876	114426	104963	116628	129964	1.33189	0.020258	0.05923
Q9UBB4	ATXN10	524763	544020	565369	566688	491710	511286	480585	448205	442179	0.838948	0.0202727	0.05923
O60828	PQBP1	82965	78888	75009	79291	76432	76959	83882	88881	85952	1.09226	0.020321	0.0593253
Q14498	RBM39	1416196	1383318	1386139	1509118	1430199	1416301	1490343	1593047	1522593	1.10042	0.0203511	0.0593677
Q8IWE2	FAM114A1	275612	202776	225857	194853	181901	187904	165197	161187	167555	0.701374	0.0204835	0.0596875
Q6NYC1	JMJD6	50209	49789	55328	55411	59364	63353	59440	61394	63307	1.18551	0.0204921	0.0596875
P19367	HK1	2178976	2134711	2036003	2403302	2932883	2656394	2471726	2677583	2869920	1.26293	0.0206181	0.0600085
Q7Z4S6-5	KIF21A	891617	840600	905435	842982	860443	841127	774710	775018	827364	0.901215	0.02068	0.0601428
Q9UPW5	AGTPBP1	48880	52041	54989	43910	49008	51808	39960	39171	44549	0.793278	0.0207207	0.0602151
Q15287	RNPS1	616603	564658	528134	663759	641773	597060	719865	824670	681412	1.30218	0.0208846	0.060645
Q8IYK8	REM2	12923	14635	13592	12192	10356	11591	11776	9112	8964	0.725443	0.0209294	0.0607289
Q9UPQ0-6	LIMCH1	586928	429265	305767	690830	730718	632523	649168	724059	750072	1.60617	0.0210078	0.0609097
Q6H8Q1	ABLIM2	41437	38527	34217	42028	47058	42365	45188	47657	48609	1.23886	0.0210826	0.0610526
P07195	LDHB	12169398	12719063	12390897	11613480	10447907	11729969	12584779	12811747	12447044	1.01513	0.0210892	0.0610526
Q9Y512	SAMM50	448368	502350	472671	546849	529306	529864	557913	573767	513980	1.15616	0.021119	0.0610728
Q14204	DYNC1H1	31747381	29399706	32971268	30798756	29788940	30118252	28659288	26960967	26725347	0.874915	0.0211282	0.0610728
Q8IZQ5	SELH	353947	346418	339695	375557	381468	370430	387939	421474	374387	1.1382	0.0211855	0.0611917
Q6P587	FAHD1	400550	452153	451757	449264	454171	495623	523479	497155	513850	1.17634	0.0212487	0.0613279
O75410	TACC1	44245	46802	41523	39028	37148	43629	47790	47478	51705	1.10864	0.0213356	0.0615318
P57772	EEFSEC	12437	11054	10614	13779	12477	12046	14169	13407	14643	1.23791	0.0213635	0.0615423
Q9UBS8	RNF14	36535	28489	19626	40349	37899	40981	42586	43689	48752	1.59512	0.0213716	0.0615423
P30793	GCH1	45478	40980	37254	51796	55501	60255	47148	55911	59104	1.31081	0.0214216	0.0616398
Q96JB2	COG3	19685	17549	18248	15268	14417	16556	17845	18764	17057	0.967269	0.0214709	0.0617348
Q9Y2X7	GIT1	533391	522270	512968	563127	625795	528780	607015	634503	617902	1.18538	0.0215221	0.0618017
Q04323	UBXN1	171793	152784	160112	151746	138230	132445	133761	137811	139992	0.84913	0.0215266	0.0618017
Q14165	MLEC	162669	158823	165680	140879	98537	124074	136025	134090	119719	0.800198	0.0215696	0.0618785
Q86W92	PPFIBP1	57910	60618	51270	49061	47269	49413	48205	45692	49249	0.843037	0.0216238	0.0619435
Q9NPI6	DCP1A	138530	131808	142171	140695	144726	155929	153909	156604	166669	1.15678	0.0216393	0.0619435
Q8WU90	ZC3H15	48379	48606	56712	45109	42677	44226	43485	42063	38779	0.80891	0.0216411	0.0619435
Q5JRA6	MIA3	174909	164751	160195	186233	185314	166202	186485	200600	201633	1.17778	0.0216775	0.0619817
P23368	ME2	901770	916258	959234	953366	1019324	988012	997676	1065671	1105275	1.14092	0.0216967	0.0619817
Q2TAY7	SMU1	211799	202382	199149	199410	190530	196379	210833	208613	216110	1.03624	0.0217034	0.0619817
Q96RF0	SNX18	25307	23721	22446	26599	26890	26902	27469	27180	31011	1.19848	0.021734	0.0620226
Q8IZH2	XRN1	29515	27144	24047	29571	29773	27177	31204	34719	35210	1.2531	0.0220167	0.0626772
Q9H270	VPS11	40549	39656	41104	42978	46150	44660	49131	44308	52362	1.2019	0.0220445	0.0626772
P11047	LAMC1	84120	82197	89741	93456	109187	97808	98647	108519	114560	1.25646	0.0220675	0.0626772
Q7Z7F0	KIAA0907	4233	4563	4362	4669	4337	4243	3045	3838	3795	0.811522	0.0220802	0.0626772
P14859	POU2F1	45320	45409	47841	42738	39910	43349	42589	37797	36775	0.8455	0.0220881	0.0626772
Q96S19	C16orf13	71720	65612	71480	57552	52424	59377	52696	53780	64199	0.817362	0.0221004	0.0626772
Q12905	ILF2	1274238	1277368	1237369	1336618	1305735	1347730	1353025	1299261	1347276	1.05558	0.0221065	0.0626772
P63261	ACTG1	84248083	82184958	91349258	81157408	73433553	76384429	77133534	68674710	68650732	0.831938	0.0221444	0.0626772
P43307	SSR1	118216	121380	125137	129248	139502	132068	132441	152611	147644	1.18634	0.0221495	0.0626772
Q7Z422	SZRD1	38132	40599	40840	35630	30949	33174	38192	36766	33767	0.909292	0.02219	0.0626772
Q96P64	AGAP4	99254	87528	101928	92219	84099	84552	106977	100605	106363	1.08741	0.0222021	0.0626772
A6NIR3	AGAP5	99254	87528	101928	92219	84099	84552	106977	100605	106363	1.08741	0.0222021	0.0626772
Q5VW22	AGAP6	99254	87528	101928	92219	84099	84552	106977	100605	106363	1.08741	0.0222021	0.0626772
Q5SRD3	AGAP8	99254	87528	101928	92219	84099	84552	106977	100605	106363	1.08741	0.0222021	0.0626772
Q13428	TCOF1	311306	259640	278482	310313	323904	295610	328338	355362	347006	1.21341	0.0222105	0.0626772
Q9Y5A9	YTHDF2	56088	51823	56083	53227	51472	52499	48913	49420	50516	0.907649	0.0222433	0.0627231
P22102	GART	632837	668445	661122	664821	633901	660441	713453	717519	682099	1.07678	0.0222741	0.0627634
Q969P0	IGSF8	75628	87367	70839	78460	91225	92373	96018	100799	104501	1.2886	0.0223173	0.0628388
P63167	DYNLL1	284014	285414	301382	332631	320000	352908	323125	307322	340384	1.11486	0.0225395	0.06336
P50416	CPT1A	48935	61607	58475	56942	60772	53506	67685	70728	68466	1.22401	0.0225447	0.06336
Q5MIZ7	SMEK2	2894	2580	2737	2875	2473	2403	3711	2987	3593	1.25332	0.0225524	0.06336
Q96T83	SLC9A7	160258	164025	141656	172990	164378	159971	191318	174722	188824	1.19085	0.0226263	0.0635206
Q9NZZ3	CHMP5	915451	835875	846055	930305	1020549	962974	971206	972506	1042375	1.14965	0.0226445	0.0635249
Q8WTT2	NOC3L	571684	565260	497542	600475	636846	526580	643435	751568	711737	1.28893	0.0226654	0.0635365
Q99470	SDF2	473701	423240	476507	463597	417696	428473	538638	525560	489788	1.13145	0.0227282	0.0636658
Q13617	CUL2	20464	20911	22475	25813	23998	24178	27476	24129	24384	1.19012	0.0227812	0.0637672
Q96AC1	FERMT2	952262	861320	786340	908322	910786	835070	1001084	1115453	1035172	1.21223	0.0228001	0.0637732
Q07866-10	KLC1	1238566	1230522	1256232	1269842	1113343	1116444	1111807	1015311	973058	0.832191	0.0228546	0.0638786
P17252	PRKCA	665322	526557	567531	703382	684897	696522	688871	732024	759595	1.23933	0.0228977	0.0639521
Q9Y5B6	PAXBP1	15329	15375	16244	15467	14821	15548	16826	16459	16313	1.05645	0.0229544	0.0640636
P19105	MYL12A	1645276	1410388	1459923	1375165	1531919	1555423	1209114	1281693	1226905	0.823306	0.023	0.0640966
O14950	MYL12B	1645276	1410388	1459923	1375165	1531919	1555423	1209114	1281693	1226905	0.823306	0.023	0.0640966
Q13188	STK3	20360	19176	21590	23165	21311	22293	22947	23973	23024	1.14426	0.0230296	0.0641322
Q13724	MOGS	611462	594607	671403	664763	622629	666422	744947	692877	727030	1.15307	0.0231602	0.0644488
P49591	SARS	1749458	1833098	1927267	1784578	1565311	1822486	1596681	1480841	1406644	0.813849	0.0232265	0.064586
Q9NPA8	ENY2	1033142	1006777	1083951	1178457	1019646	1084959	1240158	1190091	1193519	1.16003	0.0233032	0.0647518
P53701	HCCS	50574	41070	35567	51422	38511	44896	67543	66574	54704	1.48431	0.0233246	0.064764
P28070	PSMB4	790994	816986	849871	897218	956292	999972	895536	932042	1004489	1.15225	0.0233601	0.0648153
Q8IVS2	MCAT	138368	134129	140493	143847	164137	145928	155138	162631	168850	1.17828	0.023538	0.0652615
Q9Y570	PPME1	324290	338216	353166	372824	420765	381756	371718	372516	383736	1.11057	0.0237146	0.0656668
P05937	CALB1	419006	444906	523205	396844	350478	412518	358853	324707	350626	0.745565	0.0237317	0.0656668
Q9Y605	MRFAP1	156393	165730	163999	152920	129787	137656	132424	145527	128180	0.835451	0.023736	0.0656668
Q9BXR0	QTRT1	74327	71004	67327	72372	63081	69702	77868	79012	85521	1.13986	0.0237549	0.0656711
O94979	SEC31A	378684	345259	383809	440783	388846	421321	475359	420311	446894	1.21197	0.0237845	0.0657052
P62714	PPP2CB	552150	559814	574979	595237	549980	590440	648983	608680	613665	1.1093	0.0240879	0.066451
Q9Y4L1	HYOU1	7399194	6789182	7448562	7570819	8097936	7692304	7880163	8190575	8260064	1.1245	0.0240894	0.066451
Q9Y305	ACOT9	62810	52178	62381	72448	80293	83343	73217	85343	98903	1.45157	0.024114	0.0664708
Q9H305	CDIP1	26572	25084	24622	29306	33182	28021	29424	31339	29897	1.18855	0.0241777	0.0665835
P30520	ADSS	851363	843217	869028	772781	797260	814904	748698	813134	793996	0.91895	0.0241899	0.0665835
P60983	GMFB	596157	584081	618671	558458	487467	529167	544385	514248	476190	0.853197	0.0242527	0.0666786
Q12769	NUP160	28762	29941	29355	32809	31070	34063	33423	32882	37297	1.17652	0.0242595	0.0666786
P18084	ITGB5	14962	12440	13339	15316	17087	18383	18920	16510	20574	1.37463	0.0243076	0.0667627
Q9BT22	ALG1	68161	57327	59724	64908	67361	70546	70716	77712	80538	1.23624	0.0243508	0.0668059
Q9BTE1	DCTN5	586870	580703	593032	545285	487112	529258	563756	531213	521036	0.917869	0.0243585	0.0668059
Q13480	GAB1	56150	47062	42926	40780	37644	35237	32604	38107	35650	0.727812	0.0244237	0.0669094
Q99829	CPNE1	1207463	1091827	1151548	1152914	1118703	1137199	1242425	1240451	1346303	1.10964	0.0244314	0.0669094
Q9H299	SH3BGRL3	396770	369919	446241	309306	341043	316243	311495	337726	360004	0.832055	0.0245442	0.0671575
Q8TEM1	NUP210	174392	199947	179430	214690	219249	214994	198311	224998	218881	1.15967	0.0245573	0.0671575
Q13136	PPFIA1	47335	46477	43930	48748	53786	48481	53380	55778	51101	1.16347	0.0246782	0.0674396
Q96MM6	HSPA12B	1244671	1358734	1485197	1302839	1333725	1356931	1605342	1959408	1597890	1.26269	0.0248425	0.0678398
P35914	HMGCL	121180	116282	114328	144697	173698	144313	145342	149968	178949	1.34813	0.0248763	0.0678835
Q9Y2D0	CA5B	91592	78963	79465	106558	112076	106095	105568	101965	130944	1.3538	0.0249238	0.0679643
Q08722	CD47	187426	231407	188919	227946	246451	235898	244913	260832	248624	1.24124	0.0249781	0.0680637
Q08945	SSRP1	223739	274336	229031	297622	310351	294592	326193	347816	281832	1.31458	0.0250505	0.0682049
Q9UDY4	DNAJB4	8647	8988	9843	8643	9234	10387	11398	10873	10812	1.20398	0.0250659	0.0682049
Q8N766	EMC1	171804	179602	190661	198365	180380	201567	204316	210745	208767	1.15083	0.0251246	0.0683159
Q16134	ETFDH	11533	11542	8935	13023	12658	14270	13196	15234	16662	1.40868	0.0252055	0.068487
Q92917	GPKOW	30756	29154	28282	27482	31739	31583	33649	33919	34590	1.15836	0.0253001	0.068695
O14874	BCKDK	49464	52232	46129	53125	58398	59353	55969	63813	67173	1.2647	0.0253619	0.0688135
Q9H936	SLC25A22	22226	22192	23888	23122	28534	31145	28833	31983	34040	1.38869	0.0254844	0.0690966
Q96GQ5	C16orf58	45129	47764	47588	44506	45436	46746	50778	48789	48680	1.05528	0.0255497	0.0692225
Q9UNL2	SSR3	47967	47052	52524	50848	50081	56595	55675	59235	59759	1.18385	0.0255672	0.0692225
O75165	DNAJC13	43719	37722	41635	48726	50606	52398	44483	47059	52825	1.17299	0.0256754	0.069466
Q13409-2	DYNC1I2	2191871	2053333	2273862	2002731	1819579	1805757	1939866	1709655	1546974	0.797123	0.0257042	0.0694944
Q712K3	UBE2R2	59081	66572	64595	58718	54868	56260	57060	55538	51976	0.86505	0.0257459	0.0695579
P30519	HMOX2	1630802	1673286	1688790	1688199	1800388	1718184	1788860	1765948	1794266	1.07134	0.0258839	0.0698809
Q16775	HAGH	423498	409155	407826	414650	416586	462979	467900	479312	455807	1.13103	0.0260033	0.0701536
Q13148	TARDBP	1552014	1567256	1509534	1642151	1537339	1649495	1744930	1849890	1656666	1.13452	0.0260338	0.0701861
O43719	HTATSF1	122181	109240	117855	126361	110600	118159	135533	137524	129801	1.15341	0.0261705	0.0705047
P29762	CRABP1	3561222	3609386	4675162	3521286	2150631	2906519	2610036	2040372	1717646	0.53758	0.0263288	0.0708809
Q9BXS5	AP1M1	409807	384484	439886	460330	482539	512597	473672	451183	498806	1.15353	0.0264483	0.0711522
Q01469	FABP5	1682060	1769687	1755908	1527975	1384308	1662339	1533402	1455762	1456805	0.853737	0.0264927	0.0712215
Q96SK2	TMEM209	35697	32086	29669	36772	38865	37134	36604	41118	40548	1.21362	0.026561	0.0713545
Q00059	TFAM	1198352	1259999	1186117	1302499	1463832	1279524	1391888	1448838	1390220	1.16092	0.0266841	0.0716345
O14980	XPO1	1039612	1015106	1050458	1098843	1106219	1214201	1237388	1130743	1178908	1.1423	0.0267263	0.0716974
P13747	HLA-E	40397	44173	45941	48273	55619	47895	50522	56454	58516	1.26803	0.0267708	0.0717662
Q15366	PCBP2	1489783	1389735	1422743	1481272	1369284	1482631	1813782	1623695	1573660	1.16477	0.0268752	0.0719951
Q96I24	FUBP3	1048414	935845	970813	932312	904197	927945	1017713	1140695	1060870	1.08941	0.0269165	0.0720551
Q92747	ARPC1A	112615	102423	121800	100578	98500	112740	85638	86488	94838	0.792559	0.0269726	0.0721547
Q8N573	OXR1	152016	136982	145456	177627	197653	191203	165099	173036	209793	1.26119	0.027007	0.0721642
Q9Y2A7	NCKAP1	355159	351417	373921	407955	396894	412254	398360	388329	439859	1.13517	0.0270142	0.0721642
Q14C86	GAPVD1	190334	183329	196490	189905	183794	180013	198176	205631	198266	1.05598	0.0271331	0.0724312
Q9Y2X3	NOP58	186301	146962	156256	206788	198127	189439	194507	223786	241081	1.34698	0.0271633	0.0724607
Q9UBB6	NCDN	145534	149996	145594	140059	130554	136748	142541	147653	153257	1.00528	0.0272668	0.0724912
Q9UJV9	DDX41	89846	64531	76029	89596	88959	84122	95604	102739	106923	1.3249	0.0272726	0.0724912
P49585	PCYT1A	44935	41223	41214	45371	47676	47921	46881	49352	53710	1.17721	0.0272774	0.0724912
Q92734	TFG	105321	92754	103547	102968	100413	104768	91857	91270	88674	0.901131	0.0272908	0.0724912
Q9P2E9	RRBP1	800766	696443	717634	645765	659416	609135	608054	665848	617462	0.853949	0.0272918	0.0724912
Q9NP97	DYNLRB1	1096650	1069021	1112387	945367	948343	977587	1040771	975609	878215	0.883021	0.0272919	0.0724912
Q5JTZ9	AARS2	369662	382123	342988	378562	421343	378748	406600	458321	451051	1.20205	0.0273081	0.0724912
P06753	TPM3	6266899	6078982	5378735	5487924	5177178	4971150	4573232	5193971	4661737	0.814062	0.0273357	0.072514
P78362	SRPK2	621568	541808	593546	699101	713730	696622	647258	690189	776211	1.20305	0.0274299	0.072705
P18065	IGFBP2	43606	47331	39823	42225	36857	45080	36035	32331	27752	0.735072	0.0274759	0.072705
P20336	RAB3A	2069933	2359914	2056214	2342758	2529327	2390594	2462676	2493214	2601031	1.1651	0.0274776	0.072705
P12532	CKMT1A	2008047	2266887	2117088	2215386	2710230	2971081	2787995	2979805	3490915	1.44848	0.0274842	0.072705
P07197	NEFM	7056429	7367434	8645299	5969073	6167171	6336829	5418458	6544687	6229703	0.788622	0.0275075	0.0727161
O75061	DNAJC6	243346	262340	227853	264261	307106	285844	287343	286893	309888	1.20529	0.0275473	0.0727708
P60842	EIF4A1	7833200	8350726	8573534	7493907	7339976	7593173	7299215	7241746	7834014	0.903767	0.0275818	0.0728112
Q9NZB2	FAM120A	127194	111690	96408	133246	130690	119782	134761	154388	150961	1.31262	0.0277015	0.0730766
Q9H9T3	ELP3	46461	44442	49362	51329	50150	52537	49888	51037	51169	1.08433	0.0278331	0.073332
P05455	SSB	6172951	5758769	5881957	6839501	6405311	6394645	6206599	6392166	6207090	1.0557	0.0278368	0.073332
Q9NQ50	MRPL40	76508	76586	79938	90961	108240	99958	91915	105549	121144	1.36723	0.0279807	0.07366
Q5SNT2	TMEM201	19067	20236	16459	20733	21113	21471	21241	23765	24779	1.25148	0.0282801	0.0743966
O14617	AP3D1	365299	347122	368670	392721	415500	414949	371852	384578	413280	1.08197	0.0283932	0.0746426
O15126	SCAMP1	1421833	1390044	1161742	1507954	1565214	1360635	1664734	1603016	1644558	1.23623	0.0284302	0.0746545
Q16629	SRSF7	55279	45899	48484	50809	46964	50887	62046	65294	55271	1.22016	0.028437	0.0746545
Q15334	LLGL1	367119	313600	397721	328945	265692	300216	268367	248368	277652	0.736608	0.0284675	0.074683
Q9Y237	PIN4	21347	18932	20176	20375	19663	18600	21710	22121	22687	1.10029	0.0285259	0.0747847
Q92793	CREBBP	122875	125673	111017	128250	125800	124108	135775	149154	133820	1.1646	0.0286107	0.0749552
Q96RU3	FNBP1	70271	62836	60433	74985	75255	71429	71038	78785	78391	1.17916	0.0286808	0.0750872
Q10713	PMPCA	1800563	1706351	1758317	1908209	2021986	1808898	1911435	2091067	2148889	1.1683	0.0287107	0.0751138
Q01844	EWSR1	333743	305330	304566	291172	279684	274091	297480	293560	289641	0.933282	0.0287771	0.0752358
O00267	SUPT5H	141328	128821	133252	124927	120776	122526	136443	136259	129707	0.997541	0.028992	0.0757455
Q9BPZ3	PAIP2	51190	49386	56798	74121	74856	65223	65327	59277	77815	1.28623	0.0290399	0.0757984
Q9Y383	LUC7L2	467558	447883	438146	493448	471107	447636	523156	538833	486292	1.14384	0.0290813	0.0757984
P51003	PAPOLA	90012	90017	83466	80245	79063	82569	89314	99222	109398	1.1307	0.0290845	0.0757984
Q6GYQ0	RALGAPA1	4444	4122	4649	5051	4227	4459	5087	5676	5299	1.21544	0.0290919	0.0757984
O00425	IGF2BP3	655414	618203	726380	577615	378791	516297	521502	432399	388116	0.67101	0.029217	0.0760723
P31146	CORO1A	677229	639108	648553	748203	845990	800000	697402	704781	812428	1.12709	0.029539	0.0768579
Q9C005	DPY30	801023	847664	686296	771313	767547	817583	876314	954914	958066	1.19457	0.029655	0.0770907
Q16891-2	IMMT	5024150	4821663	4396063	5259228	6054422	5113899	5525645	6311346	6172593	1.26455	0.029669	0.0770907
P30043	BLVRB	149071	126510	146435	121028	123321	132471	112590	112070	121590	0.820467	0.0297546	0.0772603
Q9NWB6	ARGLU1	16021	15562	14634	18946	17110	15441	18432	18520	19426	1.21985	0.029921	0.0776395
Q99536	VAT1	1059731	976570	946775	1195717	1310187	1343664	1230869	1315251	1650297	1.40674	0.0299741	0.0777242
O00567	NOP56	248643	218079	222053	240676	251632	238710	254226	282515	268729	1.16942	0.0300229	0.0777978
Q9Y4P3	TBL2	142987	143840	155517	158321	142448	155557	175666	163992	165216	1.14136	0.0300911	0.0779117
P0CG34	TMSB15A	104670	123309	150769	103176	59408	87896	82329	64821	46237	0.510595	0.0301283	0.0779117
P0CG35	TMSB15B	104670	123309	150769	103176	59408	87896	82329	64821	46237	0.510595	0.0301283	0.0779117
Q9UHG2	PCSK1N	37906	40280	31207	32322	29546	28216	28883	27802	25986	0.755725	0.0301606	0.0779423
P49321	NASP	1803815	2055484	1818309	1657133	1538484	1624272	1607811	1727423	1503665	0.852278	0.0303547	0.0783859
Q5JSZ5	PRRC2B	369743	376201	368345	355386	358140	354458	372652	365575	386909	1.00973	0.0303873	0.0783859
Q9NVZ3	NECAP2	26539	24711	24516	28181	30214	29038	27475	33086	31465	1.21461	0.0303941	0.0783859
Q8TDJ6	DMXL2	103581	103927	101978	109344	113537	109807	112431	105241	112973	1.06837	0.0304917	0.0785843
Q9UGI8	TES	84346	66372	79832	65301	62521	66261	54916	55862	64564	0.760538	0.0305562	0.0786973
P19623	SRM	166415	162970	170415	167621	170803	171370	178193	173224	185480	1.07422	0.030678	0.0789575
P46939	UTRN	38056	31702	32155	32407	31200	31011	27850	27171	28241	0.816991	0.0307468	0.0790811
Q9Y5E7	PCDHB2	145440	142503	143952	153857	151935	157802	149138	159926	150568	1.06422	0.0308489	0.0792901
O75083	WDR1	1675522	1719396	1888473	1642754	1549179	1621556	1575601	1557278	1458027	0.868932	0.0309035	0.0793768
P40925	MDH1	13797265	14644647	12938440	14963236	14513944	13977971	15924429	15765225	15128447	1.13141	0.0309334	0.0793999
P08247	SYP	156489	198448	147023	180278	195575	210770	213535	223812	246311	1.36198	0.0310268	0.079586
P16050	ALOX15	516719	407162	243622	601814	817466	689965	589260	864506	739156	1.8783	0.031172	0.0799044
Q05209	PTPN12	63000	63657	78130	59612	55714	58568	51499	48608	56250	0.76351	0.0312116	0.0799521
P51114	FXR1	1469246	1227239	1435264	1426393	1371099	1457499	1563012	1618070	1752892	1.19416	0.0312954	0.0801128
P22059	OSBP	510263	499846	502364	577966	523858	522982	556488	578682	553014	1.11617	0.0313432	0.0801812
Q96JE9	MAP6	420523	401593	383210	433851	491928	478403	479219	497528	595550	1.30446	0.0313999	0.0802475
O60341	KDM1A	258884	249678	236543	242447	227243	234497	265908	253726	260337	1.04679	0.0314113	0.0802475
Q9BQE3	TUBA1C	70710138	72578712	77364954	79292177	80256991	82579703	77131009	74878932	78376187	1.04411	0.0314529	0.0802944
P10321	HLA-C	51956	56465	59915	62582	66455	59130	63296	71083	74971	1.24364	0.0314719	0.0802944
Q12882	DPYD	87618	73860	88846	75612	56258	69272	66039	59116	58370	0.73315	0.0315176	0.0803571
P84090	ERH	69002	66655	65367	73912	63128	69234	94518	86215	74257	1.26846	0.0315609	0.0804137
Q14141	SEPTIN6	324532	332664	304799	351969	338327	345239	326583	305338	308494	0.977567	0.0316052	0.0804727
O60610	DIAPH1	262626	245840	244307	268100	321667	306114	289009	318922	344465	1.26518	0.0316629	0.0805101
Q9UKX7	NUP50	163423	175604	156398	161307	162502	154443	175859	185895	176209	1.08586	0.031675	0.0805101
O96008	TOMM40	88177	97174	101058	71082	86084	81486	105902	91429	102867	1.04814	0.0316941	0.0805101
Q9UPN6	SCAF8	105784	99490	100416	104195	98206	104772	109627	111008	108427	1.07646	0.0317046	0.0805101
Q9UBU8	MORF4L1	120039	124062	125978	115749	109903	109710	123630	119053	113417	0.962227	0.0317616	0.0806011
Q9NRL3	STRN4	182341	175301	182681	171226	167528	167810	172597	168419	158584	0.924632	0.0318145	0.0806274
Q92614	MYO18A	1596677	1570659	1472490	1479924	1474542	1303776	1382824	1314949	1265770	0.854244	0.0318313	0.0806274
Q86X10	RALGAPB	72818	72804	71582	78803	72649	78807	79796	77140	80598	1.0936	0.0318355	0.0806274
P37108	SRP14	1016256	1012841	960731	909424	807445	832626	961002	979760	864895	0.938401	0.0320387	0.0810881
Q6PJT7	ZC3H14	37369	33205	35382	35486	32082	32449	39376	38844	37095	1.08833	0.0322129	0.0814746
Q92823	NRCAM	934481	899382	873943	946837	989221	940573	802214	819586	906375	0.933662	0.0324199	0.0819437
Q8WVV9	HNRNPLL	19888	24422	22226	24090	23870	24325	25771	25808	27421	1.18733	0.032505	0.0820575
Q8NCW5	APOA1BP	180617	190146	181777	198993	204446	226154	204984	210034	227084	1.16209	0.0325081	0.0820575
P12694	BCKDHA	456660	401795	406129	466178	544965	510886	487823	556311	606667	1.30541	0.0325923	0.0822157
Q9Y4E6	WDR7	81524	77872	79100	87615	95082	86092	85443	80475	86100	1.0567	0.0326511	0.0823092
Q9H1D9	POLR3F	45614	46693	40736	41826	38281	38788	44811	46095	46206	1.03058	0.0328095	0.0826539
P35659	DEK	537636	540086	540232	572395	536909	577705	594426	582288	569604	1.07934	0.0328439	0.0826858
Q9UN36	NDRG2	200210	209958	169179	235564	273166	236047	214952	233853	242861	1.19387	0.0329262	0.0828382
P68366	TUBA4A	56035889	57246216	61134981	62317223	63418451	65552954	62521580	60542289	63337807	1.06871	0.0330496	0.0830936
Q5JSH3	WDR44	619005	563650	588003	612075	661437	622591	559458	560003	579328	0.959411	0.0331774	0.0833383
P54886	ALDH18A1	455398	458243	487481	521173	535020	531655	483221	544565	549881	1.126	0.0331907	0.0833383
Q9Y371-2	SH3GLB1	613577	643302	609568	645787	637792	621773	663624	660315	654272	1.05988	0.03366	0.0844607
Q9BQS8	FYCO1	31793	38873	39478	38863	38000	40840	44983	47613	59353	1.37955	0.0336942	0.0844909
O43432	EIF4G3	198145	178413	188667	181790	166510	168264	167074	158400	170041	0.876669	0.0338961	0.0848652
P55884	EIF3B	183612	180511	185068	192256	191179	194915	178369	184744	189533	1.00629	0.0338989	0.0848652
P38919	EIF4A3	658035	646722	661895	637825	589602	584857	638458	639381	627612	0.968881	0.0339104	0.0848652
P52209	PGD	1260179	1187178	1341706	1405354	1386307	1598612	1467572	1460173	1559744	1.18433	0.0339695	0.084913
Q8IYB5	SMAP1	60792	70027	70221	78389	93773	83313	77213	74640	85449	1.18037	0.0339741	0.084913
O95373	IPO7	494884	480117	506806	469657	453179	440704	462160	477771	488156	0.963747	0.0340938	0.0851435
Q13098	GPS1	164230	155564	170785	187623	199952	190799	180442	173318	202701	1.13429	0.0341358	0.0851435
P27105	STOM	835369	694926	721548	843954	901059	908232	887762	1004325	1162140	1.35632	0.0341553	0.0851435
Q9BTX1	NDC1	92756	95987	84996	92339	89333	86793	100430	98179	109007	1.12376	0.0341559	0.0851435
Q9H7E9	C8orf33	29022	30063	27353	27013	27108	26328	28692	29070	29421	1.00862	0.0341903	0.0851734
Q7Z434	MAVS	61477	49730	45878	58330	60995	57408	62835	71305	70412	1.30217	0.0342206	0.0851932
P17900	GM2A	38553	28652	38630	36604	30952	29398	44210	42105	44320	1.23433	0.0342802	0.0852664
Q8IWS0	PHF6	116242	110636	107996	119445	114888	124416	125906	120111	131666	1.12784	0.0342948	0.0852664
Q15631	TSN	188764	177891	185887	200299	186621	204533	201714	200365	203932	1.09677	0.0343185	0.0852696
P23468	PTPRD	82295	90404	80086	100137	94299	97567	97533	87468	93921	1.1034	0.0344196	0.0854269
Q9NP61	ARFGAP3	318577	298574	353649	283565	257290	271089	291475	268934	251444	0.836272	0.0344268	0.0854269
P78371	CCT2	9392969	9685706	10036726	9220165	8961587	9247727	9151578	8746586	9190944	0.930405	0.034458	0.0854487
P46783	RPS10	1281052	1402869	1330527	1260322	1199392	1185058	1274757	1301628	1307486	0.967473	0.0345047	0.0854905
P57740	NUP107	20790	21995	21526	24254	25481	24255	22841	27554	26439	1.19473	0.0345298	0.0854905
P13798	APEH	1278483	1391117	1345647	1261802	1166387	1193740	1273809	1203750	1206781	0.917587	0.0345423	0.0854905
Q14847	LASP1	610621	628830	611353	610908	564701	545240	570203	554147	539257	0.898856	0.034645	0.0856889
O15254	ACOX3	184860	193897	192659	176343	143731	149932	190538	179177	169632	0.943878	0.0346928	0.0857513
P36542	ATP5C1	11513973	11458701	10100287	12628445	14510241	12953913	12643308	14211564	15602841	1.28376	0.0347185	0.0857585
Q15155	NOMO1	289088	318749	341665	265756	257849	287211	407102	339000	327224	1.13041	0.0347633	0.0857585
Q5JPE7	NOMO2	289088	318749	341665	265756	257849	287211	407102	339000	327224	1.13041	0.0347633	0.0857585
P05026	ATP1B1	2757918	3362055	2680699	3259567	3804640	3816851	3569239	3736273	4037134	1.28884	0.0349001	0.0860401
Q14258	TRIM25	454946	422500	404991	461180	466026	448750	474299	468149	505070	1.12872	0.0351723	0.0865488
Q96PE3	INPP4A	145748	136396	141317	145989	157899	148119	161126	150567	160394	1.11483	0.0351733	0.0865488
Q13347	EIF3I	1410118	1454414	1397507	1334995	1220630	1315653	1287328	1357357	1362204	0.940134	0.0351937	0.0865488
P29372	MPG	23025	24293	22461	21768	18910	22085	24484	24941	23554	1.04586	0.0352179	0.0865488
O60282	KIF5C	2638816	2614979	2756744	2763393	2563691	2525094	2510970	2322223	2271536	0.886923	0.0352202	0.0865488
Q9BUJ2	HNRNPUL1	1430129	1264066	1257115	1453767	1354332	1356830	1505572	1543206	1479259	1.14596	0.0353354	0.0867445
Q7Z2D5	LPPR4	49269	54671	40549	49061	57290	57654	61311	62997	73669	1.37019	0.0353454	0.0867445
P55769	NHP2L1	409736	399458	388277	443818	357897	408792	508008	512522	440671	1.22024	0.0354156	0.0868608
Q8WWM7	ATXN2L	287226	283464	270715	259783	254939	243642	263085	270513	245807	0.926314	0.035508	0.0869699
Q96KG9	SCYL1	80848	73368	76326	70639	74370	71306	78167	79221	80225	1.03067	0.035529	0.0869699
Q9BTW9	TBCD	161725	156515	184033	196503	186795	205115	193607	182780	192170	1.13197	0.0355499	0.0869699
Q9BTC0	DIDO1	24776	22041	21395	22850	22576	22197	25277	24954	25618	1.11196	0.0355661	0.0869699
P06746	POLB	140026	120649	127354	138220	142107	137761	148840	164784	145548	1.18334	0.0355846	0.0869699
Q7L0J3	SV2A	174360	201410	169268	207591	275254	245289	233833	220894	243576	1.2812	0.03562	0.0869699
P15923	TCF3	9326	7175	5939	10137	11038	9067	10135	11242	13011	1.53244	0.0356202	0.0869699
P18031	PTPN1	71583	74584	82224	83881	80138	85829	83597	91323	93708	1.17618	0.035776	0.0872943
P68363	TUBA1B	75867706	77850609	82657442	84580840	85306691	87770955	82843348	80386483	84106823	1.04637	0.0358114	0.0873246
Q8WVC6	DCAKD	60143	59529	58329	63729	63867	61585	62705	61141	65244	1.0623	0.0358433	0.0873466
Q9P2N5	RBM27	39505	33008	33742	41312	40222	34572	44412	42537	49666	1.28573	0.0359752	0.0876119
Q9UMS4	PRPF19	729901	737015	701081	763876	703261	696523	813146	812913	760302	1.10072	0.0360036	0.0876187
O43681	ASNA1	914134	885155	916590	915520	936966	940300	960358	971388	1056107	1.10014	0.0360241	0.0876187
Q13126	MTAP	73465	76064	80439	83105	81893	85354	81030	82752	86173	1.08691	0.0361135	0.08778
Q15067-2	ACOX1	1119457	1004221	1176736	1018510	935778	964874	959273	948151	949072	0.865496	0.0362626	0.0880861
Q8N5C8	TAB3	3718	4462	4679	6061	5178	4918	5931	5196	6232	1.34995	0.0364031	0.088363
Q01459	CTBS	52300	43697	48214	65668	48923	60337	62565	64368	63810	1.32267	0.0364437	0.088363
P29144	TPP2	503329	516364	480675	515797	480311	486694	532610	558235	529750	1.08013	0.0364463	0.088363
Q9NRV9	HEBP1	396138	382224	388316	389905	380580	387381	396938	401858	412677	1.0384	0.0365115	0.0884647
P53367	ARFIP1	29875	28897	30842	28155	30959	31320	34952	31814	34181	1.12646	0.0366482	0.0887395
Q71U36	TUBA1A	86330120	88532854	93395992	95705554	97092821	100411524	95705730	91265386	96098284	1.05521	0.0367017	0.0888126
Q6RW13	AGTRAP	7439	5710	7345	5824	5572	4884	4765	5199	5326	0.746072	0.0367906	0.0889712
Q00587	CDC42EP1	77141	74974	65897	83409	87360	75680	82953	93172	98629	1.26027	0.037066	0.08958
O95057	DIRAS1	17367	18017	15814	21877	22099	25221	19107	22303	25898	1.31466	0.0370962	0.0895961
P25098	ADRBK1	238247	224711	258301	260835	271937	248357	268926	294567	277258	1.16567	0.0371521	0.0896742
Q9NX63	CHCHD3	136528	142190	122729	164455	153196	135610	166488	189685	160178	1.28622	0.037183	0.0896918
A5YKK6	CNOT1	125611	116850	121083	121120	122139	125078	131713	126371	132043	1.07312	0.0372574	0.0898145
Q16643	DBN1	6444109	5358277	6190586	5413466	5185327	4774249	5184445	4899849	4648232	0.818793	0.0373694	0.0900274
Q9NQR4	NIT2	370467	385573	359212	398382	389136	409990	390916	422792	428582	1.11391	0.0374219	0.0900391
Q8NFU3	TSTD1	8174	7653	6584	7170	8571	9565	9360	10157	10396	1.33475	0.0374546	0.0900391
P82932	MRPS6	58420	50685	60929	60523	69106	70442	73515	71207	91943	1.39187	0.0374568	0.0900391
O43491	EPB41L2	1177053	1037097	925767	1191113	1199085	1083778	1245344	1284368	1393527	1.24947	0.037469	0.0900391
Q9UN86	G3BP2	1345837	1313347	1418332	1437173	1508705	1474504	1392313	1405759	1445440	1.04071	0.0375214	0.0901083
Q9BXY0	MAK16	78506	60182	60308	75821	73047	62910	80515	90427	95835	1.34061	0.0375641	0.0901538
Q8N7H5	PAF1	371571	349598	346481	379791	402416	370901	382980	412709	395558	1.11577	0.0377175	0.0904649
P42765	ACAA2	2946676	2986017	2607826	3215683	3686904	3157098	3241444	3738662	3728485	1.25386	0.0377489	0.0904833
O60315-2	ZEB2	2971	3186	3456	3629	3800	3854	4192	3612	4652	1.29575	0.0379657	0.0909455
Q9H0U3	MAGT1	64669	59988	60646	61246	59869	63806	67074	84148	72868	1.20932	0.0382641	0.0916028
Q14240	EIF4A2	1953719	1831252	1927797	2093006	1978218	2041775	2073924	2059576	2258628	1.11892	0.038424	0.0919275
P51688	SGSH	223478	159061	194429	246636	240259	232741	266300	261313	358259	1.53539	0.0386372	0.0923795
P23528	CFL1	37551905	37728175	39784793	35390686	32158311	33551387	35518709	32636218	28884185	0.843343	0.0387206	0.0924686
Q6P9B6	TLDC1	378204	404023	379520	371008	343507	374389	353327	343067	308473	0.864962	0.038742	0.0924686
Q2M2I8	AAK1	1136385	1059156	1181402	1013018	1030674	903115	882380	1005456	979629	0.84913	0.0387473	0.0924686
Q16864	ATP6V1F	35214	36533	31916	33449	32129	28886	39173	35398	40519	1.11023	0.0388052	0.0925487
P09417	QDPR	336395	342209	363342	365018	371789	374847	372227	365003	384314	1.07639	0.0389183	0.092756
O60462	NRP2	10285	12600	11067	9401	8289	6869	9931	7656	8611	0.771619	0.0389409	0.092756
Q07666	KHDRBS1	4652912	4414505	4298601	4893056	4994772	4673729	4672093	4867854	4809074	1.07354	0.0390711	0.0930078
O15066	KIF3B	473916	488690	480248	555579	542867	494264	562703	545457	517406	1.12663	0.0391048	0.0930299
P49903	SEPHS1	155951	173784	166571	192035	164894	193005	220677	209318	187067	1.24331	0.039155	0.0930911
Q8N0Z6	TTC5	34706	35175	33981	36240	33002	35222	39513	36144	39219	1.10604	0.039312	0.0933606
O14917	PCDH17	101259	96492	92335	101822	127537	117783	115317	125044	142219	1.31885	0.0393175	0.0933606
Q9BQG0	MYBBP1A	113154	111152	104793	112797	116914	114144	115462	126677	130426	1.13208	0.0394876	0.0937057
P13637	ATP1A3	6456498	8241295	6351203	7702748	8455890	8375765	8921946	8574796	9194386	1.26805	0.0395195	0.0937057
Q96SZ5	ADO	91384	98434	79818	95872	99045	94106	106237	121217	104823	1.23232	0.0395367	0.0937057
Q9H0W9	C11orf54	1283711	1162031	1362255	1516968	1385107	1549326	1443547	1409656	1528841	1.15075	0.0396669	0.0939107
O60832	DKC1	391161	300626	291168	403827	392953	337649	415113	473830	439576	1.35156	0.0396726	0.0939107
P61019	RAB2A	1348083	1287339	1380800	1451510	1522017	1506071	1385203	1341473	1488657	1.04958	0.0397316	0.0939919
P29692-2	EEF1D	1611774	1570100	1698119	1495052	1248904	1422000	1498543	1459607	1377632	0.888481	0.039829	0.0941638
Q9UPT8	ZC3H4	309191	286472	260063	295237	285547	276653	310402	332819	342300	1.15168	0.0399177	0.0943149
Q8IZ83	ALDH16A1	78265	68392	78070	65845	56113	66798	63762	62138	65485	0.851633	0.0399643	0.0943406
Q02447	SP3	27532	26791	21840	32215	38310	30072	31461	36800	41149	1.43652	0.0399875	0.0943406
P05387	RPLP2	6595127	6276637	6587905	6049488	5570370	5899051	5801760	6347312	5973428	0.931285	0.040003	0.0943406
Q99081	TCF12	27765	23945	20494	29484	29309	26883	28643	33687	36104	1.36328	0.040071	0.0944425
Q969E2	SCAMP4	68131	68726	67949	66018	63878	60177	66535	71085	68792	1.00784	0.0401276	0.0945174
Q14103	HNRNPD	2668138	2800572	2618708	3039325	2763812	2986797	3187151	3314151	2900587	1.16253	0.0401759	0.0945724
O95340	PAPSS2	42760	34333	53645	32655	24240	27804	31494	27699	28703	0.672306	0.0406596	0.0956519
Q9NWU2	GID8	164687	162293	172513	173821	182526	174427	188522	185483	174408	1.09794	0.0407721	0.0958573
A3KN83	SBNO1	38697	38020	35266	40550	47256	40310	44524	43535	49644	1.22968	0.0408931	0.0960471
O00442	RTCA	81429	89791	88900	81319	68402	78022	98947	99175	84743	1.08744	0.0409181	0.0960471
Q9C0H2	TTYH3	231882	191485	197201	179621	154807	172216	180941	161741	154535	0.801229	0.040952	0.0960471
Q08752	PPID	803432	848738	873873	796534	745466	794240	791833	736996	719300	0.88998	0.0409538	0.0960471
P11441	UBL4A	329837	311207	349451	364976	378510	372399	365378	371148	420088	1.16771	0.0410113	0.0961225
P61088	UBE2N	1084028	1142714	1120447	1136378	1162999	1149253	1096072	1068819	1105145	0.97695	0.0412777	0.0966873
P30038	ALDH4A1	412953	394735	396996	396043	409981	398755	412445	463777	448762	1.09986	0.0413951	0.0968791
Q9UBV2	SEL1L	65379	59158	69198	67541	59957	63703	79766	70732	74088	1.15924	0.0414105	0.0968791
Q9GZP9	DERL2	84957	82633	93941	79560	71974	79165	88629	85456	87819	1.00143	0.041498	0.0970242
Q8WU79	SMAP2	54934	56498	58614	52214	54988	48485	52152	50464	48935	0.891235	0.0415779	0.0971343
P98082	DAB2	12155	11737	9562	10898	11177	9476	12100	14980	14946	1.25623	0.0415962	0.0971343
Q9Y2V2	CARHSP1	1072639	1133585	1181515	980034	874482	1159132	930998	852713	725763	0.740752	0.0417943	0.0975371
Q05519	SRSF11	429121	484344	458528	565257	467782	523792	583634	555498	527635	1.21485	0.0419862	0.0979248
P23610	F8A1	6152	6495	6896	7535	6035	7569	8679	7650	8241	1.25723	0.0420587	0.0979653
Q9Y2W2	WBP11	138450	127131	130796	149895	135584	135940	144166	151534	157149	1.14247	0.0420938	0.0979653
Q9BUF5	TUBB6	18273475	18624632	20587982	21480679	22114168	24009482	21934782	19945703	22011041	1.11143	0.042098	0.0979653
Q9H6F5	CCDC86	178195	199555	159159	145097	179474	154751	203024	228590	196849	1.17052	0.0421065	0.0979653
P63027	VAMP2	738675	896860	724224	870286	915892	890972	934583	927523	961503	1.19657	0.0422462	0.0982301
P22392-2	NME2	1287908	1282165	1305384	1345738	1470321	1528578	1491314	1455836	1707690	1.20111	0.0423322	0.09837
O75030	MITF	32311	28685	25353	31410	36134	33299	35281	34907	39988	1.27594	0.0425835	0.0988124
P61764-2	STXBP1	3692887	4058319	3494653	4147488	4936210	4617174	4278930	4479183	4960873	1.21991	0.0425895	0.0988124
Q07955	SRSF1	2961885	2553608	2608640	2682657	2540147	2518047	2958564	3254443	2912697	1.12328	0.0426005	0.0988124
O15460	P4HA2	38316	33235	39715	32809	31240	36970	29641	28242	31050	0.799283	0.0426356	0.0988335
Q14254	FLOT2	794048	762176	686065	671333	702020	634335	638209	659895	649415	0.868541	0.0426916	0.0989031
P54687	BCAT1	192514	196847	188659	187572	188811	227449	175522	158849	141478	0.82324	0.0427199	0.0989085
Q9NSK0	KLC4	58590	52744	59709	51246	46197	51571	51896	49563	51587	0.894781	0.0428178	0.0990747
P12004	PCNA	485404	542772	513536	490006	478969	478543	515402	547736	550219	1.04647	0.0429238	0.0992596
P31431	SDC4	28071	26750	28463	20516	25759	22391	18827	23485	23734	0.793021	0.0429636	0.0992914
Q13618	CUL3	420091	408783	448192	463759	487642	482339	455672	443557	490961	1.08858	0.0429988	0.0993123
Q13308	PTK7	878912	640422	492913	959865	880600	835423	953231	976789	1076976	1.49435	0.0431816	0.099674
P52888	THOP1	117303	124341	126671	131419	129109	131712	130264	133071	142061	1.10068	0.0433564	0.0998707
Q86U28	ISCA2	19656	23395	20623	21599	22307	23492	25396	24085	28619	1.22656	0.0433637	0.0998707
Q14683	SMC1A	697020	628569	632663	672484	627363	637529	692737	741694	722104	1.10126	0.0433659	0.0998707
Q6YP21	CCBL2	1586033	1524489	1602202	1721243	1897280	1868480	1632511	1841254	1915208	1.14349	0.0433718	0.0998707
Q15814	TBCC	217833	226527	216704	234933	218132	237858	256469	252577	232887	1.12233	0.0434047	0.099886
Q96B36	AKT1S1	99427	86650	84801	83448	74028	72674	72234	77043	78015	0.839094	0.0434715	0.0999791
Q9UNI6	DUSP12	45518	43579	48837	36768	37056	44329	38359	39734	38077	0.842214	0.0435904	0.10009
Q07065	CKAP4	8414348	7632060	8166065	7974223	7941702	7787883	8437679	8740705	8519251	1.06134	0.0435916	0.10009
O60925	PFDN1	470947	493011	465726	453051	436672	435696	459013	434730	416026	0.916125	0.0436114	0.10009
Q99504	EYA3	9876	10341	9307	10803	11138	8623	11279	12711	13175	1.25881	0.0436248	0.10009
Q9Y4C1	KDM3A	72675	63898	68828	81051	75177	90602	88798	78642	81085	1.20995	0.043662	0.100115
P28288	ABCD3	143297	131405	143839	153704	147752	160616	156046	164383	188096	1.21499	0.0437694	0.100301
Q9Y4X5	ARIH1	552437	526067	536902	557454	538843	541641	593586	562038	566173	1.06586	0.043798	0.100305
Q9Y6M1	IGF2BP2	603656	531703	668380	542827	340229	468869	465146	350495	312123	0.625237	0.0438412	0.100344
P17480	UBTF	139600	84686	118572	162515	236872	182659	171880	350465	326453	2.47565	0.0439177	0.100459
P19525	EIF2AK2	282767	283757	268634	251282	235898	262083	270892	275157	256374	0.960804	0.0439683	0.100495
P06730	EIF4E	199584	188409	197110	190860	165960	176672	219332	213608	192661	1.06922	0.0439864	0.100495
A6NNZ2		4750072	4678365	4886539	5241800	5467693	6098686	5682865	5083685	5712206	1.15115	0.044147	0.100755
Q96F07-2	CYFIP2	618898	590617	636923	685064	659315	667717	659428	628919	678145	1.06502	0.0441743	0.100755
Q14699	RFTN1	116960	108512	113018	110205	122011	128803	125888	130677	139140	1.16903	0.0442062	0.100755
Q96CW1	AP2M1	390299	373129	373512	394425	406432	410034	406137	399808	435561	1.09197	0.0442063	0.100755
Q01813	PFKP	1162671	1071491	1114968	1293290	1234954	1397574	1218405	1299473	1439760	1.18169	0.0442844	0.100873
Q13242	SRSF9	61192	49731	54549	56436	61979	66389	64078	71038	70128	1.24035	0.0444185	0.101118
Q8IXQ4	GPALPP1	26062	26495	21254	27778	31306	27338	29770	31995	29598	1.2378	0.0444584	0.101121
Q9NQ48	LZTFL1	458554	423909	440214	412672	398479	414057	401345	422385	388602	0.916574	0.044473	0.101121
Q86WG5	SBF2	20870	21969	22071	24522	21970	23694	24627	23344	25775	1.13613	0.044536	0.101164
Q15223	PVRL1	272352	310283	273953	291484	325893	310597	337118	353186	318408	1.17759	0.0445452	0.101164
Q8TB52	FBXO30	48919	49998	55721	45524	44462	47308	47305	45999	46802	0.906026	0.0445716	0.101164
Q9Y5V0	ZNF706	47766	48800	45798	43276	37544	43468	44723	41696	42831	0.907884	0.044701	0.101397
Q13367	AP3B2	49256	54365	56413	61940	60349	63791	64819	56040	60955	1.1361	0.0450029	0.102021
P42356	PI4KA	2135	2892	2638	3057	3342	3572	3236	2858	3210	1.21383	0.0451494	0.102292
Q8N126	CADM3	150072	174271	150236	164175	208843	211843	206186	199202	240269	1.36048	0.0453442	0.102672
P31150	GDI1	7206816	7441675	7903584	7139370	6844406	7377228	7059544	6301228	6335327	0.873361	0.0453876	0.102709
Q7L1Q6	BZW1	217599	217679	274493	229392	162528	187793	168343	158087	164383	0.691509	0.0454928	0.102886
O95218	ZRANB2	89252	67029	73808	87289	88114	84396	89437	102215	109250	1.30776	0.0456541	0.10319
P25786	PSMA1	804370	826023	821459	895699	856898	836632	825569	799175	820633	0.997359	0.0459562	0.103756
Q96ME7	ZNF512	376130	339673	356986	426337	383927	401155	416395	415762	380716	1.13058	0.0459598	0.103756
P50991	CCT4	5147687	5311929	5276954	5016598	4783051	5240190	5406757	5330285	5485289	1.03087	0.0459864	0.103756
Q9BY32	ITPA	506523	503788	508036	522837	539602	553959	559676	572920	670214	1.18735	0.0460974	0.103945
Q9BXW7	CECR5	520850	481723	475314	573152	614327	562174	518539	617464	619446	1.18781	0.0461948	0.103987
Q15126	PMVK	203798	185364	197182	169727	148710	180692	174748	151185	168443	0.84315	0.0461965	0.103987
Q9Y4J8	DTNA	128108	109628	112457	121745	114642	114928	127655	134455	134486	1.13251	0.0461981	0.103987
O75896	TUSC2	83411	92893	96625	85513	88334	97426	103546	104119	101731	1.13361	0.0463045	0.104165
P78524	ST5	18297	15986	17484	17388	11559	12799	11514	11895	12992	0.70317	0.0465195	0.104586
Q9Y295	DRG1	43942	42473	48972	44807	39793	42758	37742	38669	39227	0.854129	0.0468421	0.105208
P61970	NUTF2	289985	288747	282182	262927	212926	238617	271491	234845	228387	0.853422	0.0468512	0.105208
P08708	RPS17	10328182	10316665	10294759	9938607	9731897	9659253	9667161	10211199	10221963	0.972874	0.0469435	0.105291
P0CW22	RPS17L	10328182	10316665	10294759	9938607	9731897	9659253	9667161	10211199	10221963	0.972874	0.0469435	0.105291
P53999	SUB1	2797289	2261011	2506339	2770431	2907376	2998338	2818885	3441689	3477588	1.28733	0.0470308	0.105424
Q99497	PARK7	4064053	4063055	4212865	4216941	3907749	4399769	4493169	4423665	4708328	1.10415	0.0474185	0.10621
Q9H7C9	AAMDC	145683	111534	148166	125993	92642	98502	90010	98160	94968	0.698446	0.0474372	0.10621
Q8N392	ARHGAP18	82114	73905	53715	86032	99805	93986	85616	93491	94647	1.30524	0.0475448	0.106338
Q7L592	NDUFAF7	227560	191243	198051	223170	276260	251368	240731	271170	293755	1.30607	0.0475502	0.106338
P48506	GCLC	393910	350928	395189	394605	405798	410824	414129	422140	431756	1.11228	0.0478564	0.10696
O95670	ATP6V1G2	452283	523787	466361	482594	440952	473018	561058	536232	514699	1.11755	0.0479308	0.107063
P13639	EEF2	15237335	16117853	16644153	15086226	14547429	15884897	16970836	16484229	16683500	1.04457	0.0480534	0.107274
Q9UHY7	ENOPH1	208146	206221	215620	207907	217394	226703	196272	201068	203386	0.953553	0.0481542	0.107436
Q14376	GALE	138707	137159	130681	115847	123846	129650	127757	118434	114149	0.886343	0.0483066	0.107666
Q9ULP0-7	NDRG4	391790	456148	355702	465261	527971	482728	474723	453814	484398	1.17389	0.0483166	0.107666
P02794	FTH1	1807287	1851849	2220293	1508764	1215017	1690666	1654677	1466944	1372474	0.764376	0.0483423	0.107666
Q9P2W9	STX18	54647	49245	53839	55266	58949	56443	56875	61630	66742	1.17445	0.0487991	0.10862
O75131	CPNE3	72773	55131	71722	76965	69282	81754	85306	85002	83056	1.26919	0.048989	0.108979
O95302	FKBP9	103964	94581	85123	78740	72140	83596	88159	90827	91903	0.954951	0.0491438	0.10926
Q8WXG6	MADD	66740	62671	60502	68612	78535	67964	55813	59796	64344	0.947555	0.049275	0.109454
P35221	CTNNA1	2192413	1743344	2075717	1766837	1635752	1744246	1589251	1708497	1636618	0.820825	0.049289	0.109454
Q9Y4B6	VPRBP	1978	1971	1981	1902	1433	1744	1311	1736	1401	0.750084	0.0496338	0.110156
Q96AJ9	VTI1A	514227	560424	545549	526714	490020	517938	598204	588715	541852	1.06701	0.0496738	0.11018
Q7L2H7	EIF3M	53282	59374	61069	63665	61929	67520	64378	64336	68320	1.13417	0.0497159	0.110209
P17600	SYN1	1410185	1659240	1290189	1651379	1937242	1766508	1750667	1875287	2190445	1.33415	0.0497551	0.110232
P10768	ESD	1105893	1061743	1144718	1196381	1049909	1239754	1351324	1217029	1310812	1.17112	0.0498178	0.110307
Q6P995	FAM171B	25697	25230	25267	25569	27671	22107	29839	29254	28206	1.14575	0.049968	0.110525
O00330	PDHX	456439	437828	415999	472672	558834	484550	485593	557449	566775	1.22862	0.0499743	0.110525
Q86UU1	PHLDB1	70820	60396	66411	80266	81716	72701	72213	79070	85357	1.19741	0.050091	0.110718
P08842	STS	110525	109504	101306	123105	142400	121018	120394	160132	150871	1.34251	0.0502073	0.110911
P12236	SLC25A6	6097813	6406929	6085317	6349321	8053758	7414565	7331408	8308826	9752001	1.3659	0.0502735	0.110953
Q8WVK2	SNRNP27	24316	26367	23637	23076	23330	25176	29835	27099	26134	1.11771	0.0502926	0.110953
Q9BY11	PACSIN1	336180	324948	259006	374850	501265	434000	422170	510667	687798	1.7613	0.0503138	0.110953
Q9GZR7	DDX24	153335	137465	162416	134810	127000	129778	134492	141936	134218	0.906071	0.0503719	0.111017
P35612	ADD2	770265	684657	750525	681475	687983	670414	666554	670886	676201	0.913031	0.0504013	0.111017
O95394	PGM3	1263456	1080203	1359890	1058863	1044146	1019487	1077190	969057	1036974	0.832504	0.0504329	0.111022
Q13546	RIPK1	9071	9356	9171	8232	6629	8932	9861	9338	10237	1.0666	0.0504799	0.111062
P54829	PTPN5	28657	32350	28827	28896	25668	27417	26267	24686	26352	0.860532	0.0505379	0.11107
Q96RQ3	MCCC1	28228	28927	29266	29542	35505	31631	32960	38137	33938	1.21539	0.0505609	0.11107
Q96A26	FAM162A	118879	115121	94136	137282	140508	132593	120171	145421	153059	1.27585	0.050578	0.11107
P13861	PRKAR2A	4682196	4432887	4530704	5185263	4982214	4767548	5074543	4903116	4714455	1.07668	0.0506259	0.11107
P49918	CDKN1C	70310	66893	48356	82903	83222	77223	70748	73253	78820	1.20081	0.0506501	0.11107
P54764	EPHA4	22528	25697	22404	21855	22424	22953	20604	20568	16951	0.822934	0.0506895	0.11107
O00233	PSMD9	61123	52889	57877	63154	66037	63254	61894	64829	69030	1.13883	0.0507097	0.11107
Q96DE0	NUDT16	106205	117520	114601	115852	119550	123618	121092	126666	134373	1.12948	0.0507171	0.11107
Q4VC31	CCDC58	100075	105021	107623	106046	135992	117046	127058	125415	130628	1.22506	0.0509089	0.111371
Q8NFX7	STXBP6	65831	71810	57209	60012	58160	62659	53774	53576	41270	0.762741	0.0509131	0.111371
O75792	RNASEH2A	91366	88341	81695	85779	85668	86376	90526	101920	110173	1.15768	0.0511443	0.111812
Q08623	HDHD1	191795	192215	239357	186525	163299	189633	167340	162027	148936	0.76729	0.0511983	0.111866
Q13630	TSTA3	579700	586170	570650	567299	507999	492603	516159	521703	539648	0.908432	0.0512732	0.111874
O43237	DYNC1LI2	1925114	1694744	1923311	1787538	1551502	1579181	1652678	1478859	1381689	0.814196	0.0512786	0.111874
Q15388	TOMM20	60927	61960	53146	58394	56308	53971	63537	70299	63457	1.12077	0.0513091	0.111874
O00148	DDX39A	259347	237597	242548	272747	240824	251183	272323	274465	282813	1.12185	0.0513247	0.111874
P45954	ACADSB	237802	235401	235223	270882	285271	273877	247329	302479	313055	1.218	0.0513489	0.111874
P49721	PSMB2	550293	549173	579120	585956	684056	709280	564613	562293	604266	1.03133	0.0514183	0.111892
O00764	PDXK	763857	721324	771507	750232	773374	744558	793052	819537	901939	1.11426	0.0514581	0.111892
P57087	JAM2	7015	5183	5461	4792	3731	4299	4890	3794	3823	0.708251	0.0514796	0.111892
P36915	GNL1	203831	194387	201688	223487	216897	218644	204203	188699	214487	1.01247	0.051512	0.111892
Q13144	EIF2B5	71500	62611	69698	78394	82164	78602	74579	75805	87822	1.16877	0.0515129	0.111892
Q96S66	CLCC1	18770	17373	18380	21581	18483	19423	20009	22412	21720	1.1764	0.0515814	0.111892
P12429	ANXA3	139930	130573	145279	161964	210629	195343	159599	219164	223176	1.44773	0.0515837	0.111892
P62072	TIMM10	117882	142904	112723	136711	146116	146550	140863	173494	174891	1.30987	0.0515925	0.111892
P63313	TMSB10	739495	726125	914770	753839	743658	631808	650184	553127	571513	0.745602	0.0517203	0.112105
O75717	WDHD1	2042	2123	1731	1512	1306	1599	1733	2457	2625	1.15587	0.0518572	0.112238
Q08117	AES	12551	11371	13174	14181	12849	13755	14602	13573	14647	1.15436	0.051887	0.112238
Q9GZU8	FAM192A	130236	124486	122336	121767	98252	97926	107786	106926	110301	0.861971	0.0518987	0.112238
Q8IWW6	ARHGAP12	126837	112112	129187	125574	118980	117052	108321	107284	109472	0.883035	0.0519246	0.112238
P48380	RFX3	76437	64230	82215	65434	46381	58958	57423	58008	55014	0.764732	0.0519294	0.112238
P63165	SUMO1	174840	174791	169674	165936	144534	146161	175170	169454	159620	0.970998	0.0520755	0.11249
P68036	UBE2L3	658619	680559	715477	714265	747124	786005	696486	691259	698334	1.01529	0.052124	0.112531
Q92804	TAF15	400181	374718	342256	385707	398504	361672	397176	502088	496655	1.24953	0.052304	0.112856
Q9NVA4	TMEM184C	158392	138513	130185	158760	162925	141292	164848	188327	171700	1.22896	0.0523667	0.112927
Q96JB5	CDK5RAP3	128326	116778	134655	142369	141930	151626	133921	135268	146779	1.09535	0.0527084	0.113599
Q9H3U1	UNC45A	241049	218239	201123	238017	235091	224894	240845	264729	275012	1.18197	0.0527478	0.11362
Q99575	POP1	3040	2553	2335	3228	2896	2522	3717	3920	3111	1.3557	0.0533459	0.114843
Q5T1M5	FKBP15	235373	214972	215830	249583	238380	235981	235365	243695	251971	1.09736	0.0533882	0.114869
Q96HE7	ERO1L	767704	707978	785674	761820	703523	752592	690635	684677	659880	0.899987	0.0534702	0.114967
Q9NZ52	GGA3	29600	29319	26561	34715	34281	32512	32601	33466	40941	1.25185	0.053494	0.114967
P62750	RPL23A	5206026	4313583	5269333	4362995	3958298	3921193	3837097	4361678	4165949	0.836079	0.0535615	0.11504
O75351	VPS4B	299089	273041	280403	305703	307027	322945	305141	302541	327638	1.09711	0.0535887	0.11504
Q96D46	NMD3	84888	77035	80836	82841	93833	85471	87941	95569	97572	1.15786	0.0537555	0.115333
Q9NQC3	RTN4	24422602	23493441	23729433	21162650	26481480	20975226	18524330	19282128	20066398	0.807767	0.0539092	0.115565
Q9NP92	MRPS30	58190	61668	53304	53314	64685	63126	68690	70367	66801	1.18882	0.0539275	0.115565
P04843	RPN1	2749950	2647371	2687547	2706421	2506323	2481236	2836414	2888133	2701559	1.04221	0.053984	0.115565
Q9H9Q2	COPS7B	32240	33761	35040	35634	33723	34241	32944	30122	30865	0.929633	0.0539852	0.115565
Q15056	EIF4H	535110	534123	524212	480713	415144	447215	548389	507046	455101	0.947969	0.0540412	0.11562
P62834	RAP1A	2170699	2049619	2299595	2277230	2350527	2200378	2398757	2352315	2451780	1.10475	0.0542076	0.115911
O60641	SNAP91	6120643	6247048	5674587	6929362	9238430	8609180	7516199	8543806	10784724	1.48788	0.0544144	0.116249
Q9NYR9	NKIRAS2	14596	11886	14459	14567	13589	16866	17340	17224	16557	1.24865	0.0544313	0.116249
Q13243	SRSF5	1890206	1682733	1717422	1809561	1873615	1803251	1884808	2059586	1981227	1.12008	0.0544571	0.116249
P60059	SEC61G	34650	43191	42567	32100	29708	33811	41484	38267	35776	0.959463	0.0545134	0.116303
O75044	SRGAP2	260485	254473	247625	278709	302005	282452	267881	263085	296779	1.08545	0.0545564	0.11633
Q9UPP5-2	KIAA1107	12943	14830	13246	13843	16737	16370	15407	19413	20037	1.33736	0.0546135	0.116386
O75934	BCAS2	637452	597571	637403	769621	682046	661389	690968	754063	714719	1.15345	0.0546593	0.116419
P19634	SLC9A1	27908	19467	23320	25342	24944	30885	30323	32303	39523	1.44493	0.0547285	0.116501
Q96QR8	PURB	82474	71866	84967	86593	93069	98545	88025	99888	103585	1.21809	0.0548643	0.116695
Q9HAT2	SIAE	502617	430802	437099	502414	492005	516351	529521	515643	603121	1.20267	0.0548808	0.116695
P61769	B2M	82787	93546	86301	78267	93433	90320	103392	116227	96329	1.203	0.0549752	0.116716
Q8N5K1	CISD2	341107	372347	382523	377232	389452	426578	437872	407365	414185	1.14913	0.054997	0.116716
O60493	SNX3	1235733	1061619	1066291	1036816	984402	1003936	929180	961033	1004643	0.860631	0.0550076	0.116716
Q9UPA5	BSN	15358	18305	16689	19247	21286	20178	21352	19145	18018	1.16212	0.0550237	0.116716
Q92922	SMARCC1	226594	226581	205501	224228	224609	215288	237270	269995	240061	1.13459	0.0550442	0.116716
Q9Y2Q3	GSTK1	131284	111791	108704	150055	156806	139233	134256	147949	176898	1.30509	0.0551056	0.116748
Q9BZE3	BARHL1	12286	12214	12782	18031	26498	19456	15504	17563	23763	1.52433	0.0551208	0.116748
Q9UJ41	RABGEF1	59657	54815	59617	60889	60425	60803	56899	56400	56621	0.976052	0.0551656	0.116778
Q8NDI1	EHBP1	197134	186075	182080	209897	202537	184766	176381	176860	177305	0.938539	0.0552771	0.116949
O94876	TMCC1	30744	32461	32846	30918	25004	25108	28913	25203	24557	0.819075	0.0553258	0.116987
Q9BYD3	MRPL4	87093	84051	77759	93197	109948	111225	98589	111412	137497	1.39612	0.0554036	0.117086
O94905	ERLIN2	2413074	2331962	2516613	2306132	1965542	2011363	2123248	2236756	1947349	0.868584	0.055444	0.117107
Q9NPF5	DMAP1	22731	20500	23559	21173	20295	21235	22970	25753	23677	1.08399	0.0555064	0.117173
Q13015	MLLT11	73310	77519	67721	65284	58513	66548	63990	63258	52844	0.824031	0.0557158	0.117489
P07902	GALT	31638	25313	27792	26314	21871	22284	21999	23114	23075	0.804645	0.0557175	0.117489
Q9Y2S6	TMA7	82389	79140	75352	81273	32970	37361	40578	43659	37588	0.514288	0.0557855	0.117567
P46778	RPL21	1835471	1683827	1768405	1656449	1631439	1523712	1502506	1654237	1616154	0.902641	0.0560142	0.117983
Q9ULJ7	ANKRD50	17195	17112	18435	19864	20010	16275	19806	21706	22912	1.22149	0.0563002	0.118461
O60331	PIP5K1C	211662	205923	208159	221514	237406	213755	223331	229610	245004	1.11538	0.0563032	0.118461
P55957	BID	32005	33458	30087	32990	37958	35829	35959	37961	43717	1.23116	0.0564076	0.118615
Q96JM2	ZNF462	11212	10814	13697	9994	8561	8708	9759	10054	7594	0.767209	0.0564575	0.118654
Q9BXP5	SRRT	1896243	1678269	1776037	1865356	1865565	1802612	1927133	1966455	1964397	1.09484	0.0566528	0.118999
O95989	NUDT3	81786	67929	82137	79731	75314	79430	68544	62372	67740	0.856822	0.0568538	0.119355
Q13547	HDAC1	87999	85724	81295	89972	92898	99784	91696	104979	96773	1.1507	0.0569972	0.11959
O75817	POP7	35562	35668	32186	34289	33498	35871	36743	38452	37718	1.09183	0.0570544	0.119644
Q86XL3	ANKLE2	58304	57588	57071	57080	50062	52980	58496	60620	57389	1.02048	0.0570883	0.11965
Q9BRA2	TXNDC17	799436	826667	851441	787165	731662	721927	783327	687718	749541	0.896285	0.0572014	0.119776
Q9Y282	ERGIC3	55158	50574	54974	57648	63967	61117	61243	55582	61862	1.11189	0.057216	0.119776
P00558	PGK1	28675092	30141472	28352593	32519747	29706981	33427253	29842502	28276867	28403768	0.992589	0.0572609	0.119776
Q99704	DOK1	2780	2278	2910	2208	2398	2204	1743	1236	2268	0.658509	0.0573013	0.119776
P78540	ARG2	24758	37189	24111	34181	39350	35770	38693	39503	42706	1.40489	0.0573061	0.119776
Q13442	PDAP1	631024	613230	615203	618143	536510	560480	566400	562872	539878	0.897655	0.0573548	0.119812
P18615	NELFE	159586	148504	158504	145865	139185	131526	140842	153592	144877	0.941527	0.0573919	0.119824
Q01167	FOXK2	31206	31437	30039	33299	32488	32734	32378	35982	38827	1.1565	0.0576837	0.120367
O00469	PLOD2	213722	169087	218300	174017	147646	188208	132644	140899	163529	0.727109	0.057733	0.120404
P53004	BLVRA	65524	67783	69715	67508	73505	80279	79087	75372	85659	1.18272	0.0578986	0.120652
Q16740	CLPP	467313	435782	429017	406860	447002	394085	378857	396907	399052	0.88192	0.0579155	0.120652
Q01780	EXOSC10	537927	517706	479699	517471	478681	447294	558029	609967	534002	1.10855	0.0580296	0.120762
Q9UBW8	COPS7A	42012	37470	37581	40205	42604	39552	41708	46339	46085	1.14581	0.0580317	0.120762
Q69YQ0	SPECC1L	42934	42353	41162	36635	39905	39966	39899	41571	40293	0.962942	0.0580656	0.120766
Q13564	NAE1	130084	122369	120330	115781	105668	116249	119399	120744	117283	0.958804	0.0582223	0.120964
Q9P2B4	CTTNBP2NL	27845	26326	30530	28295	23150	23888	23912	23208	20959	0.803757	0.0582245	0.120964
P56134	ATP5J2	242285	242865	245836	258752	308340	280402	269004	286313	316286	1.19237	0.0583137	0.121036
P31942	HNRNPH3	498883	483559	456746	466775	448711	495249	517133	537755	503702	1.08296	0.0583226	0.121036
Q04206	RELA	190772	181262	199008	184688	182225	174181	168648	176067	177074	0.913749	0.0584749	0.121286
Q03154	ACY1	37783	37363	37013	38662	37944	40743	40529	47183	41233	1.14966	0.0585151	0.121303
Q09666	AHNAK	8643937	4573199	4776903	4276094	3894318	3734072	2526984	2489251	2951580	0.442803	0.058648	0.121513
O75663	TIPRL	231537	241415	250362	262998	259735	271048	269895	248654	249217	1.06146	0.0587133	0.121582
Q9NPJ3	ACOT13	56958	65032	66356	73478	66364	84761	77833	75609	77952	1.22856	0.0588705	0.121841
P48556	PSMD8	533960	566434	577494	591359	593091	624288	595792	583983	579353	1.04842	0.059005	0.122053
P52292	KPNA2	104386	133101	139125	104311	91880	102315	103505	103694	96625	0.806729	0.0591914	0.122372
Q96K17	BTF3L4	1740300	1706780	1703049	1732642	1666511	1658234	1654143	1635736	1541346	0.938078	0.0595323	0.12301
Q14558	PRPSAP1	51785	51538	54124	49522	50772	51604	45204	50010	48955	0.915667	0.0597453	0.123383
Q709C8	VPS13C	158194	137869	137789	169192	162228	173379	157169	168873	187979	1.18478	0.0597868	0.123401
Q9Y653	GPR56	12568	12304	15073	10102	11644	12065	11454	9553	10160	0.780248	0.0599372	0.123645
Q16720	ATP2B3	182692	184544	187863	208493	218981	223571	196244	191982	230432	1.1145	0.0599847	0.123676
P63010	AP2B1	268087	244540	243169	283980	312473	305020	262829	279076	317636	1.13727	0.0600873	0.123779
Q9UL46	PSME2	1308226	1245965	1304447	1358035	1362141	1357348	1393119	1330911	1473552	1.08784	0.0601	0.123779
Q15014	MORF4L2	7963	8711	9603	6907	7622	7727	7572	7859	6827	0.847053	0.0601682	0.123803
Q9Y6V0-2	PCLO	112401	133394	107679	144560	161483	129236	151952	154694	137285	1.25591	0.0601766	0.123803
Q8TB72	PUM2	63277	57985	60034	59290	51790	58636	47271	50428	55674	0.845981	0.0604863	0.124373
O43488	AKR7A2	245758	240885	267460	314876	268772	314401	291361	267623	301264	1.14076	0.0605502	0.124437
O15031	PLXNB2	578976	478223	532629	520463	433620	454508	424783	398755	453074	0.802987	0.060682	0.124534
Q96FH0	MEF2BNB	301685	290426	275459	299548	279974	283211	303734	311824	316941	1.07484	0.0606893	0.124534
Q96F85	CNRIP1	908725	952379	902516	982166	920241	895950	1009536	984299	986118	1.07828	0.0606958	0.124534
P01893	HLA-H	90777	93236	98749	102590	122683	106761	103928	118012	124797	1.22625	0.0607481	0.124573
Q9H9C1	VIPAS39	56456	53181	53179	61992	56492	54650	59339	66398	61179	1.14802	0.0607854	0.124573
Q96CM8	ACSF2	242480	206326	205172	256093	250733	254417	234617	240301	263360	1.1289	0.060832	0.124573
Q9Y5X1	SNX9	206136	180319	192182	187162	205445	188520	207907	216073	224692	1.12103	0.0608458	0.124573
Q53F19	C17orf85	38147	32502	30179	34576	36218	36511	39832	39804	39197	1.17857	0.0610604	0.124946
Q9NRG9	AAAS	5749	5937	6055	5771	6597	6325	6510	6640	6539	1.1098	0.0611828	0.125129
P46777	RPL5	2888517	2716433	2785797	2738545	2542975	2671235	2779958	3020634	2916017	1.03884	0.0614815	0.125672
Q9BW92	TARS2	344546	332774	300273	353498	368288	321447	357880	416148	390299	1.19101	0.061551	0.125746
Q96QC0	PPP1R10	33694	39636	33801	37363	35823	35026	40087	41344	39894	1.13249	0.0616739	0.12593
Q15643	TRIP11	69323	73049	68655	72608	81479	92184	85759	80596	89452	1.2122	0.0619918	0.126511
Q00535	CDK5	218941	207797	204641	207020	208056	207254	218442	215717	221684	1.03875	0.0620451	0.126552
P28074	PSMB5	22598	22891	22833	24714	22006	23748	25218	24390	24795	1.08901	0.0621183	0.126633
P49916	LIG3	60248	61827	65339	62389	61694	69159	65995	79500	85009	1.22992	0.0621642	0.126659
Q5VT25	CDC42BPA	19551	19086	19954	21056	19016	20446	21429	22052	20682	1.0951	0.0624579	0.127058
Q6S8J3	POTEE	42238804	42629235	47478759	42700975	39014506	39951312	41005360	35193825	36214286	0.849386	0.0624875	0.127058
P27348	YWHAQ	6182386	6353545	6032790	6269979	5703158	5674469	5853700	5253677	5379529	0.887886	0.0624936	0.127058
Q12884	FAP	412643	320581	347407	498822	545946	611616	479999	503591	750906	1.60508	0.0625059	0.127058
Q9NVU7	SDAD1	16560	18031	16219	12986	15610	14921	14271	15751	14665	0.879492	0.0625268	0.127058
Q9Y2J2	EPB41L3	1172098	1091157	1033254	1140737	1286408	1217028	1224607	1339369	1544473	1.2463	0.0626123	0.127164
Q5HYI8	RABL3	19448	17061	17795	17104	14399	15564	15709	16247	16035	0.883747	0.0627251	0.12732
O15143	ARPC1B	194212	196813	202126	193945	181740	196758	173565	176162	190087	0.910079	0.0627597	0.12732
Q9P0L2	MARK1	34890	38530	36810	41055	39074	43113	38645	42034	43261	1.12438	0.0627897	0.12732
P18887	XRCC1	55568	56487	52358	51139	48616	49645	56830	58223	51442	1.01266	0.0628252	0.127324
C9JLW8	FAM195B	415378	398202	400376	414041	379144	368750	376885	361044	360534	0.904862	0.0629607	0.127531
Q96CV9	OPTN	137249	137050	135559	137751	129990	141546	132354	125234	119160	0.919216	0.0630372	0.127618
Q5VW32	BROX	14832	13259	15227	16748	16392	19803	15993	16212	17538	1.14832	0.0631221	0.127722
Q96DH6	MSI2	1138847	975652	1084892	1174630	1115367	1178587	1190427	1197025	1185617	1.1168	0.0631623	0.127735
Q16850	CYP51A1	91019	89997	96171	98841	105674	112627	98642	101567	111454	1.12438	0.0632075	0.127758
O60437	PPL	98057	72112	59312	104674	104911	103402	100181	111315	143910	1.54874	0.063316	0.12791
Q92733	PRCC	412864	416501	384749	435878	390773	414041	440765	468709	437913	1.10977	0.0634487	0.12811
A6NDU8	C5orf51	132025	134650	142866	127790	129387	137613	128338	118230	124058	0.904979	0.0636527	0.128454
Q9UNE7	STUB1	120426	108894	111311	125892	126391	120487	124295	121550	135458	1.1194	0.063717	0.128515
Q16576	RBBP7	406832	422711	384749	432546	398722	430108	451426	459932	431290	1.1057	0.0638475	0.12871
Q99418	CYTH2	105283	103362	111051	104033	92522	96945	96316	98959	89583	0.891028	0.0639513	0.128848
Q86YP4	GATAD2A	28431	33258	30013	25758	27018	26409	27603	30705	28783	0.949718	0.0639836	0.128848
P24928	POLR2A	154821	150748	165476	149169	150353	152171	158508	168328	179542	1.07501	0.0640195	0.128852
P62306	SNRPF	612179	619047	629968	574812	601758	620946	636427	628716	664533	1.03679	0.0642594	0.129266
Q96L14	CEP170P1	248895	249553	259598	276367	288798	273034	282173	259868	251244	1.04649	0.0643546	0.129389
P24844	MYL9	208113	179374	187756	183257	179605	204712	166138	153137	171256	0.852737	0.0644466	0.129506
Q16540	MRPL23	42919	39848	40506	39225	35128	35344	40778	49578	42369	1.07668	0.064561	0.129667
O43684	BUB3	47901	46303	46881	49551	44537	52425	59298	52203	52624	1.16331	0.064695	0.129868
Q9HAP6	LIN7B	22332	25250	21108	27068	31226	24071	30824	28604	27535	1.26602	0.0650225	0.130446
Q9BTV5	FSD1	405177	407422	408074	418741	525232	471086	456693	502971	540755	1.22917	0.0650738	0.130446
O00192	ARVCF	249396	185131	218631	197126	148051	163219	169187	158989	168952	0.761114	0.0650856	0.130446
Q9H0A0	NAT10	158385	159999	151852	177271	182496	157140	170624	201063	185953	1.18587	0.0652023	0.130611
P52655	GTF2A1	112379	113800	105991	118429	104640	114822	128089	132617	116662	1.13607	0.0652447	0.130627
O14936	CASK	860304	896659	896706	914084	908746	968837	893161	865033	843108	0.980266	0.0654954	0.13106
Q99615	DNAJC7	155884	164663	171577	146412	145425	154959	153761	164931	164798	0.982456	0.0655416	0.131083
Q9Y4F5	CEP170B	14637	12722	10495	12851	14725	16203	16860	15443	18590	1.34446	0.0656072	0.131145
P36507	MAP2K2	722325	678678	731080	713204	697074	676744	644917	631763	682505	0.918907	0.0657801	0.131422
Q96SB3	PPP1R9B	62752	57329	58424	58059	57582	53811	54838	53807	54240	0.912495	0.0660102	0.131812
Q5K4L6	SLC27A3	1190	1272	1843	1142	1507	1600	345	1188	458	0.462485	0.066165	0.131988
Q8WZ82	OVCA2	143964	123669	117705	118712	116387	119607	105641	113188	105276	0.841093	0.0661675	0.131988
Q9NRW1	RAB6B	363721	316792	347308	339396	394092	348661	296482	292678	323385	0.887844	0.0665953	0.132772
Q14249	ENDOG	30548	32553	27639	30374	29144	32300	34496	32857	35967	1.13864	0.0666942	0.132899
P78417	GSTO1	62303	69049	71489	83737	84307	112819	83596	77703	92964	1.25351	0.0669056	0.133251
P19021	PAM	218389	222447	204149	232707	231479	240467	235902	222586	248212	1.09568	0.0670832	0.133535
Q99627	COPS8	4263524	4050481	3970678	3941311	3645085	3811049	4018466	4002921	3950122	0.974507	0.0672252	0.133704
Q9UKU7	ACAD8	4381	4793	4755	5315	5963	5260	6215	5040	5470	1.20073	0.0672388	0.133704
Q9Y5M8	SRPRB	634294	671606	691673	635433	524686	558016	664501	661706	611534	0.970048	0.0677025	0.13451
P02787	TF	261791	323113	298022	229630	245492	224726	264856	268714	211669	0.844056	0.0677145	0.13451
Q15070	OXA1L	19139	16987	15513	16827	18923	14853	19164	22145	21051	1.20761	0.068008	0.134985
Q09028	RBBP4	820381	910804	775877	723887	603342	633078	819566	825858	659389	0.919328	0.068025	0.134985
Q53HC0	CCDC92	15394	15646	14306	16053	16333	17704	16876	15931	16702	1.09181	0.0681179	0.135099
Q9UK41	VPS28	456201	434922	446929	426706	399618	402863	415488	435180	391218	0.92813	0.0684351	0.135658
P10636-2	MAPT	4337608	5029076	4034519	5073168	5773268	4679713	5447989	5498754	5513738	1.22828	0.0685986	0.135911
P00441	SOD1	26679	33005	34195	29953	19614	25260	37054	36182	31356	1.11411	0.0686713	0.135982
P80723	BASP1	326633	407304	397262	479110	522897	408996	441518	472226	472985	1.22589	0.0687058	0.135982
P21266	GSTM3	76062	81139	74716	84812	77510	87155	83054	87903	90529	1.1275	0.068763	0.136024
Q9UNZ2	NSFL1C	1231897	1290595	1217613	1206172	1111704	1119718	1169999	1137254	1017551	0.88896	0.0688896	0.136169
O75821	EIF3G	911676	947828	920711	918744	962171	896435	850241	893691	875991	0.942345	0.0689078	0.136169
Q9HD20	ATP13A1	26633	26432	30824	28198	30169	30478	30984	33031	32075	1.14544	0.0690068	0.136294
O94874	UFL1	190637	172600	207301	223379	204552	248820	225389	216860	230548	1.17923	0.0693148	0.136831
Q9NZ32	ACTR10	286743	300419	308382	330076	310566	330880	314349	299356	316092	1.03825	0.0694267	0.136981
P08865	RPSA	2227345	2339764	2348617	2601908	2410188	2634554	2362598	2471677	2595054	1.07427	0.0695106	0.137074
P20290	BTF3	1124568	1332786	1136640	1101776	988980	960885	1003150	1083855	976932	0.852516	0.0695785	0.137074
Q02252	ALDH6A1	616451	560317	634913	657952	626304	674261	644791	688033	698105	1.12102	0.0695821	0.137074
P68104	EEF1A1	26956609	24621983	29928965	26427282	23593572	25831540	23327444	22125491	23166781	0.841882	0.0697588	0.137351
P52298	NCBP2	18343	17574	16870	17914	17952	18281	17361	16668	16162	0.950821	0.0702345	0.138216
O75348	ATP6V1G1	366233	397179	365736	376473	355772	372562	389240	403146	402226	1.05798	0.0704326	0.138534
Q5T0N5	FNBP1L	239694	220383	229538	293817	258204	248019	259317	255156	244295	1.10028	0.070715	0.139004
Q15642	TRIP10	105659	85613	97617	90605	78803	84504	77411	79206	83761	0.832077	0.0707444	0.139004
P21281	ATP6V1B2	2207490	2399581	2281483	2192963	2296589	2389831	2487179	2416498	2498177	1.07451	0.0709056	0.139249
Q96GA7	SDSL	232642	229711	238416	227179	220298	236380	200090	214720	224591	0.912428	0.0709987	0.13936
P46976	GYG1	76114	56202	61897	53581	53605	50976	49607	53766	51653	0.798227	0.071084	0.139455
Q9C0H9-5	SRCIN1	230679	256582	244880	269247	271486	266316	271312	259558	246029	1.06113	0.0711495	0.139512
P62328	TMSB4X	30544	28426	42220	29458	30063	21488	23315	19163	21377	0.631041	0.0711955	0.13953
Q96GD0	PDXP	414546	491034	429835	504957	496129	552333	683849	553847	515774	1.31305	0.0712326	0.139531
O75477	ERLIN1	99251	99619	102389	97741	91158	98481	91598	96552	92443	0.931401	0.0713711	0.13973
Q9NPQ8	RIC8A	765114	724197	695050	701339	636047	577084	639016	595747	660290	0.867555	0.0714615	0.139835
Q9NZ08	ERAP1	54789	50243	51481	48702	39412	47369	43462	47636	42077	0.850888	0.0715508	0.139938
Q9NR30	DDX21	347411	384436	415359	334718	338151	314740	343022	370158	363436	0.938468	0.07184	0.140431
Q15042	RAB3GAP1	200767	195544	189171	189589	167867	153325	178128	171544	174342	0.895013	0.0721342	0.140928
P08237	PFKM	3559968	3276965	3366158	3583957	3282996	3494776	3766775	3784168	3576541	1.0906	0.0721679	0.140928
O60739	EIF1B	233824	257140	272140	231715	201785	215411	239387	234028	211903	0.898066	0.0722509	0.140966
Q01814	ATP2B2	179367	176476	178128	198853	196758	195038	188675	181640	209482	1.08582	0.0722618	0.140966
Q9H6U6	BCAS3	265167	261421	230000	290875	281716	265818	277692	278033	287113	1.114	0.0724878	0.141335
Q9NQT8	KIF13B	23123	19727	18592	21783	24751	23199	22957	25804	27771	1.2456	0.0725452	0.141374
Q66K14	TBC1D9B	231000	243554	249579	269054	277148	284515	245797	240118	282683	1.0614	0.0725922	0.141393
P61266	STX1B	1045306	1265875	1009130	1289627	1473233	1276020	1265042	1259194	1345012	1.16533	0.0729197	0.141958
P32119	PRDX2	3196099	3065227	3124117	3283370	3221649	3456775	3186044	3048796	3182212	1.00337	0.073699	0.14334
P14868	DARS	118755	115698	122736	116203	108647	121215	104800	111571	108700	0.910081	0.0737331	0.14334
P49755	TMED10	2406542	2342629	2515045	2530943	2455683	2532990	2594734	2545255	2537983	1.05696	0.0737425	0.14334
Q6UX04	CWC27	85702	80879	81703	80457	76217	72017	83793	86840	80226	1.01037	0.0738791	0.143459
P27797	CALR	15060727	14812388	15435263	14066527	14657817	13330340	14670112	14170022	13826216	0.941688	0.0738971	0.143459
Q99733	NAP1L4	2045789	2123199	2037308	2021910	1989094	2006769	1982617	1993053	1853080	0.939167	0.073917	0.143459
Q9H0Q3	FXYD6	54134	62532	54334	62715	77236	81185	62542	66348	74728	1.19075	0.0742194	0.143973
Q96I99	SUCLG2	1366833	1199089	1208276	1539828	1593752	1328815	1374886	1610484	1619342	1.22005	0.0743725	0.144135
Q29RF7	PDS5A	101932	97694	92878	104978	97585	102172	103286	116941	108462	1.12371	0.0743983	0.144135
P36873	PPP1CC	216468	237282	238988	249882	219940	255722	264252	254151	273970	1.14383	0.0744166	0.144135
P62942	FKBP1A	504447	527775	455696	475537	457124	446071	542152	579478	494074	1.08588	0.0745328	0.144286
P36871	PGM1	408310	351986	364224	463937	435004	476107	392536	415897	491884	1.15633	0.075017	0.14515
O43157	PLXNB1	4042	4791	4103	3278	3456	4155	3212	3773	2840	0.759508	0.0751658	0.145364
Q6P4E1	CASC4	16499	15968	15622	19474	21428	16169	19661	19640	18877	1.2098	0.0753325	0.145612
Q9P2I0	CPSF2	27809	29765	29390	29161	28112	29130	29803	30729	32465	1.06937	0.0754514	0.145768
P32004	L1CAM	646965	809810	610246	734031	832865	817655	878767	854055	821548	1.23577	0.075543	0.145871
Q9H1A4	ANAPC1	37149	38944	36413	41101	34573	44645	45391	42967	46248	1.19643	0.0756987	0.146097
Q96AB3	ISOC2	210283	245824	209435	231065	215438	254741	300220	269170	247353	1.22718	0.0758947	0.146401
Q9H4A4	RNPEP	314329	244542	282374	336583	367625	400608	308342	298733	381568	1.17521	0.0767432	0.14794
P46063	RECQL	3750	3936	3895	3617	4028	3219	5823	4249	4430	1.25222	0.07677	0.14794
P62701	RPS4X	838464	844359	835847	789774	760706	863557	905019	848797	932083	1.0664	0.0768339	0.147988
P59998	ARPC4	671042	637750	619991	624439	536092	539749	594991	598885	568465	0.913706	0.076936	0.148047
P22314	UBA1	27364644	27081045	30593119	29700824	27025108	30335843	26468423	24728103	25357669	0.900227	0.0769783	0.148047
Q9Y4I1-2	MYO5A	2889872	2776788	2579460	3073763	3355670	2923188	2979845	2880555	2899018	1.06225	0.0769812	0.148047
Q5BKZ1	ZNF326	102976	89620	77951	76808	76994	74078	90759	110369	92700	1.08605	0.0770633	0.148071
P98155	VLDLR	2709	2335	2227	3278	2968	3346	2635	4043	3690	1.42594	0.0770715	0.148071
Q12840	KIF5A	1557434	1501755	1663405	1639086	1450617	1489833	1445468	1390934	1353644	0.887234	0.0771187	0.148074
Q96NY7	CLIC6	39470	15648	26783	18954	6634	16039	12838	8106	7376	0.345783	0.0771513	0.148074
P21579	SYT1	415738	507808	417450	494115	568087	539996	509124	488502	499521	1.11644	0.0773546	0.14839
P84085	ARF5	15424	15248	15140	18773	16205	19642	16329	16357	18602	1.11953	0.0779263	0.149381
Q9HCJ6	VAT1L	2975132	2250356	3191387	2401703	2493470	2563475	1935940	1929563	2341587	0.737458	0.0779497	0.149381
Q8IV08	PLD3	249114	304332	261844	236075	214913	228548	251222	206640	188535	0.792843	0.0780288	0.14941
O15446	CD3EAP	52844	57573	53094	54330	57622	52131	56113	68129	64945	1.15703	0.0780435	0.14941
Q9BTE3	MCMBP	66098	76274	80311	72918	64684	76769	88702	84217	80841	1.13956	0.0781439	0.149527
Q15059	BRD3	31331	23953	25477	29091	29944	27915	34655	34881	30173	1.23462	0.0782628	0.149664
Q969M3	YIPF5	53713	57515	60570	57661	58809	56715	60019	62718	66359	1.10069	0.0782941	0.149664
P38606	ATP6V1A	4722186	5002496	4737296	4824822	5462803	5402355	5202635	5409690	5813506	1.13579	0.0783433	0.149666
Q8N465	D2HGDH	319717	271990	288587	330536	311992	307010	321105	334574	338951	1.12988	0.0784038	0.149666
O43687	AKAP7	28938	27334	20153	26569	32431	29927	30021	36159	37520	1.35689	0.0784135	0.149666
Q9H1B7	IRF2BPL	290783	302634	285267	278634	274097	256145	292489	284127	273807	0.967837	0.0785015	0.149716
Q9H307	PNN	173396	181594	149353	195345	203431	164303	204129	253114	202438	1.308	0.0785308	0.149716
Q9GZS3	WDR61	177106	157233	164660	167887	151589	154354	171161	177534	184238	1.068	0.0785575	0.149716
Q9Y263	PLAA	181337	179714	185293	183141	170596	163359	167653	170755	166541	0.924233	0.0787111	0.149933
Q8IXJ6	SIRT2	52110	54056	56207	59079	55609	57668	59796	64866	56976	1.11865	0.0788537	0.150121
P57737	CORO7	233394	216533	234227	263275	235636	254709	243017	239030	243117	1.05994	0.0788996	0.150121
Q07960	ARHGAP1	573836	553495	578533	625239	637762	622534	574479	580470	650479	1.05837	0.0789278	0.150121
[truncated: 1,802 more rows]

## Sheet: GO_SigUp
Category	Term	Count	%	PValue	Genes	List Total	Pop Hits	Pop Total	Fold Enrichment	Bonferroni	Benjamini	FDR
BIOCARTA	h_etcPathway:Electron Transport Reaction in Mitochondria	3	2.25564	0.00146573	UQCRC1, SLC25A4, SDHB	10	11	1623	44.2636	0.0274844	0.0278488	0.0278488
COG_ONTOLOGY	Lipid metabolism	5	3.7594	0.00210193	ACADVL, ACSL1, OXCT1, ECI2, HIBCH	18	69	2025	8.15217	0.0187591	0.0189174	0.0189174
GOTERM_BP_DIRECT	GO:0009060~aerobic respiration	12	9.02256	7.31516e-13	NDUFA9, NDUFA13, NDUFB8, NDUFS6, NDUFA3, NDUFA10, NDUFB3, NDUFA2, UQCRC1, NDUFS2, NDUFS1, SDHB	127	69	19416	26.5882	5.96925e-10	5.96917e-10	5.93991e-10
GOTERM_BP_DIRECT	GO:0042776~proton motive force-driven mitochondrial ATP synthesis	11	8.27068	1.22092e-11	NDUFA9, NDUFA13, NDUFB8, NDUFS6, NDUFA3, NDUFA10, NDUFB3, NDUFA2, NDUFS2, NDUFS1, SDHB	127	65	19416	25.8723	9.96273e-09	3.74073e-09	3.7224e-09
GOTERM_BP_DIRECT	GO:0006120~mitochondrial electron transport, NADH to ubiquinone	10	7.5188	1.37527e-11	NDUFA9, NDUFB8, NDUFS6, NDUFA4, NDUFA3, NDUFA10, NDUFB3, NDUFA2, NDUFS2, NDUFS1	127	46	19416	33.2352	1.12222e-08	3.74073e-09	3.7224e-09
GOTERM_BP_DIRECT	GO:1902600~proton transmembrane transport	14	10.5263	1.25317e-10	NDUFA9, NDUFB8, NDUFA4, NDUFA3, NDUFA10, NDUFB3, NDUFA2, NDUFS6, UQCRC1, NDUFS2, MT-CO2, NDUFS1, SLC25A5, SLC25A4	127	176	19416	12.1611	1.02259e-07	2.55647e-08	2.54394e-08
GOTERM_BP_DIRECT	GO:0032981~mitochondrial respiratory chain complex I assembly	9	6.76692	1.34116e-08	NDUFA9, NDUFA13, NDUFB8, NDUFA3, NDUFA10, NDUFB3, NDUFA2, NDUFS2, NDUFS1	127	68	19416	20.2344	1.09438e-05	2.18877e-06	2.17804e-06
GOTERM_BP_DIRECT	GO:0005975~carbohydrate metabolic process	11	8.27068	6.84927e-08	PYGB, GLB1, IDH3G, HEXB, HEXA, FUCA2, LANCL1, MAN2B1, GPD1L, SPATA20, GUSB	127	155	19416	10.8497	5.58885e-05	9.315e-06	9.26934e-06
GOTERM_BP_DIRECT	GO:0032543~mitochondrial translation	8	6.01504	2.62747e-06	MRPS17, MRPS9, MRPS35, MRPS14, MRPS11, MRPS2, CHCHD1, DAP3	127	94	19416	13.0112	0.00214172	0.000306287	0.000304786
GOTERM_BP_DIRECT	GO:0045333~cellular respiration	5	3.7594	0.00014218	NDUFA4, UQCRC1, MT-CO2, NDUFS1, COX6C	127	41	19416	18.6441	0.109549	0.0145023	0.0144312
GOTERM_BP_DIRECT	GO:0051597~response to methylmercury	3	2.25564	0.000412502	ARSA, FECH, ARSB	127	5	19416	91.7291	0.285857	0.0374002	0.0372169
GOTERM_CC_DIRECT	GO:0005739~mitochondrion	60	45.1128	1.37902e-29	MRPS17, NDUFA13, ACADVL, CLPB, TAMM41, MRPS14, TACO1, MRPS11, ECI2, NDUFA10, CISD1, OGDHL, SPATA20, ALDH1L2, GLS, GJA1, HMGN5, CHCHD1, HIBCH, MECR, ACSL1, DCXR, MRPS2, LMO7, SDHB, POU5F1, CLPX, VWA8, CYP27A1, AFG3L2, MRPS9, MBLAC2, PPA2, NDUFS6, UQCRC1, NDUFS2, MT-CO2, NDUFS1, PPIG, SLC25A5, SLC25A4, PI4K2A, DAP3, NDUFB8, FECH, MRPS35, NDUFB3, AK3, BPHL, PRDX3, OXCT1, NDUFA9, NDUFA4, IDH3G, NDUFA…	132	1711	20666	5.49014	2.62013e-27	2.62013e-27	2.44086e-27
GOTERM_CC_DIRECT	GO:0005743~mitochondrial inner membrane	31	23.3083	9.28967e-21	MRPS17, NDUFA13, ACADVL, NDUFB8, MRPS35, FECH, TAMM41, MRPS14, MRPS11, NDUFA10, NDUFB3, CHCHD1, NDUFA9, NDUFA4, NDUFA3, NDUFA2, MRPS2, COX6C, SDHB, CLPX, CYP27A1, AFG3L2, MRPS9, NDUFS6, UQCRC1, NDUFS2, MT-CO2, NDUFS1, SLC25A5, SLC25A4, DAP3	132	513	20666	9.46078	1.76504e-18	8.82518e-19	8.22135e-19
GOTERM_CC_DIRECT	GO:0005759~mitochondrial matrix	23	17.2932	6.99219e-14	NDUFA9, ACADVL, NDUFB8, MECR, FECH, IDH3G, NDUFA10, MRPS2, AK3, OGDHL, SUOX, ALDH1L2, SDHB, CLPX, GLS, PRDX3, CYP27A1, PPA2, OXCT1, NDUFS2, MT-CO2, NDUFS1, HIBCH	132	443	20666	8.12843	1.32894e-11	4.42839e-12	4.12539e-12
GOTERM_CC_DIRECT	GO:0043202~lysosomal lumen	13	9.77444	1.28983e-12	CTSA, ARSA, ASAH1, HEXB, HEXA, GALNS, GLB1, MAN2B2, LAMP2, PPT1, MAN2B1, GUSB, ARSB	132	98	20666	20.7682	2.45073e-10	6.12669e-11	5.7075e-11
GOTERM_CC_DIRECT	GO:0045271~respiratory chain complex I	10	7.5188	1.13062e-11	NDUFA9, NDUFA13, NDUFB8, NDUFS6, NDUFA3, NDUFA10, NDUFB3, NDUFA2, NDUFS2, NDUFS1	132	46	20666	34.0349	2.14819e-09	4.22699e-10	3.93777e-10
GOTERM_CC_DIRECT	GO:0035578~azurophil granule lumen	12	9.02256	1.33484e-11	CTSA, GALNS, ARSA, PYGB, DPP7, GLB1, HEXB, FUCA2, MAN2B1, GUSB, PRSS2, ARSB	132	91	20666	20.6454	2.5362e-09	4.22699e-10	3.93777e-10
GOTERM_CC_DIRECT	GO:0005764~lysosome	17	12.782	1.99479e-10	CTSA, ARSA, ASAH1, CPQ, HEXB, HEXA, FUCA2, PLA2G15, GALNS, GLB1, MAN2B2, LAMP2, PPT1, MAN2B1, VAMP4, GUSB, ARSB	132	319	20666	8.34336	3.79011e-08	5.41444e-09	5.04398e-09
GOTERM_CC_DIRECT	GO:0005763~mitochondrial small ribosomal subunit	8	6.01504	1.63224e-09	MRPS17, MRPS9, MRPS35, MRPS14, MRPS11, MRPS2, CHCHD1, DAP3	132	34	20666	36.8378	3.10125e-07	3.87656e-08	3.61133e-08
GOTERM_CC_DIRECT	GO:0031966~mitochondrial membrane	9	6.76692	1.30311e-05	NDUFA9, ACADVL, NDUFA13, NDUFA4, NDUFA2, MT-CO2, COX6C, SLC25A4, SDHB	132	170	20666	8.2885	0.00247285	0.0002751	0.000256277
GOTERM_CC_DIRECT	GO:0070062~extracellular exosome	32	24.0602	2.10927e-05	PYGB, ASAH1, CD81, CPQ, HEXB, HEXA, HTRA1, PYGM, PYGL, ALDH1L2, DOCK10, DPP7, LAMP2, GUSB, ARSB, CTSA, ARSA, DCXR, FUCA2, ABHD14B, ANO6, HSPA12A, GALNS, PLA2G15, MBLAC2, MAN2B2, GLB1, CDH11, PPT1, MAN2B1, GPD1L, ANP32B	132	2242	20666	2.23458	0.00399963	0.000400761	0.00037334
GOTERM_CC_DIRECT	GO:0000792~heterochromatin	5	3.7594	0.000261951	MECP2, PHC2, CBX3, ATRX, MBD2	132	49	20666	15.9756	0.0485587	0.00452461	0.00421503
GOTERM_CC_DIRECT	GO:0043231~intracellular membrane-bounded organelle	15	11.2782	0.00220594	CTSA, CALCOCO1, CPQ, HEXA, ECI2, ICA1, PLA2G15, PRDX3, GJA1, DPP7, GLB1, LAMP2, PPT1, MAN2B1, GUSB	132	924	20666	2.54157	0.342685	0.0349275	0.0325377
GOTERM_MF_DIRECT	GO:0008137~NADH dehydrogenase (ubiquinone) activity	10	7.5188	9.74464e-12	NDUFA9, NDUFB8, NDUFS6, NDUFA4, NDUFA3, NDUFA10, NDUFB3, NDUFA2, NDUFS2, NDUFS1	130	43	19208	34.3614	3.07931e-09	3.07931e-09	3.00135e-09
GOTERM_MF_DIRECT	GO:0019904~protein domain specific binding	9	6.76692	0.000113836	TJP1, MECP2, CBX3, LAMP2, MBD2, ICA1, M6PR, GUSB, TJP2	130	218	19208	6.09993	0.035335	0.0105606	0.0102932
GOTERM_MF_DIRECT	GO:0008184~glycogen phosphorylase activity	3	2.25564	0.000133678	PYGB, PYGM, PYGL	130	3	19208	147.754	0.0413652	0.0105606	0.0102932
GOTERM_MF_DIRECT	GO:0031220~maltodextrin phosphorylase activity	3	2.25564	0.000133678	PYGB, PYGM, PYGL	130	3	19208	147.754	0.0413652	0.0105606	0.0102932
INTERPRO	IPR035090:Pyridoxal_P_attach_site	3	2.25564	0.00012095	PYGB, PYGM, PYGL	133	3	20667	155.391	0.0645884	0.0222549	0.0221742
INTERPRO	IPR000811:Glyco_trans_35	3	2.25564	0.00012095	PYGB, PYGM, PYGL	133	3	20667	155.391	0.0645884	0.0222549	0.0221742
INTERPRO	IPR011833:Glycg_phsphrylas	3	2.25564	0.00012095	PYGB, PYGM, PYGL	133	3	20667	155.391	0.0645884	0.0222549	0.0221742
KEGG_PATHWAY	hsa00190:Oxidative phosphorylation	16	12.0301	4.26954e-12	NDUFA9, NDUFA13, NDUFB8, NDUFA4, NDUFA3, NDUFA10, NDUFB3, NDUFA2, COX6C, SDHB, PPA2, NDUFS6, UQCRC1, NDUFS2, MT-CO2, NDUFS1	89	138	8865	11.5486	5.93472e-10	5.93466e-10	5.29423e-10
KEGG_PATHWAY	hsa04142:Lysosome	15	11.2782	3.31188e-11	CTSA, ARSA, ASAH1, HEXB, HEXA, FUCA2, M6PR, PLA2G15, GALNS, GLB1, LAMP2, PPT1, MAN2B1, GUSB, ARSB	89	132	8865	11.3189	4.60352e-09	2.30176e-09	2.05337e-09
KEGG_PATHWAY	hsa01100:Metabolic pathways	43	32.3308	7.11036e-11	PYGB, NDUFA13, ACADVL, NDUFB8, ASAH1, FECH, HEXB, PDE1A, HEXA, NDUFA10, NDUFB3, OGDHL, PYGM, PYGL, ALDH1L2, GLS, OXCT1, GUSB, ARSB, HIBCH, NDUFA9, ARSA, MECR, ACSL1, NDUFA4, IDH3G, NDUFA3, DCXR, LANCL1, NDUFA2, COX6C, SUOX, SDHB, GALNS, CYP27A1, GLB1, NDUFS6, UQCRC1, PPT1, NDUFS2, MT-CO2, NDUFS1, PI4K2A	89	1564	8865	2.73855	9.88341e-09	3.29447e-09	2.93895e-09
KEGG_PATHWAY	hsa05415:Diabetic cardiomyopathy	17	12.782	1.24509e-10	NDUFA9, NDUFA13, NDUFB8, NDUFA4, NDUFA3, NDUFA10, NDUFB3, NDUFA2, COX6C, SDHB, NDUFS6, UQCRC1, NDUFS2, MT-CO2, NDUFS1, SLC25A5, SLC25A4	89	205	8865	8.26007	1.73068e-08	4.32669e-09	3.85978e-09
KEGG_PATHWAY	hsa04932:Non-alcoholic fatty liver disease	15	11.2782	3.46508e-10	NDUFA9, NDUFA13, NDUFB8, NDUFA4, NDUFA3, NDUFA10, NDUFB3, NDUFA2, COX6C, SDHB, NDUFS6, UQCRC1, NDUFS2, MT-CO2, NDUFS1	89	157	8865	9.51657	4.81646e-08	9.63291e-09	8.59339e-09
KEGG_PATHWAY	hsa05208:Chemical carcinogenesis - reactive oxygen species	17	12.782	5.68646e-10	NDUFA9, NDUFA13, NDUFB8, NDUFA4, NDUFA3, NDUFA10, NDUFB3, NDUFA2, COX6C, SDHB, NDUFS6, UQCRC1, NDUFS2, MT-CO2, NDUFS1, SLC25A5, SLC25A4	89	227	8865	7.45954	7.90418e-08	1.31736e-08	1.1752e-08
KEGG_PATHWAY	hsa05012:Parkinson disease	17	12.782	7.50384e-09	NDUFA9, NDUFA13, NDUFB8, NDUFA4, NDUFA3, NDUFA10, NDUFB3, NDUFA2, COX6C, SDHB, NDUFS6, UQCRC1, NDUFS2, MT-CO2, NDUFS1, SLC25A5, SLC25A4	89	271	8865	6.24839	1.04303e-06	1.41733e-07	1.26438e-07
KEGG_PATHWAY	hsa04714:Thermogenesis	16	12.0301	8.15727e-09	NDUFA9, NDUFA13, NDUFB8, ACSL1, NDUFA4, NDUFA3, NDUFA10, NDUFB3, NDUFA2, COX6C, SDHB, NDUFS6, UQCRC1, NDUFS2, MT-CO2, NDUFS1	89	235	8865	6.78174	1.13386e-06	1.41733e-07	1.26438e-07
KEGG_PATHWAY	hsa05020:Prion disease	17	12.782	1.08065e-08	NDUFA9, NDUFA13, NDUFB8, NDUFA4, NDUFA3, NDUFA10, NDUFB3, NDUFA2, COX6C, SDHB, NDUFS6, UQCRC1, NDUFS2, MT-CO2, NDUFS1, SLC25A5, SLC25A4	89	278	8865	6.09106	1.5021e-06	1.669e-07	1.48889e-07
KEGG_PATHWAY	hsa05016:Huntington disease	17	12.782	5.26266e-08	NDUFA9, NDUFA13, NDUFB8, NDUFA4, NDUFA3, NDUFA10, NDUFB3, NDUFA2, COX6C, SDHB, NDUFS6, UQCRC1, NDUFS2, MT-CO2, NDUFS1, SLC25A5, SLC25A4	89	311	8865	5.44474	7.31508e-06	7.3151e-07	6.5257e-07
KEGG_PATHWAY	hsa00511:Other glycan degradation	6	4.51128	6.65214e-07	GLB1, MAN2B2, HEXB, HEXA, FUCA2, MAN2B1	89	18	8865	33.2022	9.24605e-05	8.40588e-06	7.49877e-06
KEGG_PATHWAY	hsa00531:Glycosaminoglycan degradation	6	4.51128	8.95754e-07	GALNS, GLB1, HEXB, HEXA, GUSB, ARSB	89	19	8865	31.4548	0.000124502	1.03758e-05	9.25613e-06
KEGG_PATHWAY	hsa05010:Alzheimer disease	17	12.782	1.18375e-06	NDUFA9, NDUFA13, NDUFB8, NDUFA4, NDUFA3, NDUFA10, NDUFB3, NDUFA2, COX6C, SDHB, NDUFS6, UQCRC1, NDUFS2, MT-CO2, NDUFS1, SLC25A5, SLC25A4	89	391	8865	4.33073	0.000164528	1.2657e-05	1.12912e-05
KEGG_PATHWAY	hsa04723:Retrograde endocannabinoid signaling	11	8.27068	1.95592e-06	NDUFA9, NDUFA13, NDUFB8, NDUFS6, NDUFA4, NDUFA3, NDUFA10, NDUFB3, NDUFA2, NDUFS2, NDUFS1	89	149	8865	7.35352	0.000271836	1.94195e-05	1.73239e-05
KEGG_PATHWAY	hsa05014:Amyotrophic lateral sclerosis	15	11.2782	1.51244e-05	NDUFA9, NDUFA13, NDUFB8, NDUFA4, NDUFA3, NDUFA10, NDUFB3, NDUFA2, COX6C, SDHB, NDUFS6, UQCRC1, NDUFS2, MT-CO2, NDUFS1	89	371	8865	4.02723	0.0021001	0.000140153	0.000125029
KEGG_PATHWAY	hsa05022:Pathways of neurodegeneration - multiple diseases	17	12.782	1.78111e-05	NDUFA9, NDUFA13, NDUFB8, NDUFA4, NDUFA3, NDUFA10, NDUFB3, NDUFA2, COX6C, SDHB, NDUFS6, UQCRC1, NDUFS2, MT-CO2, NDUFS1, SLC25A5, SLC25A4	89	483	8865	3.50583	0.0024727	0.000154734	0.000138036
KEGG_PATHWAY	hsa00600:Sphingolipid metabolism	5	3.7594	0.00196417	ARSA, ASAH1, GLB1, HEXB, HEXA	89	54	8865	9.22285	0.239126	0.01606	0.0143269
PIR_SUPERFAMILY	PIRSF000460:Pprylas_GlgP	3	2.25564	0.000301181	PYGB, PYGM, PYGL	21	3	1940	92.381	0.0054074	0.00542126	0.00542126
UP_KW_BIOLOGICAL_PROCESS	KW-0679~Respiratory chain	13	9.77444	1.13652e-14	NDUFA9, NDUFA13, NDUFB8, NDUFA4, NDUFA3, NDUFA10, NDUFB3, NDUFA2, NDUFS6, UQCRC1, NDUFS2, MT-CO2, NDUFS1	76	67	11434	29.1913	6.22835e-13	6.25086e-13	5.79625e-13
UP_KW_BIOLOGICAL_PROCESS	KW-0249~Electron transport	14	10.5263	2.86034e-13	NDUFA9, NDUFA13, NDUFB8, NDUFA4, NDUFA3, NDUFA10, NDUFB3, NDUFA2, SDHB, NDUFS6, UQCRC1, NDUFS2, MT-CO2, NDUFS1	76	112	11434	18.8059	1.57296e-11	7.86594e-12	7.29388e-12
UP_KW_BIOLOGICAL_PROCESS	KW-0443~Lipid metabolism	14	10.5263	0.00119881	ARSA, ACADVL, ASAH1, MECR, TAMM41, ACSL1, HEXB, HEXA, PLA2G15, CYP27A1, MBLAC2, OXCT1, RDH14, PI4K2A	76	759	11434	2.77505	0.0638451	0.0219783	0.0203798
UP_KW_BIOLOGICAL_PROCESS	KW-0222~Digestion	3	2.25564	0.00268528	PRSS1, PRSS3, PRSS2	76	12	11434	37.6118	0.137473	0.0369227	0.0342374
UP_KW_CELLULAR_COMPONENT	KW-0496~Mitochondrion	51	38.3459	4.07313e-24	MRPS17, NDUFA13, ACADVL, CLPB, TAMM41, MRPS14, TACO1, MRPS11, ECI2, NDUFA10, CISD1, OGDHL, ALDH1L2, GLS, CHCHD1, HIBCH, MECR, ACSL1, MRPS2, SDHB, CLPX, VWA8, CYP27A1, AFG3L2, MRPS9, PPA2, NDUFS6, UQCRC1, NDUFS2, MT-CO2, NDUFS1, SLC25A5, SLC25A4, PI4K2A, DAP3, NDUFB8, FECH, MRPS35, NDUFB3, AK3, PRDX3, OXCT1, NDUFA9, NDUFA4, IDH3G, NDUFA3, NDUFA2, SYNJ2BP, SUOX, COX6C, ARMC10	125	1378	17932	5.30933	1.01828e-22	1.01828e-22	1.01828e-22
UP_KW_CELLULAR_COMPONENT	KW-0999~Mitochondrion inner membrane	20	15.0376	4.19131e-12	ACADVL, NDUFA13, NDUFB8, FECH, TAMM41, NDUFA4, NDUFA3, NDUFB3, NDUFA2, COX6C, SDHB, CYP27A1, AFG3L2, NDUFS6, UQCRC1, NDUFS2, MT-CO2, NDUFS1, SLC25A5, SLC25A4	125	353	17932	8.12782	1.04783e-10	5.23914e-11	5.23914e-11
UP_KW_CELLULAR_COMPONENT	KW-0458~Lysosome	16	12.0301	2.62467e-07	CTSA, ARSA, ASAH1, CPQ, HEXB, HEXA, M6PR, PLA2G15, GALNS, DPP7, GLB1, LAMP2, PPT1, MAN2B1, GUSB, ARSB	125	427	17932	5.3754	6.56166e-06	2.18723e-06	2.18723e-06
UP_KW_DISEASE	KW-1274~Primary mitochondrial disease	17	12.782	1.96603e-09	NDUFA9, NDUFA13, NDUFB8, TAMM41, NDUFA4, MRPS14, TACO1, NDUFA10, NDUFB3, NDUFA2, MRPS2, SDHB, NDUFS6, NDUFS2, MT-CO2, NDUFS1, SLC25A4	61	206	4820	6.52077	6.68451e-08	6.68451e-08	6.48791e-08
UP_KW_DISEASE	KW-0510~Mucopolysaccharidosis	4	3.00752	0.000605576	GALNS, GLB1, GUSB, ARSB	61	14	4820	22.5761	0.0203852	0.0102948	0.00999201
UP_KW_DISEASE	KW-0331~Gangliosidosis	3	2.25564	0.00148768	GLB1, HEXB, HEXA	61	5	4820	47.4098	0.049359	0.0168604	0.0163645
UP_KW_DOMAIN	KW-0809~Transit peptide	31	23.3083	2.63948e-18	MRPS17, ACADVL, NDUFB8, MRPS35, CLPB, FECH, MRPS11, ECI2, NDUFA10, OGDHL, ALDH1L2, GLS, PRDX3, OXCT1, HIBCH, NDUFA9, MECR, IDH3G, SUOX, SDHB, CLPX, VWA8, CYP27A1, AFG3L2, MRPS9, PPA2, NDUFS6, UQCRC1, NDUFS2, NDUFS1, DAP3	104	582	14566	7.46012	4.48711e-17	4.48711e-17	4.48711e-17
UP_KW_LIGAND	KW-0830~Ubiquinone	7	5.26316	5.29755e-07	NDUFA9, NDUFA13, NDUFS6, NDUFA3, NDUFA10, NDUFS2, NDUFS1	65	34	6946	22.0009	1.53628e-05	1.53629e-05	1.48331e-05
UP_KW_LIGAND	KW-0001~2Fe-2S	4	3.00752	0.000881479	FECH, CISD1, NDUFS1, SDHB	65	21	6946	20.3546	0.0252499	0.0127814	0.0123407
UP_KW_LIGAND	KW-0411~Iron-sulfur	5	3.7594	0.00443467	FECH, CISD1, NDUFS2, NDUFS1, SDHB	65	73	6946	7.31928	0.120931	0.0428685	0.0413902
UP_KW_MOLECULAR_FUNCTION	KW-0378~Hydrolase	34	25.5639	3.19734e-06	PRSS1, ASAH1, CLPB, CPQ, HEXB, PDE1A, HEXA, HTRA1, PTPRM, BPHL, GLS, DPP7, PRSS3, GUSB, PRSS2, ARSB, HIBCH, CTSA, ARSA, FUCA2, ATRX, ABHD14B, PRSS12, GALNS, PLA2G15, AFG3L2, RAP2A, MBLAC2, PPA2, MAN2B2, GLB1, PPT1, MAN2B1, METAP2	97	1827	11859	2.27518	0.000140673	0.000140683	0.000127894
UP_KW_MOLECULAR_FUNCTION	KW-0326~Glycosidase	7	5.26316	6.28206e-05	GLB1, MAN2B2, HEXB, HEXA, FUCA2, MAN2B1, GUSB	97	85	11859	10.0683	0.00276038	0.00138205	0.00125641
UP_KW_MOLECULAR_FUNCTION	KW-0689~Ribosomal protein	8	6.01504	0.00104318	MRPS17, MRPS9, MRPS35, MRPS14, MRPS11, MRPS2, CHCHD1, DAP3	97	196	11859	4.99011	0.0448854	0.0153	0.0139091
UP_KW_MOLECULAR_FUNCTION	KW-0687~Ribonucleoprotein	9	6.76692	0.00396747	MRPS17, MRPS9, MRPS35, MRPS14, MRPS11, GAR1, MRPS2, CHCHD1, DAP3	97	315	11859	3.49308	0.160472	0.0378328	0.0343935
UP_KW_MOLECULAR_FUNCTION	KW-0560~Oxidoreductase	13	9.77444	0.00429918	ACADVL, MECR, DCXR, OGDHL, SUOX, ALDH1L2, SDHB, PRDX3, CYP27A1, NDUFS2, RDH14, NDUFS1, GPD1L	97	622	11859	2.55523	0.172687	0.0378328	0.0343935
UP_KW_MOLECULAR_FUNCTION	KW-0720~Serine protease	6	4.51128	0.00658458	PRSS1, DPP7, HTRA1, PRSS3, PRSS12, PRSS2	97	146	11859	5.02429	0.252245	0.0482869	0.0438972
UP_KW_PTM	KW-0007~Acetylation	50	37.594	6.48107e-06	PYGB, NDUFA13, ACADVL, CLPB, ECI2, CISD1, PYGM, PYGL, ALDH1L2, FAM107B, GLS, DOCK10, MECP2, GJA1, HIBCH, MECR, ACSL1, DCXR, ATRX, LANCL1, ABHD14B, LMO7, SDHB, CLPX, CYP27A1, MRPS9, MBLAC2, PPA2, NDUFS6, UQCRC1, NDUFS2, NDUFS1, SLC25A5, SLC25A4, PI4K2A, DAP3, FECH, NDUFB3, AK3, BPHL, PRDX3, NDUFA9, CBX3, NDUFA4, NDUFA3, NDUFA2, HSPA12A, PDCD4, ANP32B, METAP2	113	3505	14268	1.80122	0.000103692	0.000110178	0.000110178
UP_KW_PTM	KW-0865~Zymogen	10	7.5188	6.45432e-05	CTSA, PRSS1, DPP7, GLB1, CPQ, HEXB, HEXA, MAN2B1, PRSS3, PRSS2	113	223	14268	5.66213	0.00103219	0.000548617	0.000548617
UP_SEQ_FEATURE	TRANSIT:Mitochondrion	30	22.5564	1.31689e-18	MRPS17, ACADVL, NDUFB8, MRPS35, CLPB, FECH, MRPS11, ECI2, NDUFA10, OGDHL, GLS, PRDX3, OXCT1, HIBCH, NDUFA9, MECR, IDH3G, SUOX, SDHB, CLPX, VWA8, CYP27A1, AFG3L2, MRPS9, PPA2, NDUFS6, UQCRC1, NDUFS2, NDUFS1, DAP3	131	562	20502	8.3543	7.73012e-16	7.73012e-16	7.66428e-16
UP_SEQ_FEATURE	ACT_SITE:Charge relay system	9	6.76692	5.71832e-05	PLA2G15, PRSS1, DPP7, HTRA1, ABHD14B, PRSS3, PRSS12, PRSS2, BPHL	131	209	20502	6.7394	0.0330104	0.0167833	0.0166403
UP_SEQ_FEATURE	SITE:May be involved in allosteric control	3	2.25564	0.000119199	PYGB, PYGM, PYGL	131	3	20502	156.504	0.0675818	0.0174924	0.0173434
UP_SEQ_FEATURE	SITE:Involved in the association of subunits	3	2.25564	0.000119199	PYGB, PYGM, PYGL	131	3	20502	156.504	0.0675818	0.0174924	0.0173434
UP_SEQ_FEATURE	SITE:Required for specificity	3	2.25564	0.000237406	PRSS1, PRSS3, PRSS2	131	4	20502	117.378	0.130097	0.0278714	0.027634
UP_SEQ_FEATURE	TOPO_DOM:Mitochondrial intermembrane	7	5.26316	0.000327645	AFG3L2, NDUFA4, MT-CO2, COX6C, SLC25A5, SYNJ2BP, SLC25A4	131	145	20502	7.55536	0.174989	0.0320546	0.0317815
UP_SEQ_FEATURE	TOPO_DOM:Mitochondrial matrix	6	4.51128	0.000441315	AFG3L2, NDUFA4, MT-CO2, COX6C, SLC25A5, SLC25A4	131	100	20502	9.39023	0.228261	0.0370075	0.0366922

## Sheet: GO_SigDn
Category	Term	Count	%	PValue	Genes	List Total	Pop Hits	Pop Total	Fold Enrichment	Bonferroni	Benjamini	FDR
COG_ONTOLOGY	Cytoskeleton	3	3.94737	0.00454203	CNN2, TAGLN2, CNN3	8	31	2025	24.496	0.0269446	0.0272522	0.0272522
GOTERM_BP_DIRECT	GO:0030036~actin cytoskeleton organization	9	11.8421	2.74287e-06	PDLIM3, CSRP2, ANXA1, PALLD, FLNA, FLNC, PDLIM5, EZR, PDLIM7	76	228	19416	10.0845	0.00231778	0.00232047	0.00231224
GOTERM_BP_DIRECT	GO:0098609~cell-cell adhesion	7	9.21053	0.000130527	LGALS1, ANXA1, ANXA2, TTYH1, PDLIM5, CNN3, ICAM1	76	202	19416	8.85305	0.104554	0.0462423	0.0460783
GOTERM_BP_DIRECT	GO:0045109~intermediate filament organization	5	6.57895	0.000192551	DES, VIM, PLEC, GFAP, PRPH	76	74	19416	17.2617	0.150336	0.0462423	0.0460783
GOTERM_BP_DIRECT	GO:0006564~L-serine biosynthetic process	3	3.94737	0.00021864	PSAT1, PHGDH, PSPH	76	6	19416	127.737	0.168887	0.0462423	0.0460783
GOTERM_CC_DIRECT	GO:0070062~extracellular exosome	37	48.6842	6.88236e-16	DDR1, CLIC4, CRABP2, DPYS, MVP, SLC2A1, HSPB1, SLC1A5, IQGAP1, ACAT2, SYNE2, ICAM1, LGALS1, COTL1, FLNA, PHGDH, CKB, CRYM, MEST, CLIC1, PRPH, G6PD, ANXA1, ANXA2, MYOF, ASS1, EHD2, MARCKS, DES, PSAT1, COL6A1, TAGLN2, TGFBI, VIM, EZR, CRYAB, PLEC	76	2242	20666	4.48755	1.51879e-13	8.27269e-14	7.32931e-14
GOTERM_CC_DIRECT	GO:0005925~focal adhesion	20	26.3158	7.25674e-16	ANXA1, CAV1, TNC, HSPB1, IQGAP1, SYNE2, CNN3, ICAM1, MRC2, CNN2, MARCKS, CSRP2, PALLD, ZYX, FLNA, VIM, FLNC, EZR, PDLIM7, PLEC	76	431	20666	12.6181	1.77192e-13	8.27269e-14	7.32931e-14
GOTERM_CC_DIRECT	GO:0030018~Z disc	14	18.4211	2.21764e-15	SLC2A1, HSPB1, SYNE2, PDLIM3, DES, CSRP2, PALLD, FLNA, FLNC, SYNPO, PDLIM5, CRYAB, PDLIM7, PLEC	76	136	20666	27.9919	5.06262e-13	1.68541e-13	1.49321e-13
GOTERM_CC_DIRECT	GO:0005829~cytosol	49	64.4737	2.11039e-11	CLIC4, HIP1, DPYS, SLC2A1, CLTA, HSPB1, CROT, LGALS1, PEA15, COTL1, PHGDH, SYNPO, PSPH, G6PD, ANXA1, ANXA2, HMGCS1, PALLD, CDC42EP4, TAGLN2, EZR, CRYAB, PLEC, YAP1, ISYNA1, CRABP2, MVP, IQGAP1, ACAT2, TYMP, CNN3, PDLIM3, IGF2BP1, FLNA, CKB, FLNC, CRYM, PDLIM5, PDLIM7, ASNS, DOHH, ASS1, GFAP, EHD2, DES, PSAT1, ZYX, VIM, ADA	76	5576	20666	2.38955	4.81169e-09	9.79515e-10	8.67816e-10
GOTERM_CC_DIRECT	GO:0015629~actin cytoskeleton	14	18.4211	2.14806e-11	CLIC4, IQGAP1, CNN3, CNN2, MARCKS, PALLD, CDC42EP4, ZYX, FLNA, TAGLN2, EZR, SYNPO, PDLIM5, PDLIM7	76	278	20666	13.6939	4.89758e-09	9.79515e-10	8.67816e-10
GOTERM_CC_DIRECT	GO:0042383~sarcolemma	8	10.5263	1.29614e-07	DES, ANXA1, ANXA2, CAV1, COL6A1, SLC2A1, FLNC, PLEC	76	108	20666	20.1423	2.95516e-05	4.92535e-06	4.36368e-06
GOTERM_CC_DIRECT	GO:0005737~cytoplasm	44	57.8947	1.60067e-07	YAP1, CLIC4, ISYNA1, HIP1, SPARC, CRABP2, MVP, HSPB1, MSI1, IQGAP1, ACAT2, SYNE2, LGALS1, CSRP2, PEA15, IGF2BP1, FLNA, FLNC, CRYM, PDLIM5, NEFH, CLIC1, PSPH, PRPH, G6PD, ANXA1, DYNLT1, HMGCS1, ANXA2, DLK1, ASS1, GFAP, EHD2, MARCKS, DES, PSAT1, CDC42EP4, EEF1A2, ZYX, VIM, EZR, CRYAB, NES, PLEC	76	5887	20666	2.03236	3.64946e-05	5.2136e-06	4.61907e-06
GOTERM_CC_DIRECT	GO:0005912~adherens junction	9	11.8421	3.73424e-07	PDLIM3, ANXA1, ANXA2, CDC42EP4, ZYX, PDLIM5, EZR, PDLIM7, CNN3	76	186	20666	13.1575	8.51371e-05	1.06426e-05	9.42896e-06
GOTERM_CC_DIRECT	GO:0001725~stress fiber	7	9.21053	7.45735e-07	CNN2, PDLIM3, PALLD, ZYX, SYNPO, PDLIM5, PDLIM7	76	87	20666	21.8787	0.000170013	1.8892e-05	1.67376e-05
GOTERM_CC_DIRECT	GO:0045111~intermediate filament cytoskeleton	6	7.89474	1.25106e-06	DES, VIM, NES, SYNE2, PLEC, GFAP	76	52	20666	31.3755	0.0002852	2.85241e-05	2.52713e-05
GOTERM_CC_DIRECT	GO:0005884~actin filament	6	7.89474	3.82323e-05	ANXA1, PALLD, COTL1, FLNA, IQGAP1, EZR	76	104	20666	15.6878	0.00867924	0.000762932	0.000675931
GOTERM_CC_DIRECT	GO:0005856~cytoskeleton	11	14.4737	4.01543e-05	CNN2, HIP1, MVP, CDC42EP4, ZYX, HSPB1, VIM, FLNC, EZR, NEFH, SYNE2	76	572	20666	5.22925	0.00911359	0.000762932	0.000675931
GOTERM_CC_DIRECT	GO:0062023~collagen-containing extracellular matrix	9	11.8421	8.53409e-05	LGALS1, SPARC, ANXA1, ANXA2, COL6A1, SERPINH1, TNC, TGFBI, ICAM1	76	391	20666	6.25905	0.0192705	0.00149675	0.00132607
GOTERM_CC_DIRECT	GO:0005882~intermediate filament	6	7.89474	0.000151483	DES, VIM, NES, PLEC, GFAP, PRPH	76	139	20666	11.7376	0.033951	0.00246701	0.00218568
GOTERM_CC_DIRECT	GO:0005604~basement membrane	5	6.57895	0.000464067	SPARC, ANXA2, COL6A1, TNC, TGFBI	76	99	20666	13.7334	0.100424	0.00705381	0.00624943
GOTERM_CC_DIRECT	GO:0032432~actin filament bundle	3	3.94737	0.000837754	MARCKS, FLNA, CRYAB	76	12	20666	67.9803	0.17394	0.011938	0.0105766
GOTERM_CC_DIRECT	GO:0005903~brush border	4	5.26316	0.00122738	FLNA, EZR, CLIC1, PLEC	76	58	20666	18.7532	0.244227	0.0164613	0.0145841
GOTERM_CC_DIRECT	GO:0030864~cortical actin cytoskeleton	4	5.26316	0.00163168	HIP1, SLC2A1, COTL1, IQGAP1	76	64	20666	16.9951	0.310871	0.020668	0.0183111
GOTERM_CC_DIRECT	GO:0005886~plasma membrane	33	43.4211	0.00208912	DDR1, YAP1, CLIC4, SPARC, TTYH1, GLDC, SLC2A1, CLTA, SLC1A5, IQGAP1, ICAM1, LGALS1, FLNA, CKB, FLNC, SYNPO, CLIC1, PRPH, ANXA1, ANXA2, CAV1, MYOF, EHD2, MARCKS, PALLD, CDC42EP4, ZYX, TGFBI, VIM, EZR, SDK2, ADA, PLEC	76	5534	20666	1.6215	0.379244	0.0243377	0.0215623
GOTERM_CC_DIRECT	GO:0030424~axon	7	9.21053	0.00213488	PALLD, VIM, IQGAP1, CRYAB, NEFH, PLEC, PRPH	76	366	20666	5.20068	0.385701	0.0243377	0.0215623
GOTERM_CC_DIRECT	GO:0005901~caveola	4	5.26316	0.00257012	EHD2, CAV1, MYOF, SLC2A1	76	75	20666	14.5025	0.443864	0.0279042	0.0247221
GOTERM_CC_DIRECT	GO:0043204~perikaryon	5	6.57895	0.00280738	FLNA, SYNPO, CRYAB, ASS1, PRPH	76	161	20666	8.44475	0.473226	0.0290947	0.0257769
GOTERM_CC_DIRECT	GO:0016323~basolateral plasma membrane	6	7.89474	0.00300702	ANXA1, ANXA2, CAV1, SLC2A1, IQGAP1, EZR	76	270	20666	6.04269	0.496732	0.0298087	0.0264095
GOTERM_CC_DIRECT	GO:0031982~vesicle	5	6.57895	0.00320166	ANXA1, ANXA2, TAGLN2, EZR, CLIC1	76	167	20666	8.14135	0.518644	0.0304157	0.0269473
GOTERM_CC_DIRECT	GO:0005911~cell-cell junction	5	6.57895	0.00544636	CNN2, YAP1, CLIC4, DES, FLNA	76	194	20666	7.00827	0.712106	0.0492017	0.043591
GOTERM_CC_DIRECT	GO:0001726~ruffle	4	5.26316	0.00561072	PALLD, IQGAP1, EZR, PDLIM7	76	99	20666	10.9867	0.722753	0.0492017	0.043591
GOTERM_MF_DIRECT	GO:0051015~actin filament binding	11	14.4737	1.69801e-08	CNN2, MARCKS, HIP1, COTL1, FLNA, TAGLN2, IQGAP1, FLNC, EZR, CNN3, PLEC	76	225	19208	12.356	3.87145e-06	3.87146e-06	3.70166e-06
GOTERM_MF_DIRECT	GO:0003779~actin binding	11	14.4737	6.91365e-07	CNN2, PDLIM3, PALLD, COTL1, SYNPO, PDLIM5, EZR, SYNE2, PDLIM7, CNN3, PLEC	76	335	19208	8.29882	0.000157619	7.88156e-05	7.53588e-05
GOTERM_MF_DIRECT	GO:0005515~protein binding	71	93.4211	1.82186e-06	DDR1, CLIC4, HIP1, SPARC, DPYS, TNC, SLC2A1, CLTA, HSPB1, MSI1, CROT, SYNE2, ICAM1, MRC2, CSRP2, LGALS1, PEA15, COTL1, PHGDH, SYNPO, NEFH, CLIC1, G6PD, ANXA1, ANXA2, DYNLT1, HMGCS1, MYOF, PALLD, CDC42EP4, COL6A1, EEF1A2, TAGLN2, EZR, CRYAB, PLEC, YAP1, ISYNA1, CRABP2, TTYH1, MVP, SLC1A5, IQGAP1, ACAT2, TYMP, PDLIM3, IGF2BP1, SERPINH1, FLNA, CKB, FLNC, CRYM, PDLIM5, MEST, PDLIM7, PRPH, CAV1, ASNS,…	76	13670	19208	1.31268	0.000415298	0.000138461	0.000132389
GOTERM_MF_DIRECT	GO:0042802~identical protein binding	22	28.9474	2.71227e-06	G6PD, ANXA2, DYNLT1, MVP, DPYS, CAV1, SLC2A1, HSPB1, MSI1, ASS1, GFAP, EHD2, MARCKS, DES, PSAT1, TGFBI, VIM, FLNC, EZR, CRYAB, PSPH, PLEC	76	1777	19208	3.12899	0.000618206	0.000154599	0.000147819
GOTERM_MF_DIRECT	GO:0005200~structural constituent of cytoskeleton	7	9.21053	4.49116e-06	HIP1, DES, VIM, NEFH, PLEC, GFAP, PRPH	76	110	19208	16.0833	0.00102346	0.000204797	0.000195814
GOTERM_MF_DIRECT	GO:0005518~collagen binding	6	7.89474	7.87324e-06	DDR1, MRC2, SPARC, COL6A1, SERPINH1, TGFBI	76	70	19208	21.6632	0.0017935	0.000299183	0.000286061
GOTERM_MF_DIRECT	GO:0051371~muscle alpha-actinin binding	4	5.26316	2.51528e-05	PDLIM3, PALLD, PDLIM5, PDLIM7	76	15	19208	67.3965	0.0057185	0.000819262	0.00078333
GOTERM_MF_DIRECT	GO:0098641~cadherin binding involved in cell-cell adhesion	4	5.26316	4.47305e-05	ANXA1, ANXA2, PDLIM5, CNN3	76	18	19208	56.1637	0.0101469	0.00127482	0.00121891
GOTERM_MF_DIRECT	GO:0042803~protein homodimerization activity	11	14.4737	0.000668608	G6PD, HIP1, HMGCS1, GLDC, HSPB1, FLNA, MSI1, CRYM, CRYAB, PSPH, TYMP	76	753	19208	3.69204	0.141436	0.0169381	0.0161952
GOTERM_MF_DIRECT	GO:0005080~protein kinase C binding	4	5.26316	0.00110135	MARCKS, HSPB1, FLNA, PDLIM5	76	52	19208	19.4413	0.222168	0.0251107	0.0240093
GOTERM_MF_DIRECT	GO:0044548~S100 protein binding	3	3.94737	0.00132798	ANXA2, IQGAP1, EZR	76	14	19208	54.1579	0.261386	0.0275253	0.0263181
GOTERM_MF_DIRECT	GO:0045296~cadherin binding	7	9.21053	0.00159087	CNN2, FLNA, TAGLN2, IQGAP1, EZR, CLIC1, PLEC	76	321	19208	5.5114	0.304419	0.0291586	0.0278797
GOTERM_MF_DIRECT	GO:0005198~structural molecule activity	6	7.89474	0.00166255	CLTA, VIM, CRYAB, NES, GFAP, PRPH	76	219	19208	6.9243	0.315712	0.0291586	0.0278797
INTERPRO	IPR001715:CH_dom	8	10.5263	1.74666e-08	CNN2, FLNA, TAGLN2, IQGAP1, FLNC, SYNE2, CNN3, PLEC	76	81	20667	26.8577	5.92115e-06	3.51472e-06	3.44214e-06
INTERPRO	IPR036872:CH_dom_sf	8	10.5263	2.07358e-08	CNN2, FLNA, TAGLN2, IQGAP1, FLNC, SYNE2, CNN3, PLEC	76	83	20667	26.2105	7.02941e-06	3.51472e-06	3.44214e-06
INTERPRO	IPR006821:Intermed_filament_DNA-bd	4	5.26316	1.5899e-06	DES, VIM, GFAP, PRPH	76	7	20667	155.391	0.000538831	0.000134744	0.000131962
INTERPRO	IPR050405:Intermediate_filament	4	5.26316	1.5899e-06	DES, VIM, GFAP, PRPH	76	7	20667	155.391	0.000538831	0.000134744	0.000131962
INTERPRO	IPR018039:IF_conserved	6	7.89474	3.54719e-06	DES, VIM, NEFH, NES, GFAP, PRPH	76	64	20667	25.4938	0.00120178	0.000240499	0.000235533
INTERPRO	IPR039008:IF_rod_dom	6	7.89474	8.86119e-06	DES, VIM, NEFH, NES, GFAP, PRPH	76	77	20667	21.1897	0.00299945	0.000500658	0.000490319
INTERPRO	IPR001589:Actinin_actin-bd_CS	4	5.26316	7.71555e-05	FLNA, FLNC, SYNE2, PLEC	76	23	20667	47.2929	0.0258176	0.00373653	0.00365937
INTERPRO	IPR001781:Znf_LIM	5	6.57895	0.000168401	PDLIM3, CSRP2, ZYX, PDLIM5, PDLIM7	76	76	20667	17.8904	0.0554934	0.00713598	0.00698863
INTERPRO	IPR000557:Calponin_repeat	3	3.94737	0.000193088	CNN2, TAGLN2, CNN3	76	6	20667	135.967	0.0633665	0.00727299	0.00712281
INTERPRO	IPR050606:Calponin-like	3	3.94737	0.00046015	CNN2, TAGLN2, CNN3	76	9	20667	90.6447	0.144464	0.0155991	0.015277
INTERPRO	IPR050604:PDZ-LIM_domain	3	3.94737	0.000573835	PDLIM3, PDLIM5, PDLIM7	76	10	20667	81.5803	0.176825	0.0176846	0.0173194
INTERPRO	IPR003096:SM22_calponin	3	3.94737	0.000699706	CNN2, TAGLN2, CNN3	76	11	20667	74.1639	0.211232	0.0197667	0.0193585
KEGG_PATHWAY	hsa04820:Cytoskeleton in muscle cells	11	14.4737	5.0914e-07	PDLIM3, DES, CSRP2, COL6A1, ZYX, VIM, FLNC, PDLIM5, SYNE2, PDLIM7, PLEC	51	232	8865	8.24163	5.39674e-05	5.39689e-05	5.34597e-05
KEGG_PATHWAY	hsa01200:Carbon metabolism	6	7.89474	0.000466024	G6PD, PSAT1, GLDC, PHGDH, ACAT2, PSPH	51	116	8865	8.99087	0.0482092	0.0246993	0.0244663
KEGG_PATHWAY	hsa01230:Biosynthesis of amino acids	5	6.57895	0.000810735	PSAT1, ASNS, PHGDH, PSPH, ASS1	51	75	8865	11.5882	0.0823808	0.028646	0.0283757
KEGG_PATHWAY	hsa00260:Glycine, serine and threonine metabolism	4	5.26316	0.00154782	PSAT1, GLDC, PHGDH, PSPH	51	41	8865	16.9584	0.151424	0.0410172	0.0406302
SMART	SM00033:CH	8	10.5263	7.94726e-09	CNN2, FLNA, TAGLN2, IQGAP1, FLNC, SYNE2, CNN3, PLEC	45	66	10680	28.7677	3.89416e-07	3.89416e-07	3.89416e-07
SMART	SM01391:Filament	6	7.89474	1.30895e-05	DES, VIM, NEFH, NES, GFAP, PRPH	45	75	10680	18.9867	0.000641183	0.000320692	0.000320692
SMART	SM00132:LIM	5	6.57895	0.000221774	PDLIM3, CSRP2, ZYX, PDLIM5, PDLIM7	45	73	10680	16.2557	0.0108093	0.00362232	0.00362232
UP_KW_BIOLOGICAL_PROCESS	KW-0028~Amino-acid biosynthesis	5	6.57895	4.7729e-06	PSAT1, ASNS, PHGDH, PSPH, ASS1	48	28	11434	42.5372	0.000286334	0.000286374	0.000286374
UP_KW_BIOLOGICAL_PROCESS	KW-0718~Serine biosynthesis	3	3.94737	4.94854e-05	PSAT1, PHGDH, PSPH	48	3	11434	238.208	0.0029648	0.00148456	0.00148456
UP_KW_CELLULAR_COMPONENT	KW-0963~Cytoplasm	46	60.5263	2.97067e-09	YAP1, CLIC4, ISYNA1, HIP1, CRABP2, MVP, HSPB1, CLTA, MSI1, IQGAP1, ACAT2, SYNE2, PDLIM3, LGALS1, PEA15, IGF2BP1, COTL1, FLNA, CKB, FLNC, SYNPO, CRYM, PDLIM5, NEFH, CLIC1, PSPH, PDLIM7, PRPH, G6PD, ANXA1, DYNLT1, HMGCS1, DLK1, ASS1, GFAP, EHD2, MARCKS, DES, PALLD, CDC42EP4, ZYX, VIM, EZR, CRYAB, ADA, PLEC	67	5827	17932	2.11284	8.02082e-08	8.02082e-08	7.12962e-08
UP_KW_CELLULAR_COMPONENT	KW-0206~Cytoskeleton	19	25	2.56555e-06	CLIC4, DYNLT1, HSPB1, CLTA, SYNE2, MARCKS, PALLD, CDC42EP4, COTL1, ZYX, FLNA, VIM, FLNC, EZR, SYNPO, NEFH, PDLIM7, PLEC, PRPH	67	1429	17932	3.55857	6.92676e-05	3.4635e-05	3.07866e-05
UP_KW_CELLULAR_COMPONENT	KW-0403~Intermediate filament	6	7.89474	9.93269e-06	DES, VIM, NEFH, NES, GFAP, PRPH	67	78	17932	20.5878	0.000268148	8.93942e-05	7.94615e-05
UP_KW_CELLULAR_COMPONENT	KW-0965~Cell junction	9	11.8421	0.0001366	YAP1, CLIC4, PALLD, ZYX, FLNA, SYNPO, ADA, SYNE2, PLEC	67	415	17932	5.80428	0.00368165	0.000922047	0.000819598
UP_KW_CELLULAR_COMPONENT	KW-0272~Extracellular matrix	6	7.89474	0.00368281	LGALS1, SPARC, ANXA2, COL6A1, TNC, TGFBI	67	280	17932	5.73518	0.0948181	0.0198872	0.0176775
UP_KW_DOMAIN	KW-0440~LIM domain	5	6.57895	0.000128019	PDLIM3, CSRP2, ZYX, PDLIM5, PDLIM7	52	74	14566	18.9267	0.00179078	0.00179227	0.00166425
UP_KW_DOMAIN	KW-0677~Repeat	29	38.1579	0.00244277	YAP1, MVP, TNC, MSI1, IQGAP1, SYNE2, TYMP, CNN3, ICAM1, MRC2, CNN2, CSRP2, IGF2BP1, FLNA, FLNC, PDLIM5, NEFH, PDLIM7, ANXA1, ANXA2, MYOF, DOHH, DLK1, PALLD, COL6A1, ZYX, TGFBI, SDK2, PLEC	52	5058	14566	1.60604	0.033661	0.0170994	0.015878
UP_KW_MOLECULAR_FUNCTION	KW-0009~Actin-binding	11	14.4737	3.55959e-07	CNN2, MARCKS, HIP1, PALLD, COTL1, FLNA, FLNC, SYNPO, SYNE2, CNN3, PLEC	53	285	11859	8.63615	1.10347e-05	1.10347e-05	1.10347e-05
UP_KW_PTM	KW-0007~Acetylation	45	59.2105	1.67181e-10	CLIC4, GLDC, MVP, SLC2A1, HSPB1, CLTA, MSI1, CROT, SLC1A5, IQGAP1, ACAT2, SYNE2, CNN3, CNN2, LGALS1, CSRP2, SERPINH1, COTL1, FLNA, PHGDH, SYNPO, PDLIM5, CLIC1, PSPH, G6PD, ANXA1, DYNLT1, HMGCS1, ANXA2, CAV1, MYOF, ASNS, DOHH, ASS1, MARCKS, PSAT1, EEF1A2, ZYX, TAGLN2, VIM, EZR, CRYAB, NES, ADA, PLEC	75	3505	14268	2.44245	3.00925e-09	3.17643e-09	3.17643e-09
UP_KW_PTM	KW-0597~Phosphoprotein	61	80.2632	4.30278e-05	DDR1, CLIC4, HIP1, DPYS, TNC, SLC2A1, CLTA, HSPB1, MSI1, SYNE2, ICAM1, MRC2, LGALS1, PEA15, PHGDH, SYNPO, NEFH, CLIC1, G6PD, ANXA1, ANXA2, DYNLT1, HMGCS1, MYOF, PALLD, CDC42EP4, EEF1A2, TAGLN2, EZR, CRYAB, PLEC, YAP1, ISYNA1, TTYH1, MVP, SLC1A5, IQGAP1, TYMP, CNN3, CNN2, PDLIM3, IGF2BP1, SERPINH1, FLNA, CKB, FLNC, PDLIM5, PDLIM7, PRPH, CAV1, ASNS, ASS1, GFAP, EHD2, MARCKS, DES, PSAT1, ZYX, TGFBI,…	75	8416	14268	1.37888	0.000774217	0.000408764	0.000408764
UP_SEQ_FEATURE	REGION:Linker 2	5	6.57895	7.57165e-08	DES, NEFH, NES, GFAP, PRPH	75	12	20502	113.9	4.89117e-05	4.89128e-05	4.77014e-05
UP_SEQ_FEATURE	DOMAIN:Calponin-homology (CH)	7	9.21053	3.76117e-07	CNN2, FLNA, TAGLN2, IQGAP1, SYNE2, CNN3, PLEC	75	78	20502	24.5323	0.000242942	0.000121486	0.000118477
UP_SEQ_FEATURE	REGION:Coil 2B	4	5.26316	8.95784e-07	DES, NEFH, NES, GFAP	75	6	20502	182.24	0.00057851	0.000144669	0.000141086
UP_SEQ_FEATURE	REGION:Coil 2A	4	5.26316	8.95784e-07	DES, NEFH, NES, GFAP	75	6	20502	182.24	0.00057851	0.000144669	0.000141086
UP_SEQ_FEATURE	REGION:Coil 1B	6	7.89474	5.01417e-06	DES, VIM, NEFH, NES, GFAP, PRPH	75	69	20502	23.7704	0.00323392	0.000496937	0.000484629
UP_SEQ_FEATURE	REGION:Coil 1A	6	7.89474	5.38477e-06	DES, VIM, NEFH, NES, GFAP, PRPH	75	70	20502	23.4309	0.00347252	0.000496937	0.000484629
UP_SEQ_FEATURE	REGION:Linker 1	6	7.89474	5.38477e-06	DES, VIM, NEFH, NES, GFAP, PRPH	75	70	20502	23.4309	0.00347252	0.000496937	0.000484629
UP_SEQ_FEATURE	REGION:Head	6	7.89474	6.62678e-06	DES, VIM, NEFH, NES, GFAP, PRPH	75	73	20502	22.4679	0.00427176	0.000522139	0.000509207
UP_SEQ_FEATURE	REGION:Tail	6	7.89474	7.57208e-06	DES, VIM, NEFH, NES, GFAP, PRPH	75	75	20502	21.8688	0.00487964	0.000522139	0.000509207
UP_SEQ_FEATURE	DOMAIN:IF rod	6	7.89474	8.08265e-06	DES, VIM, NEFH, NES, GFAP, PRPH	75	76	20502	21.5811	0.00520781	0.000522139	0.000509207
UP_SEQ_FEATURE	REGION:Linker 12	5	6.57895	8.43316e-05	DES, VIM, NEFH, NES, GFAP	75	64	20502	21.3562	0.0530231	0.00495257	0.0048299
UP_SEQ_FEATURE	DOMAIN:Calponin-homology (CH) 2	4	5.26316	0.000124056	FLNA, FLNC, SYNE2, PLEC	75	27	20502	40.4978	0.0770178	0.00616465	0.00601196
UP_SEQ_FEATURE	DOMAIN:Calponin-homology (CH) 1	4	5.26316	0.000124056	FLNA, FLNC, SYNE2, PLEC	75	27	20502	40.4978	0.0770178	0.00616465	0.00601196
UP_SEQ_FEATURE	CROSSLNK:Glycyl lysine isopeptide (Lys-Gly) (interchain with G-Cter in SUMO1); alternate	6	7.89474	0.000512206	ANXA1, ANXA2, FLNA, PHGDH, VIM, NES	75	182	20502	9.01187	0.281773	0.0236346	0.0230493
UP_SEQ_FEATURE	DOMAIN:LIM zinc-binding 2	4	5.26316	0.00083004	CSRP2, ZYX, PDLIM5, PDLIM7	75	51	20502	21.44	0.415167	0.0335129	0.0326828
UP_SEQ_FEATURE	DOMAIN:LIM zinc-binding 1	4	5.26316	0.00083004	CSRP2, ZYX, PDLIM5, PDLIM7	75	51	20502	21.44	0.415167	0.0335129	0.0326828
